# Supplementary material for: Ipl1/Aurora-B is necessary for kinetochore restructuring in meiosis I in Saccharomyces cerevisiae
Source: PubMed Central journal article supplement — Mol Biol Cell. 2015 Sep 1;26(17):2986–3000. doi: 10.1091/mbc.E15-01-0032 (PMC4551314; doi:10.1091/mbc.e15-01-0032), 2015-09-01
Supplement: supp_E15-01-0032v1_CombinedSupMats.pdf [file supp_E15-01-0032v1_CombinedSupMats.pdf]

# Supplemental Materials

*Molecular Biology of the Cell*

Meyer et al.

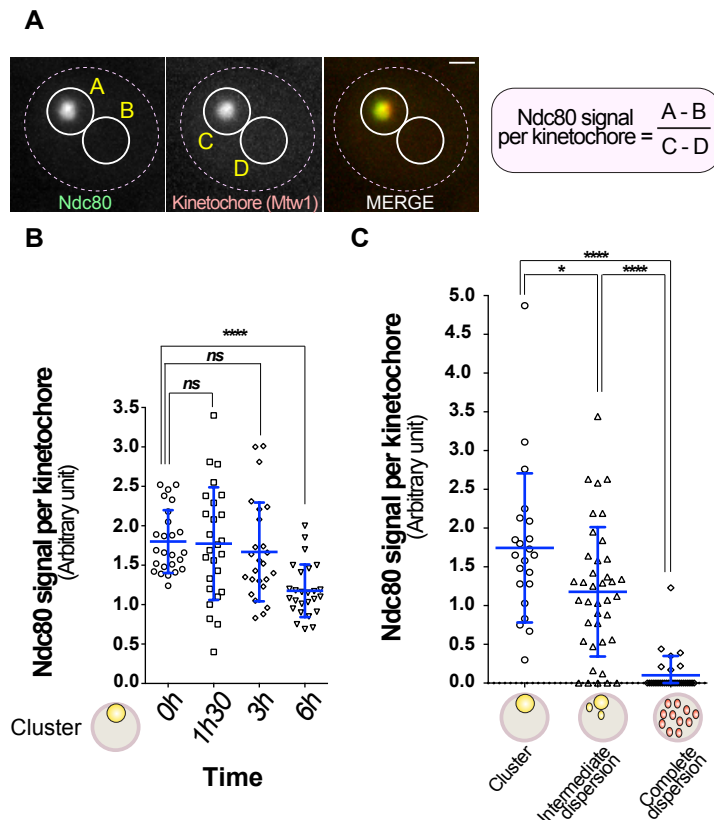

**Figure S1.** Quantification of Ndc80 association with kinetochores during meiosis I. Wild-type diploid cells expressing Ndc80-GFP and Mtw1-3xmCherry were switched to sporulation medium ( $T = 0$  h). The strains used were *ndt80* mutants that arrest in pachytene. Cells with clustered centromeres (1 focus), intermediate dispersion ( $<4$  Mtw1 foci), or complete dispersion ( $>4$  Mtw1 foci) were used for quantification of Ndc80 signal ( $n \geq 22$ ). (A) To quantify the relative amount of Ndc80 (using Ndc80-GFP) per kinetochore (using Mtw1-RFP), images were collected as seven slice Z series ( $0.5 \mu\text{m}$  intervals). A summed projection of these images was then used for analysis of GFP and RFP fluorescence intensity. An area (A) containing the kinetochores (Mtw1-mCherry) signal was first selected and the signal in this area in the Ndc80 (GFP) channel was determined. This value was corrected for background signal by selecting a nearby, same-sized area (B) and determining the GFP signal in this area, which was then subtracted from value (A). The total Mtw1 signal (mCherry) in the selected area was determined (C) and the background value subtracted (D). The corrected GFP value (A minus B) was then divided by the corrected mCherry value (C minus D) to obtain a normalized Ndc80/Mtw1 value for that cell. These values were then plotted. Scale bar,  $1 \mu\text{m}$ . (B) Ndc80 signals at clustered centromeres at times after meiotic induction. For panel (B), the area of analysis was  $0.5 \mu\text{m}$  in diameter. (C) Ndc80 signals at clustered, intermediate dispersed and completely dispersed kinetochores 3 hours after meiotic induction. For panel (C) the area of analysis was expanded to  $1.1 \mu\text{m}$  diameter in all cells tested to allow inclusion of dispersed kinetochores. Graphs show values of individual cells, average and one standard deviation. Student's t-tests were used to evaluate the significance of observed differences. \* $p < 0.05$ , \*\*\*\* $p < 0.0001$ .

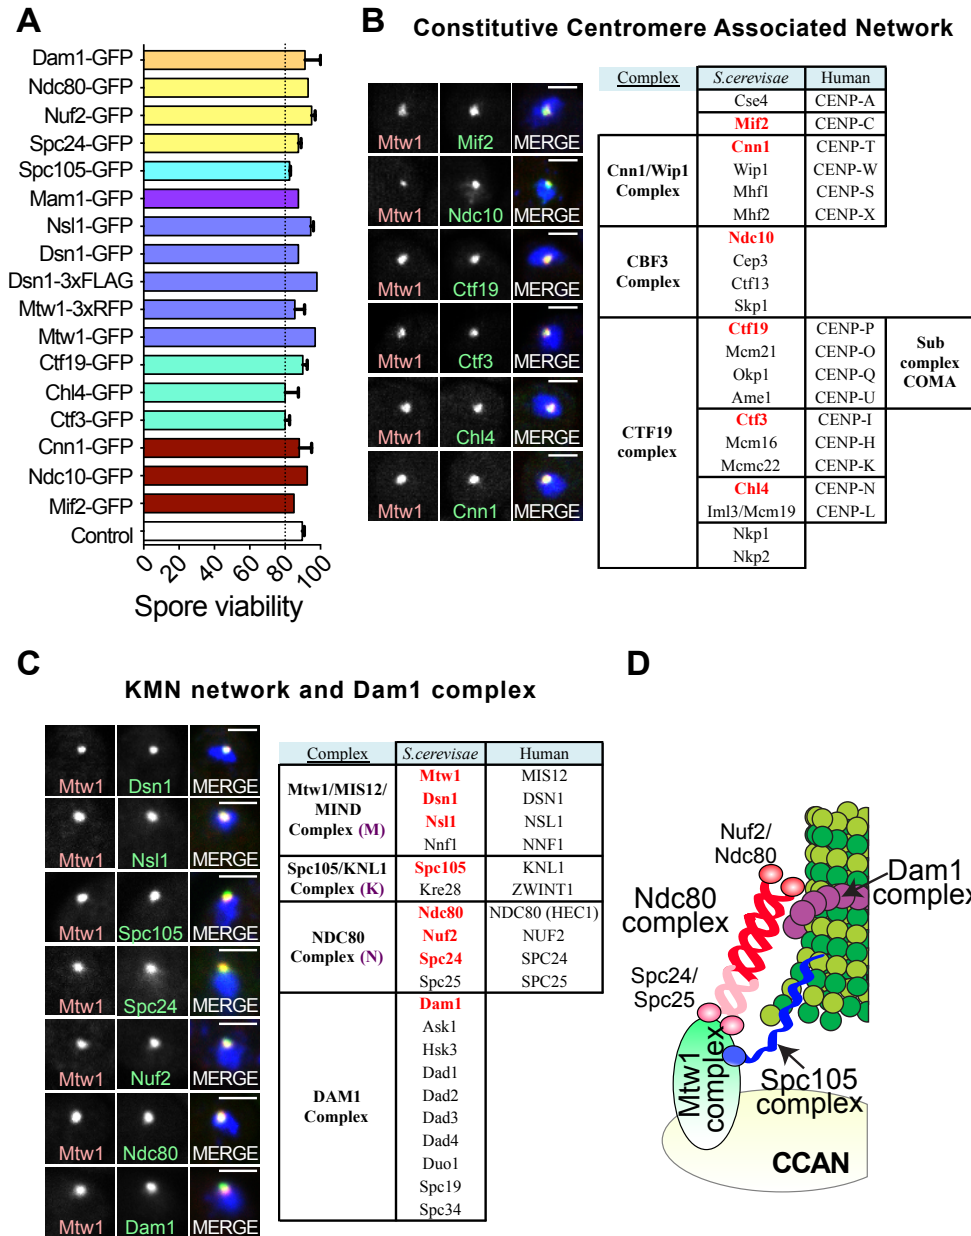

**Figure S2.** Kinetochore structure when cells enter meiosis. (A) Tetrad dissection was used to quantify the effect of tagging each kinetochore component on spore viability. (B-C) Wild-type diploid cells expressing Mtw1-3xmCherry and GFP-tagged kinetochore proteins were switched to sporulation medium and fluorescence microscopy was used to monitor the presence of the individual components on the kinetochore cluster that is characteristic of cells at meiotic entry. Tables (B) and (C) list components of the kinetochore and the names of the mammalian homologs. All components tested (red in the tables) were detectable in the kinetochore cluster suggesting kinetochores are intact at meiotic entry. A representative image of a cell with each GFP-tagging kinetochores is shown. Scale bars = 2µm. (D) Cartoon showing kinetochore sub-complexes.

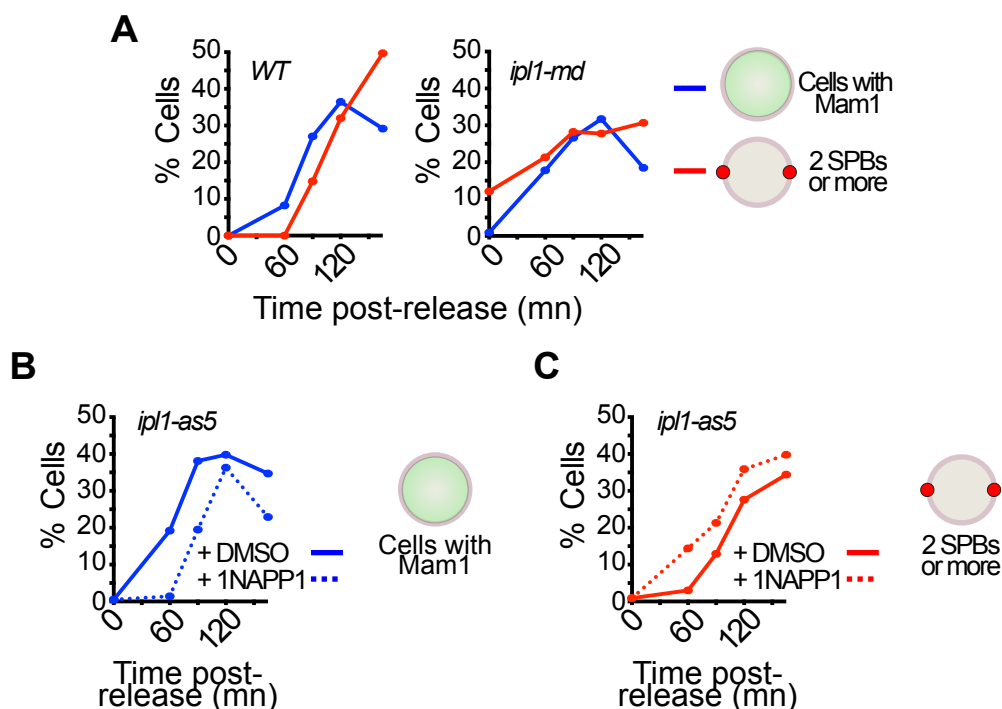

**Figure S3.** Effect of Ipl1 inactivation on spindle formation and Mam1 expression. (A-C) Wild-type and *ipl1* mutant (*ipl1-md* and *ipl1-as5/ipl1-md*) cells carrying a monopolin marker (*MAM1-GFP*), a kinetochore marker (*MTW1-GFP*), and also a SPB marker (*SPC42-DsRed*) in the *ipl1* mutants were sporulated and released from a pachytene arrest (*P<sub>GALI</sub>-NDT80 GAL4-ER*) at 6 hours after meiotic induction by the addition of 5  $\mu$ M  $\beta$ -estradiol. (A) For wild-type and *ipl1-md* mutants, cells with Mam1 or with two SPBs or more were scored ( $n \geq 100$  for all time points). (B-C) Ipl1-as5 was inhibited (dashed lines) or not (straight lines) by adding 50 $\mu$ M 1NA-PP1 or DMSO upon the release from pachytene arrest. Cells with Mam1 (B) or with two SPBs or more (C) were counted. ( $n \geq 100$  for all time points). In all experiments, *ipl1* mutants formed spindles earlier due to the role of Ipl1 in preventing precocious spindle assembly (Kim et al., 2013). Mam1 was expressed with similar kinetics in wild-type cells and *ipl1* mutants, suggesting that the failures in Mam1 loading in Ipl1 mutants is not due to a dramatic reduction or delay in expression.

# MTW1

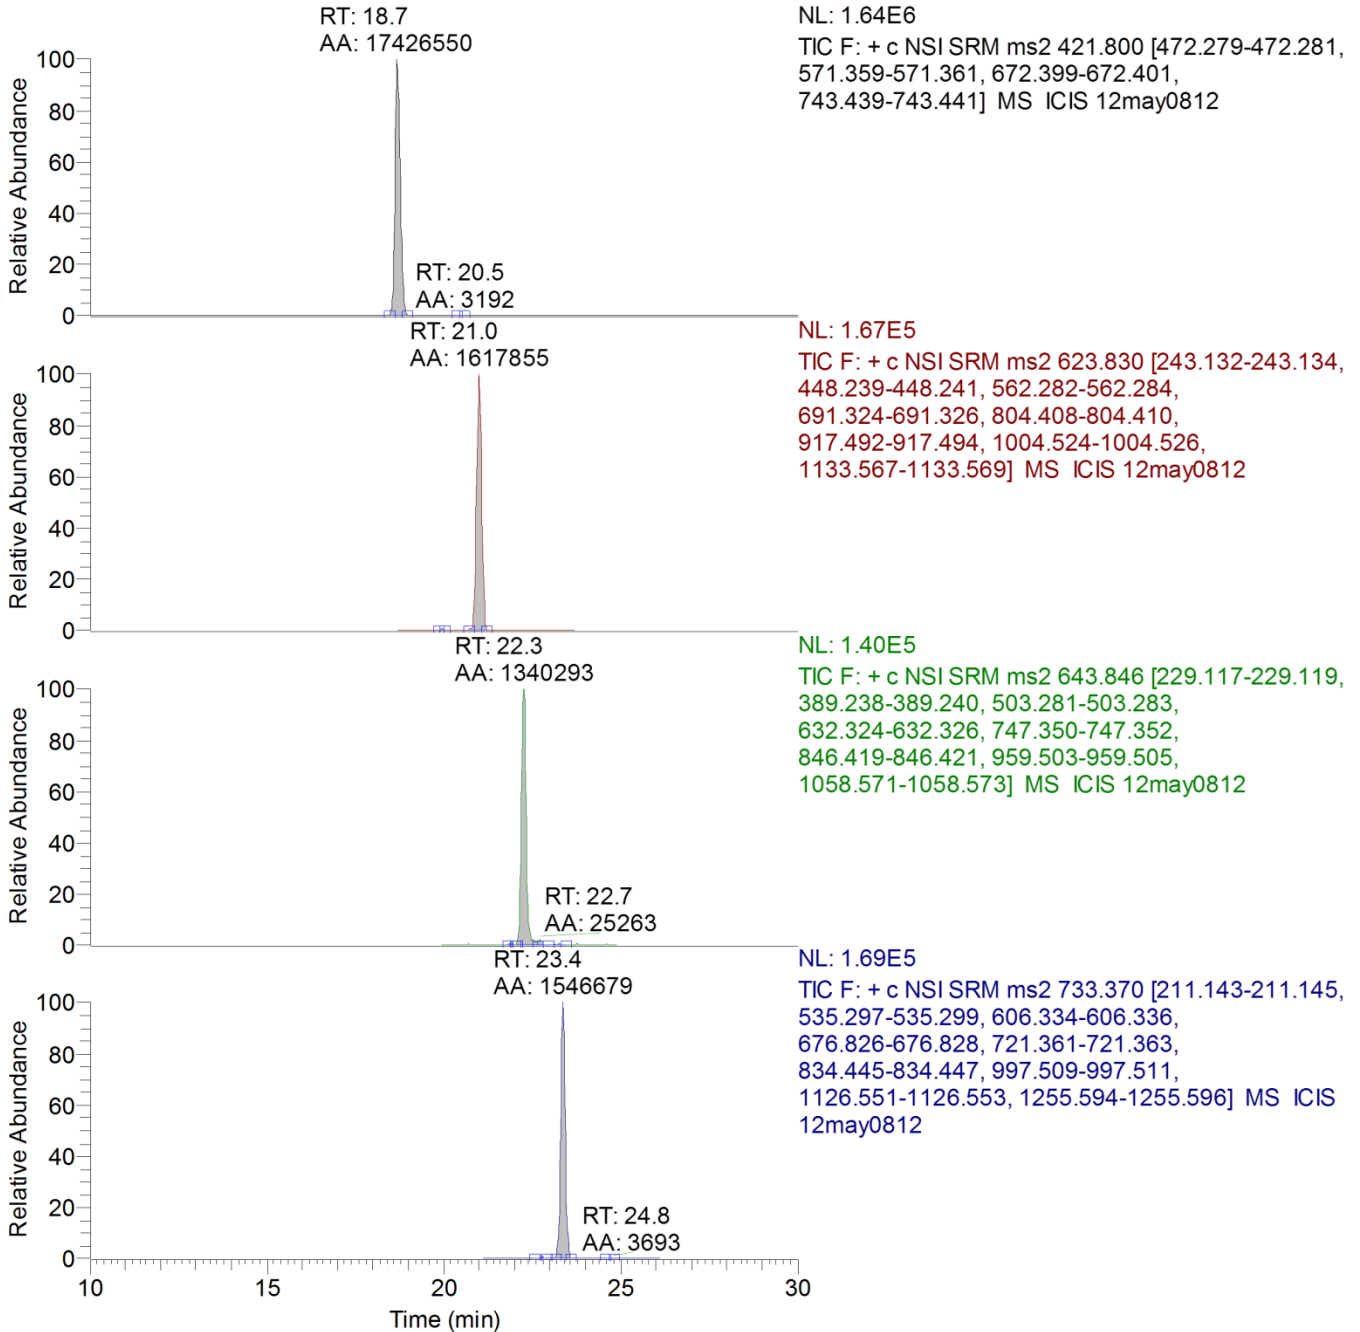

# NSL1

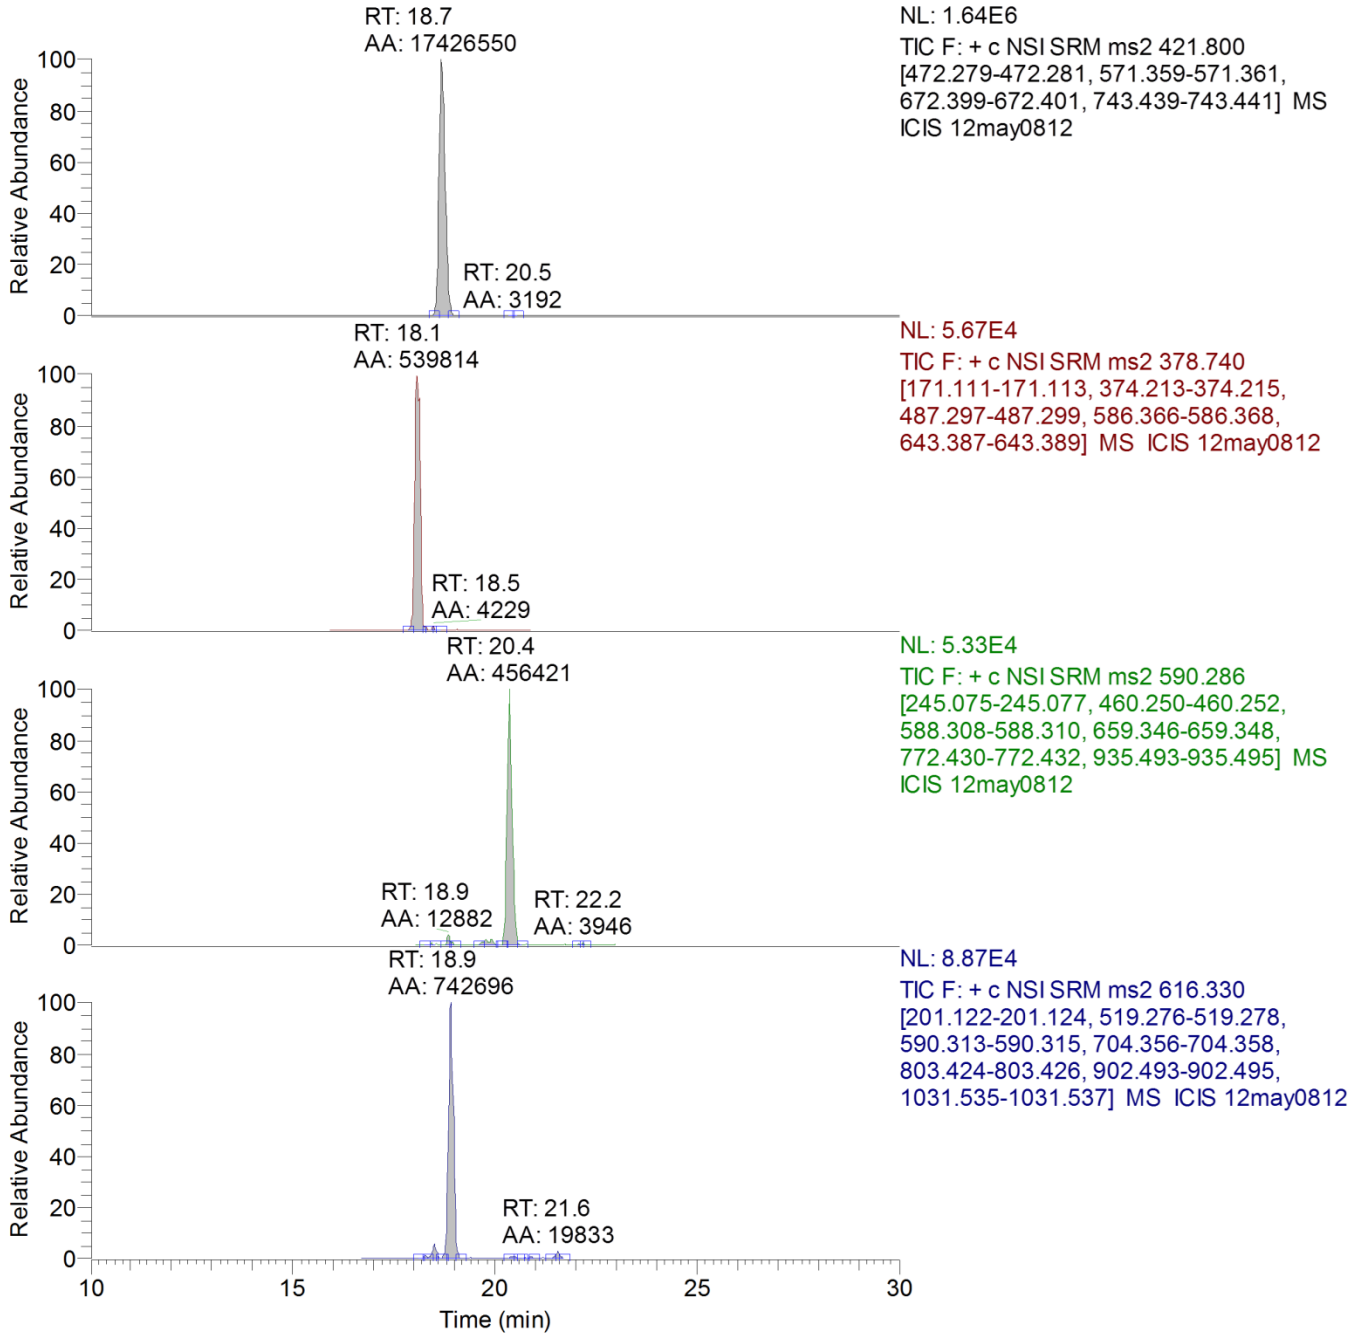

# DSN1

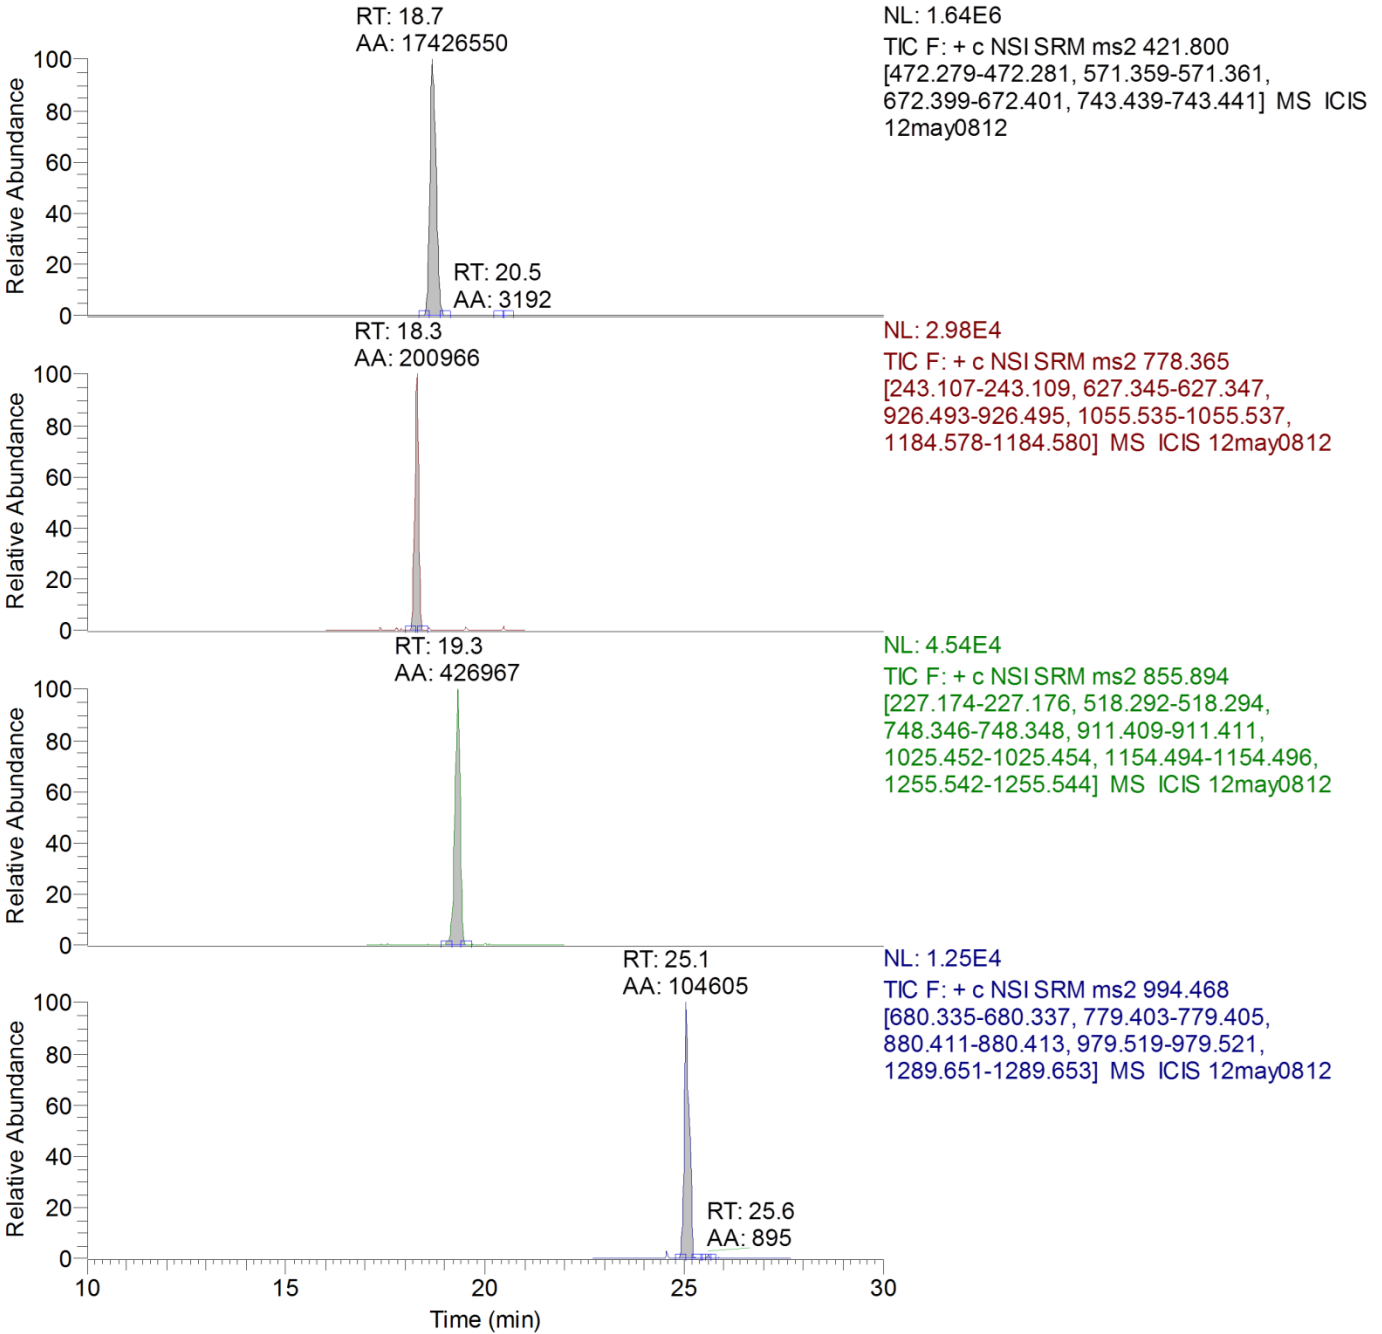

# NNF1

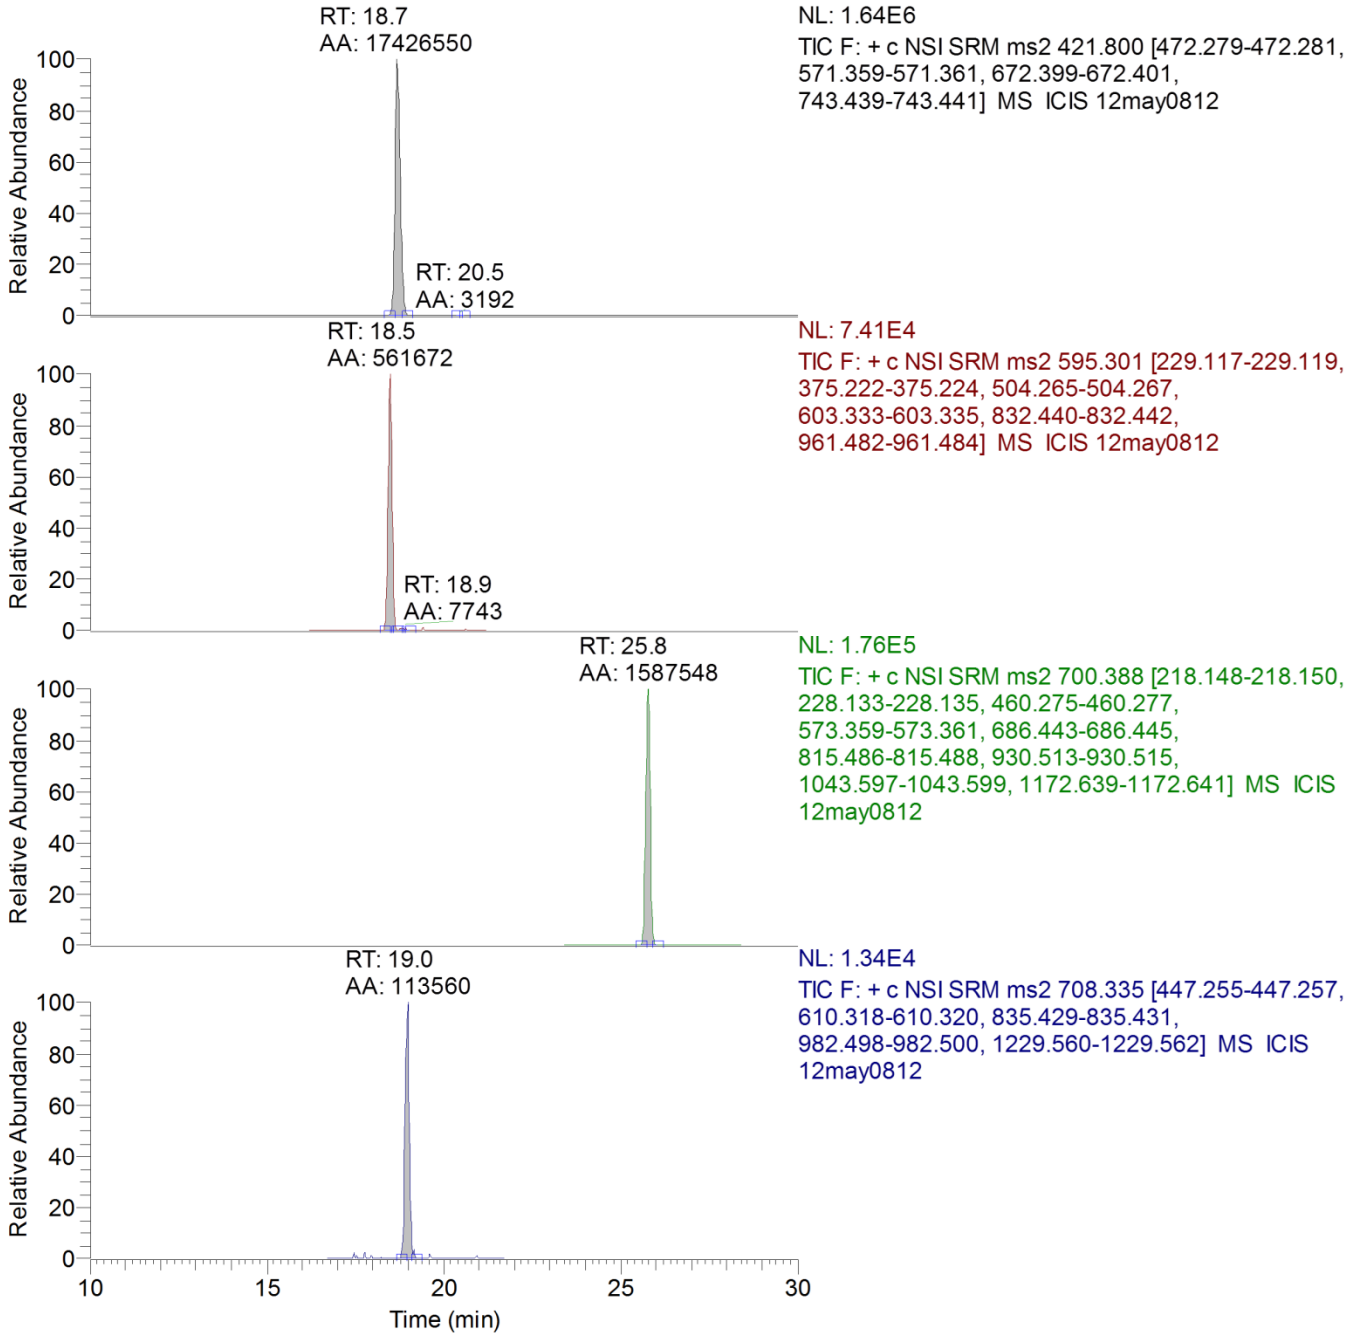



# NDC80

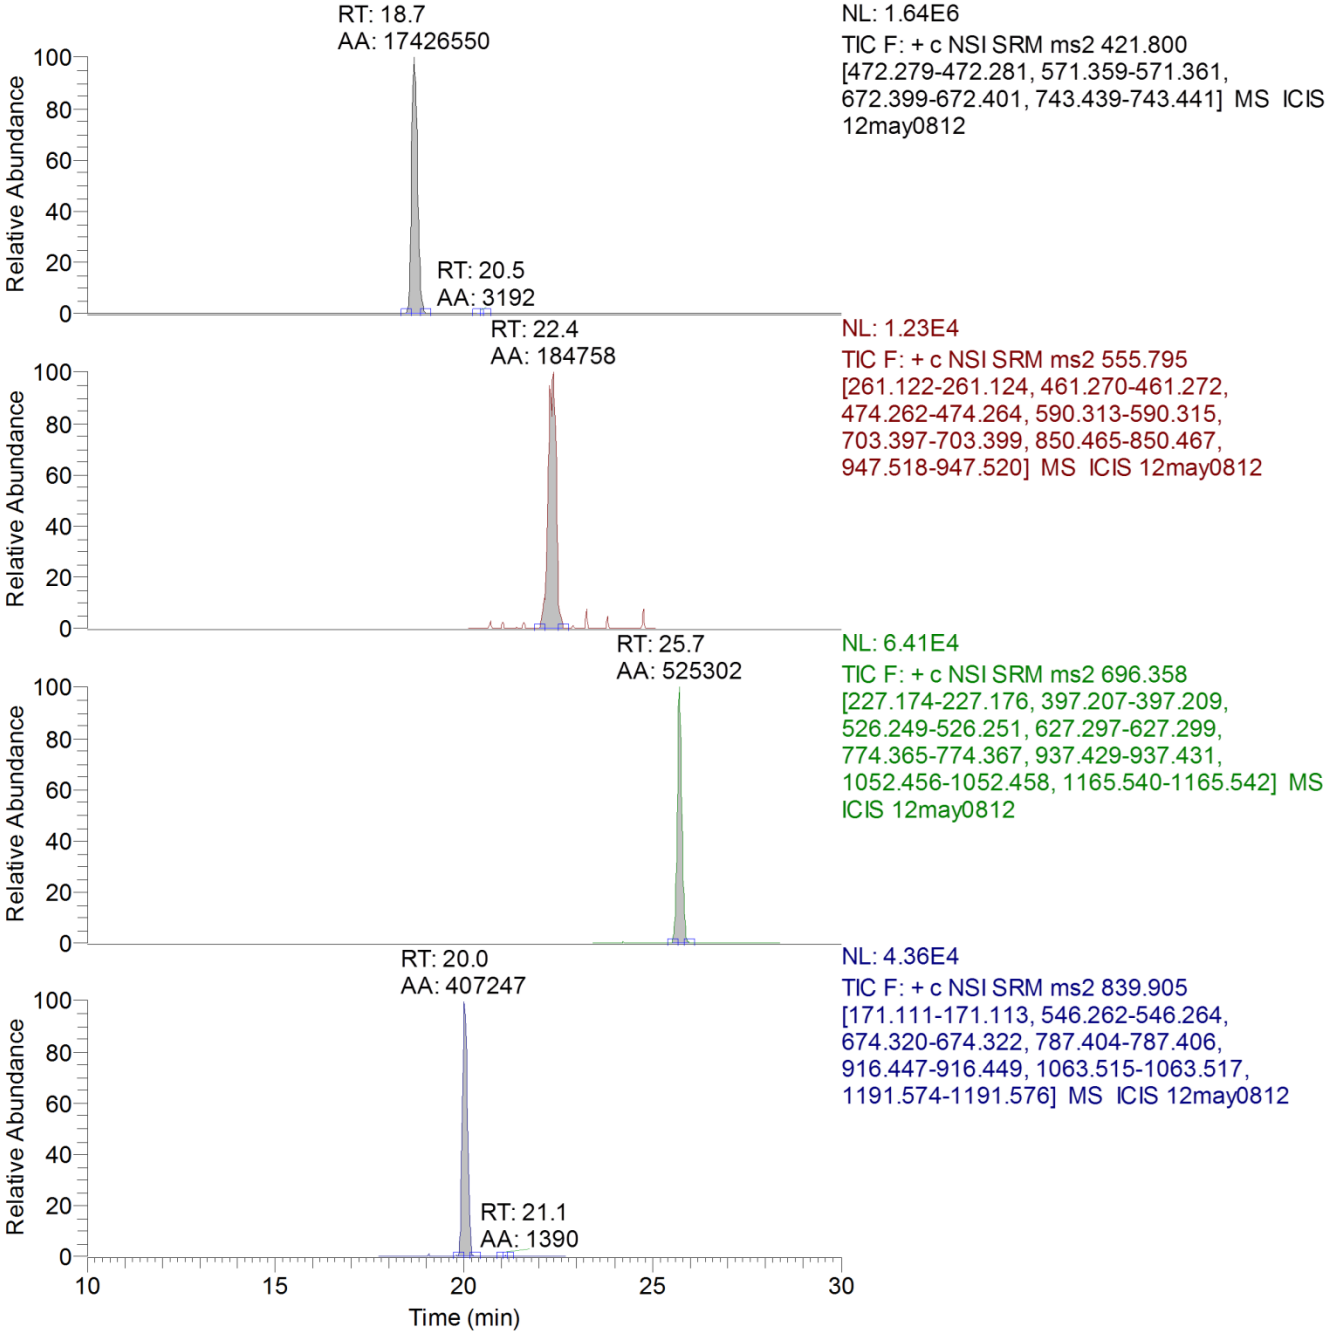

# NUF2

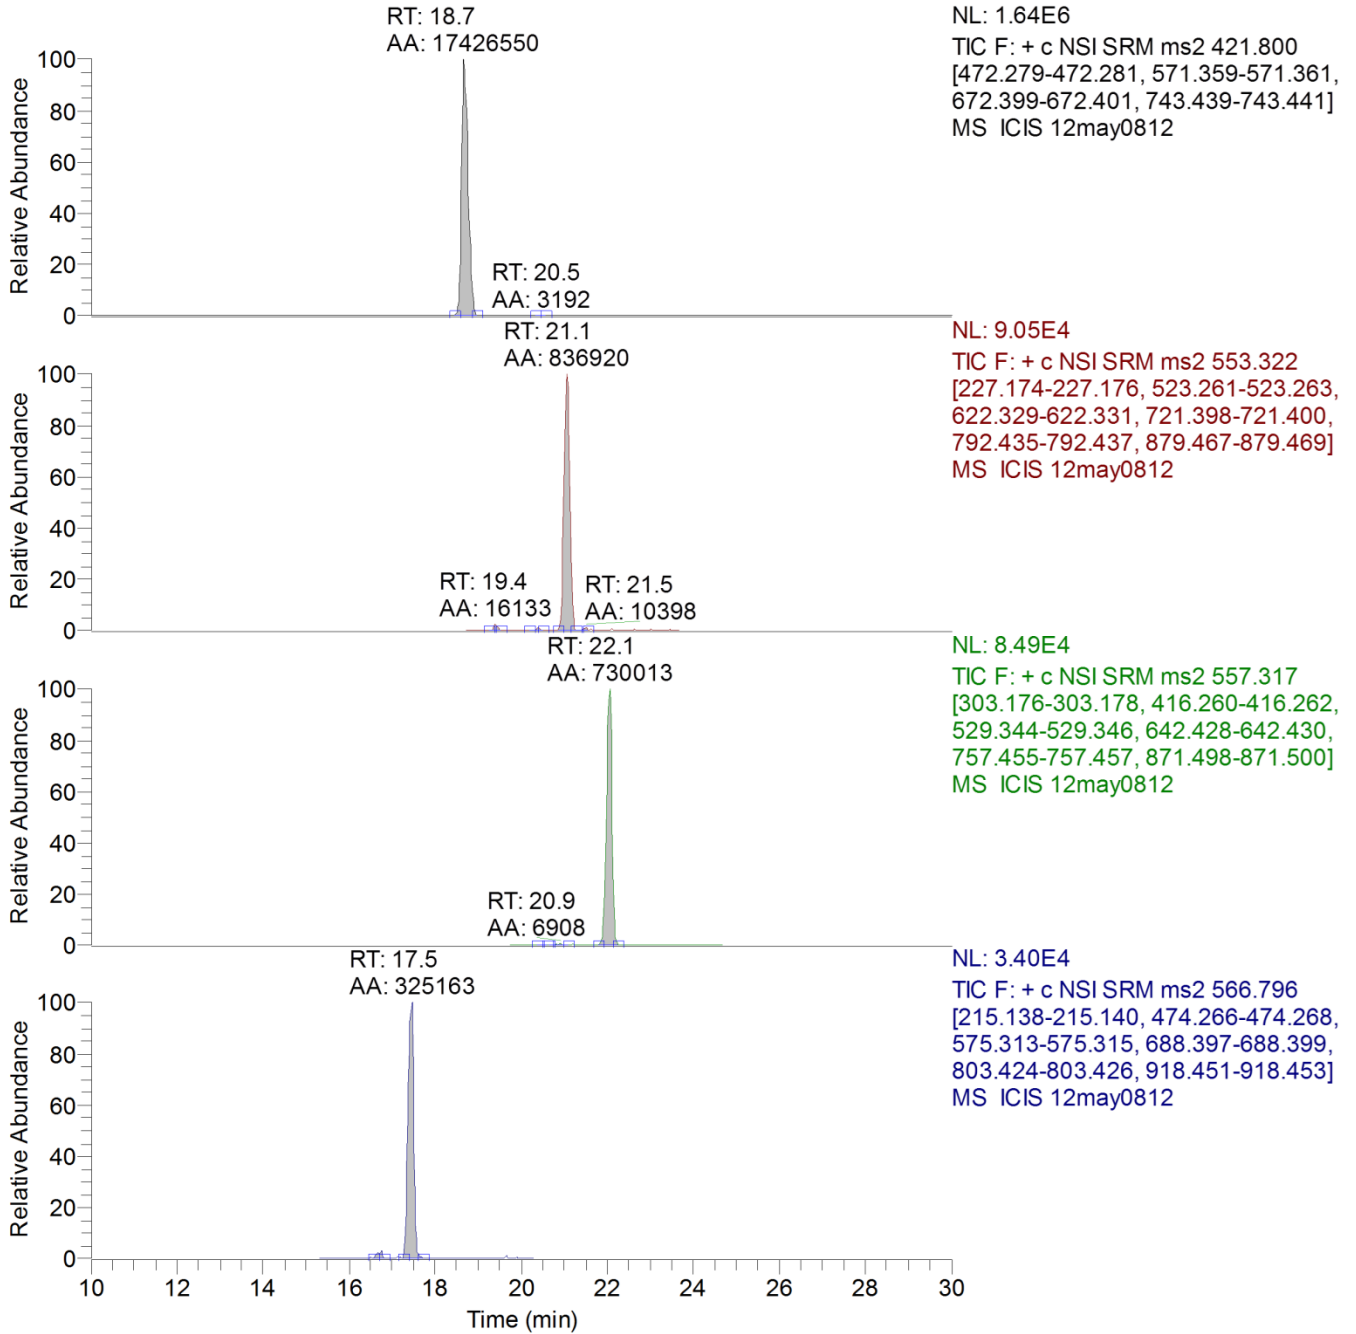

# SPC24

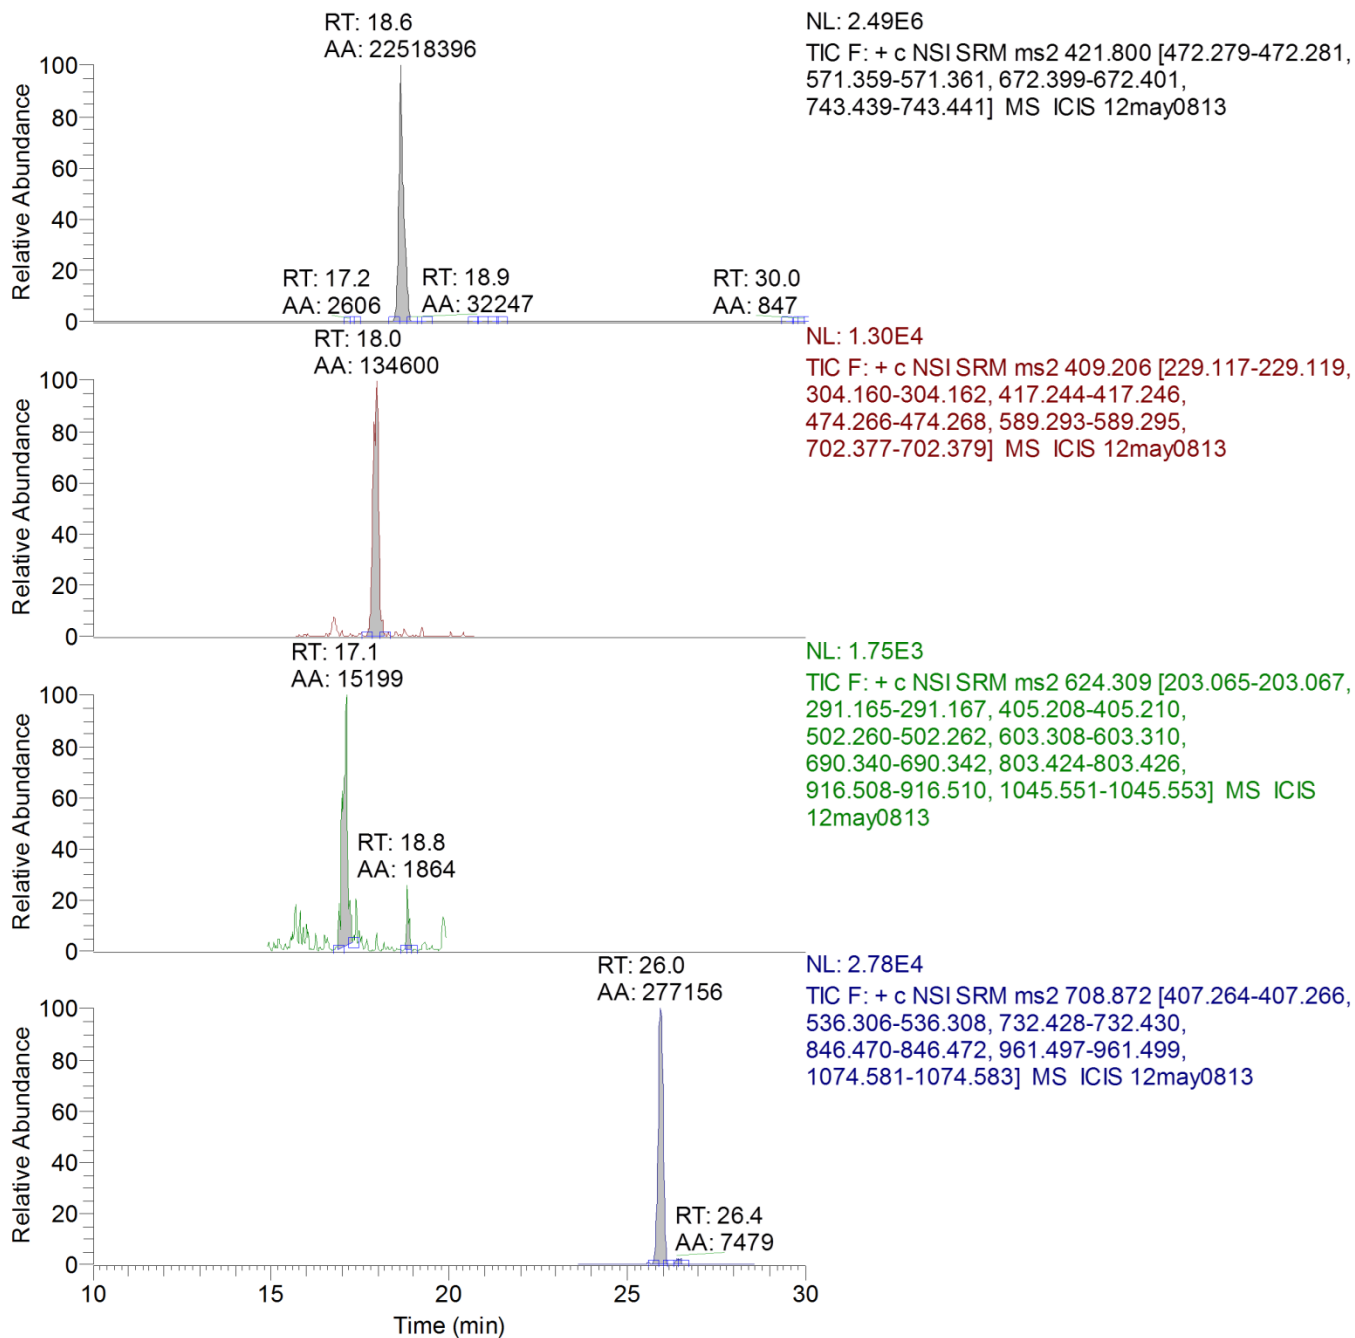

# SPC25

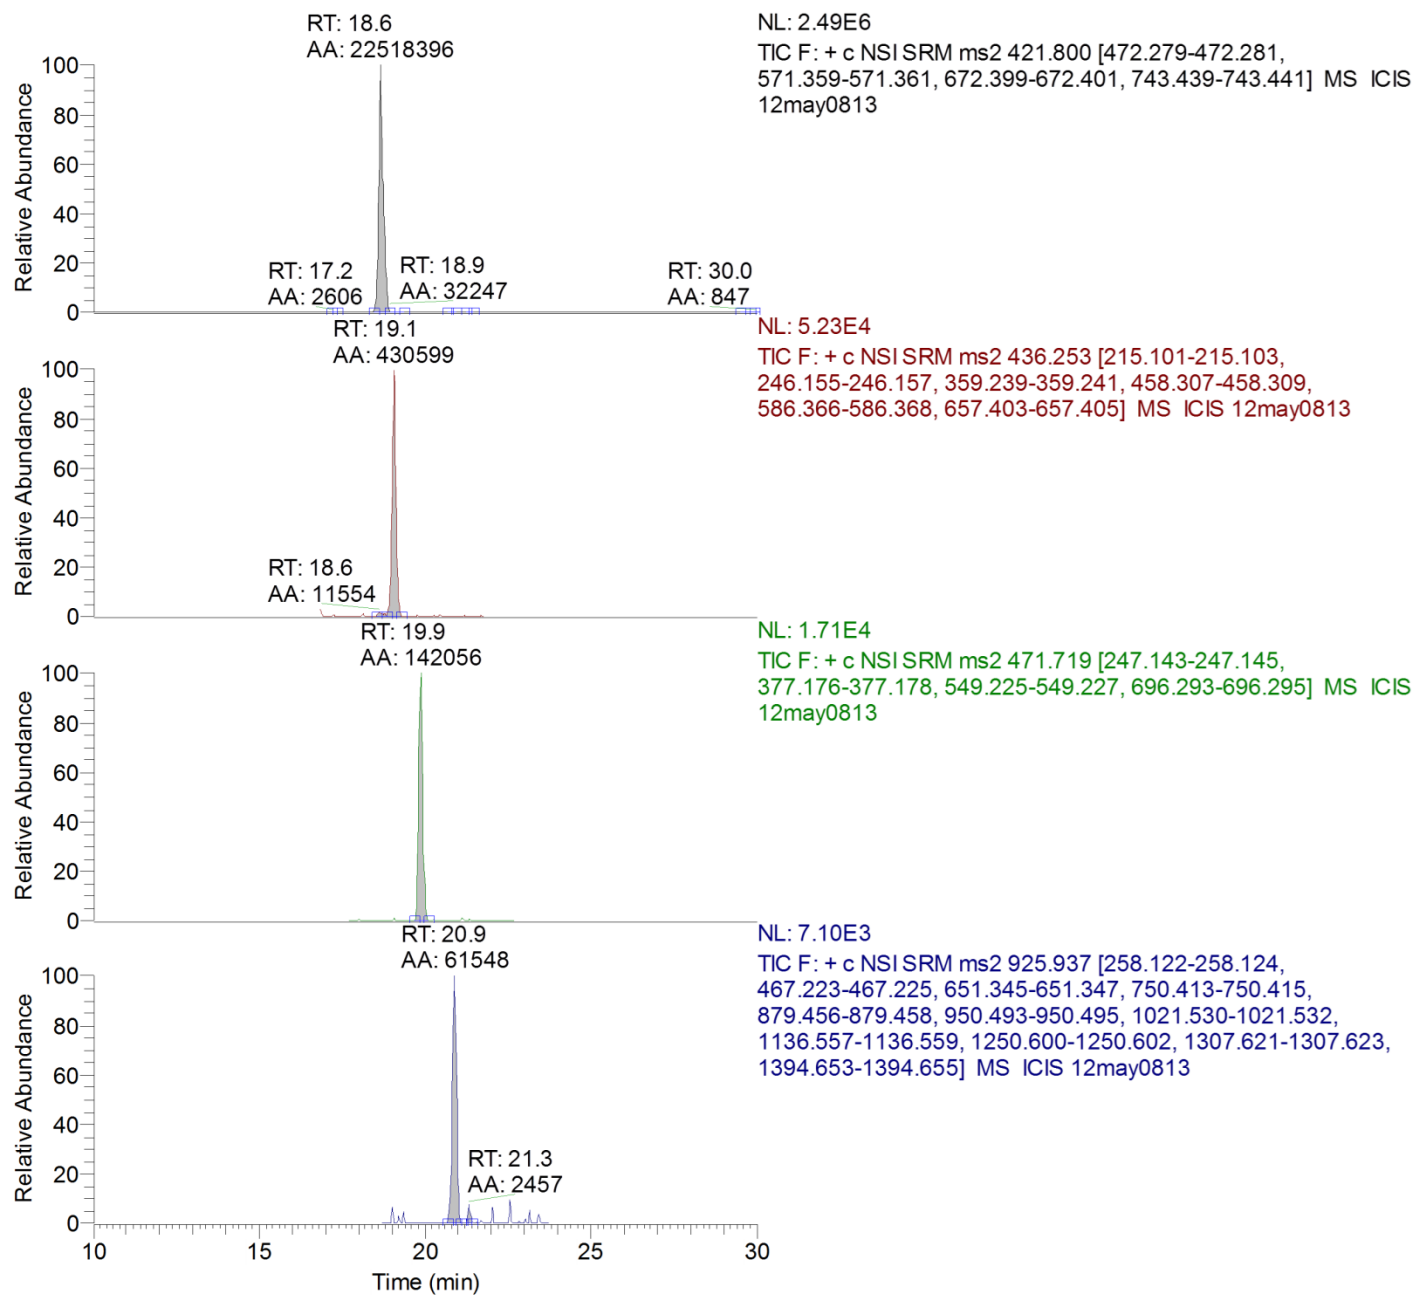

# SPC105

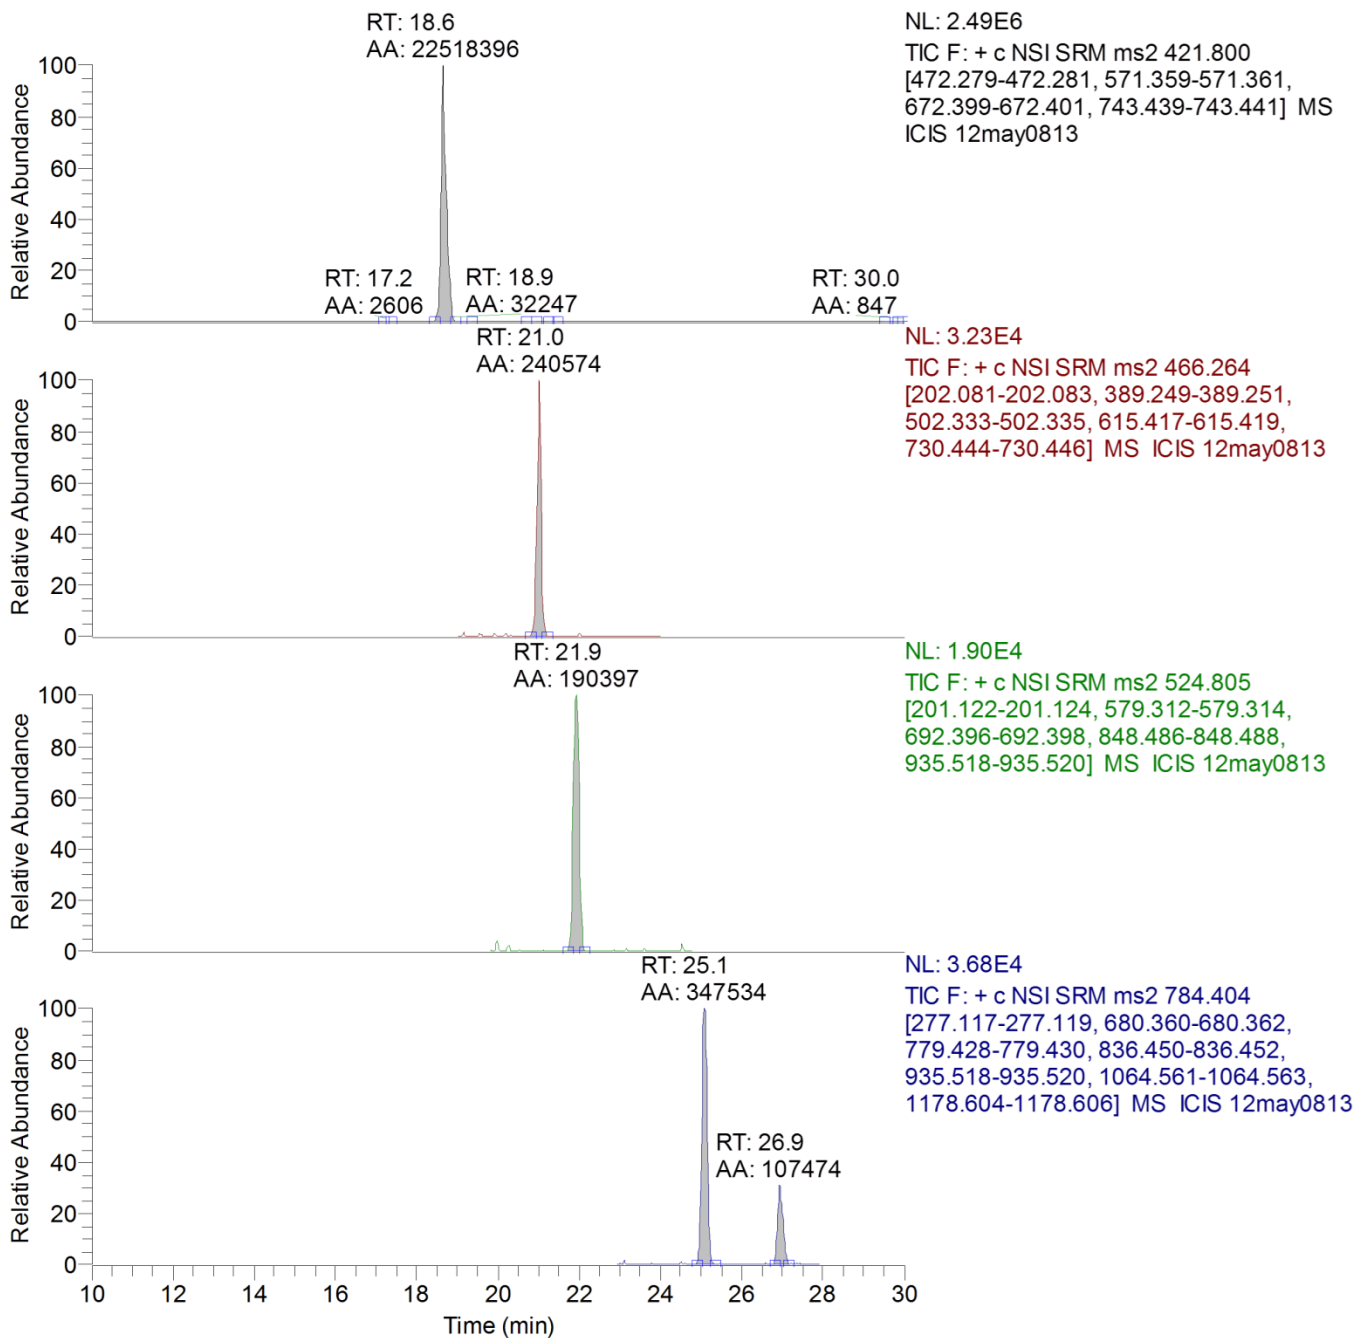

# KRE28

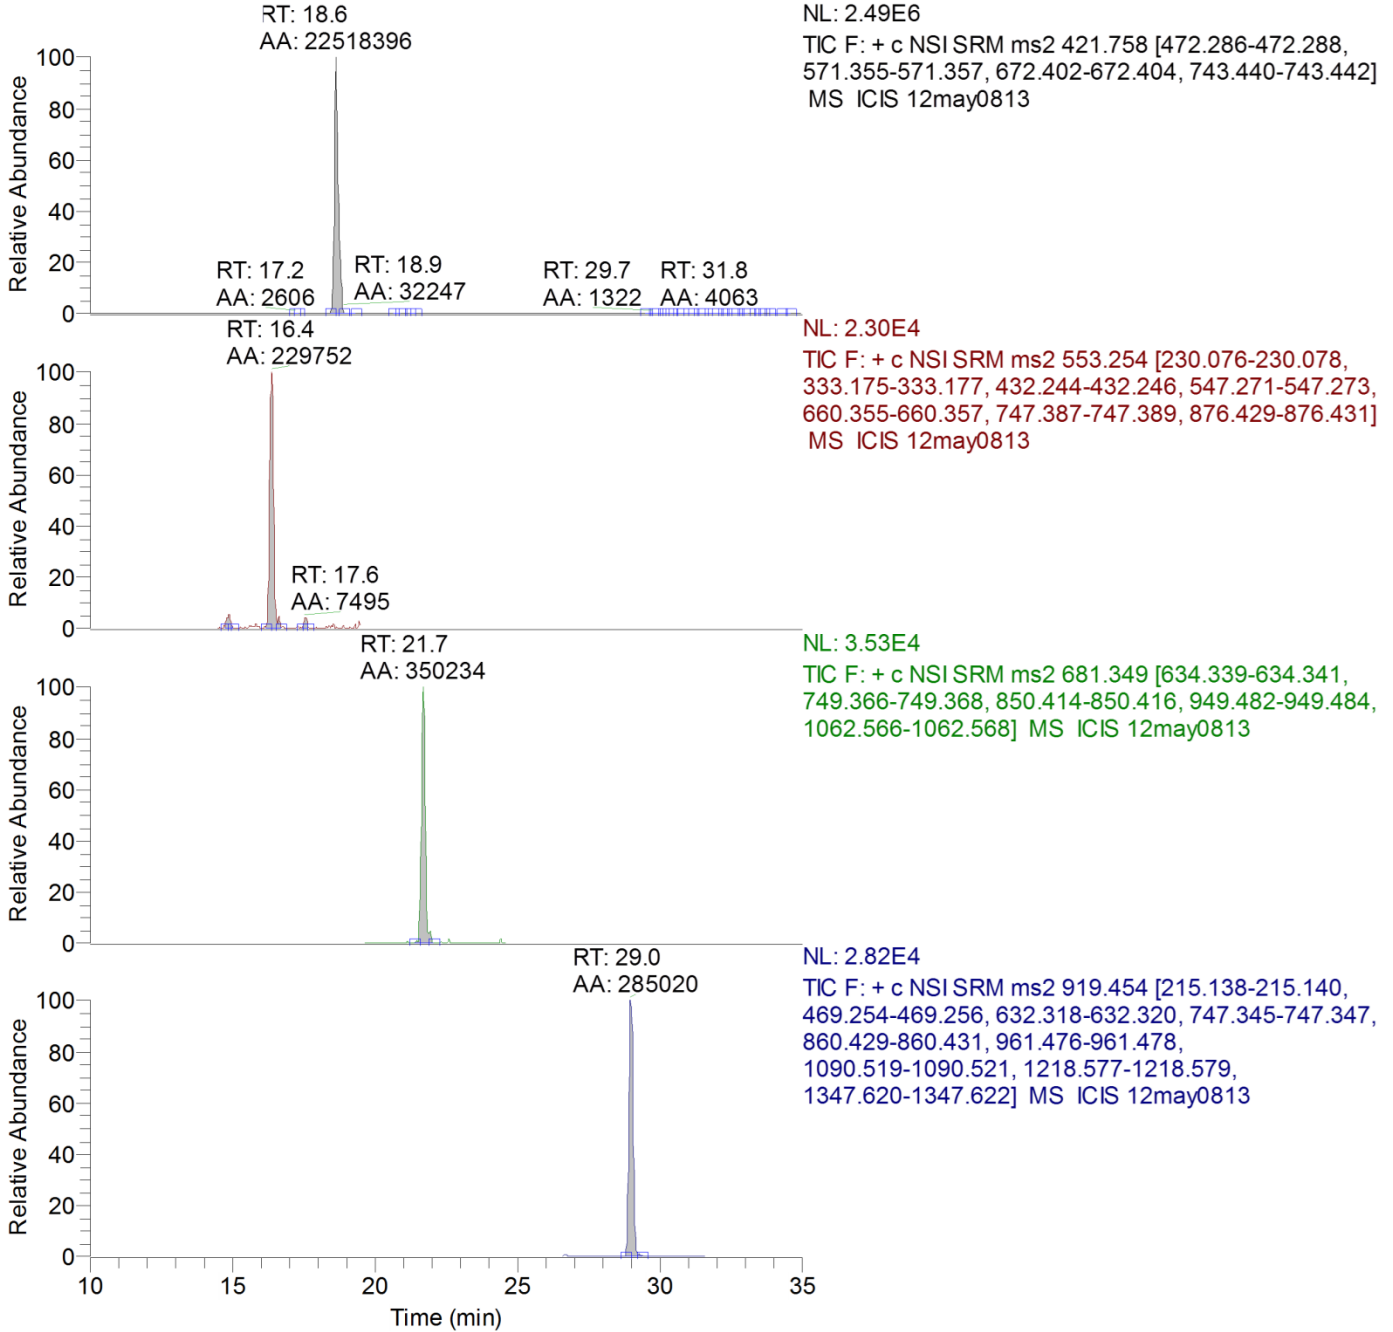

# CTF19

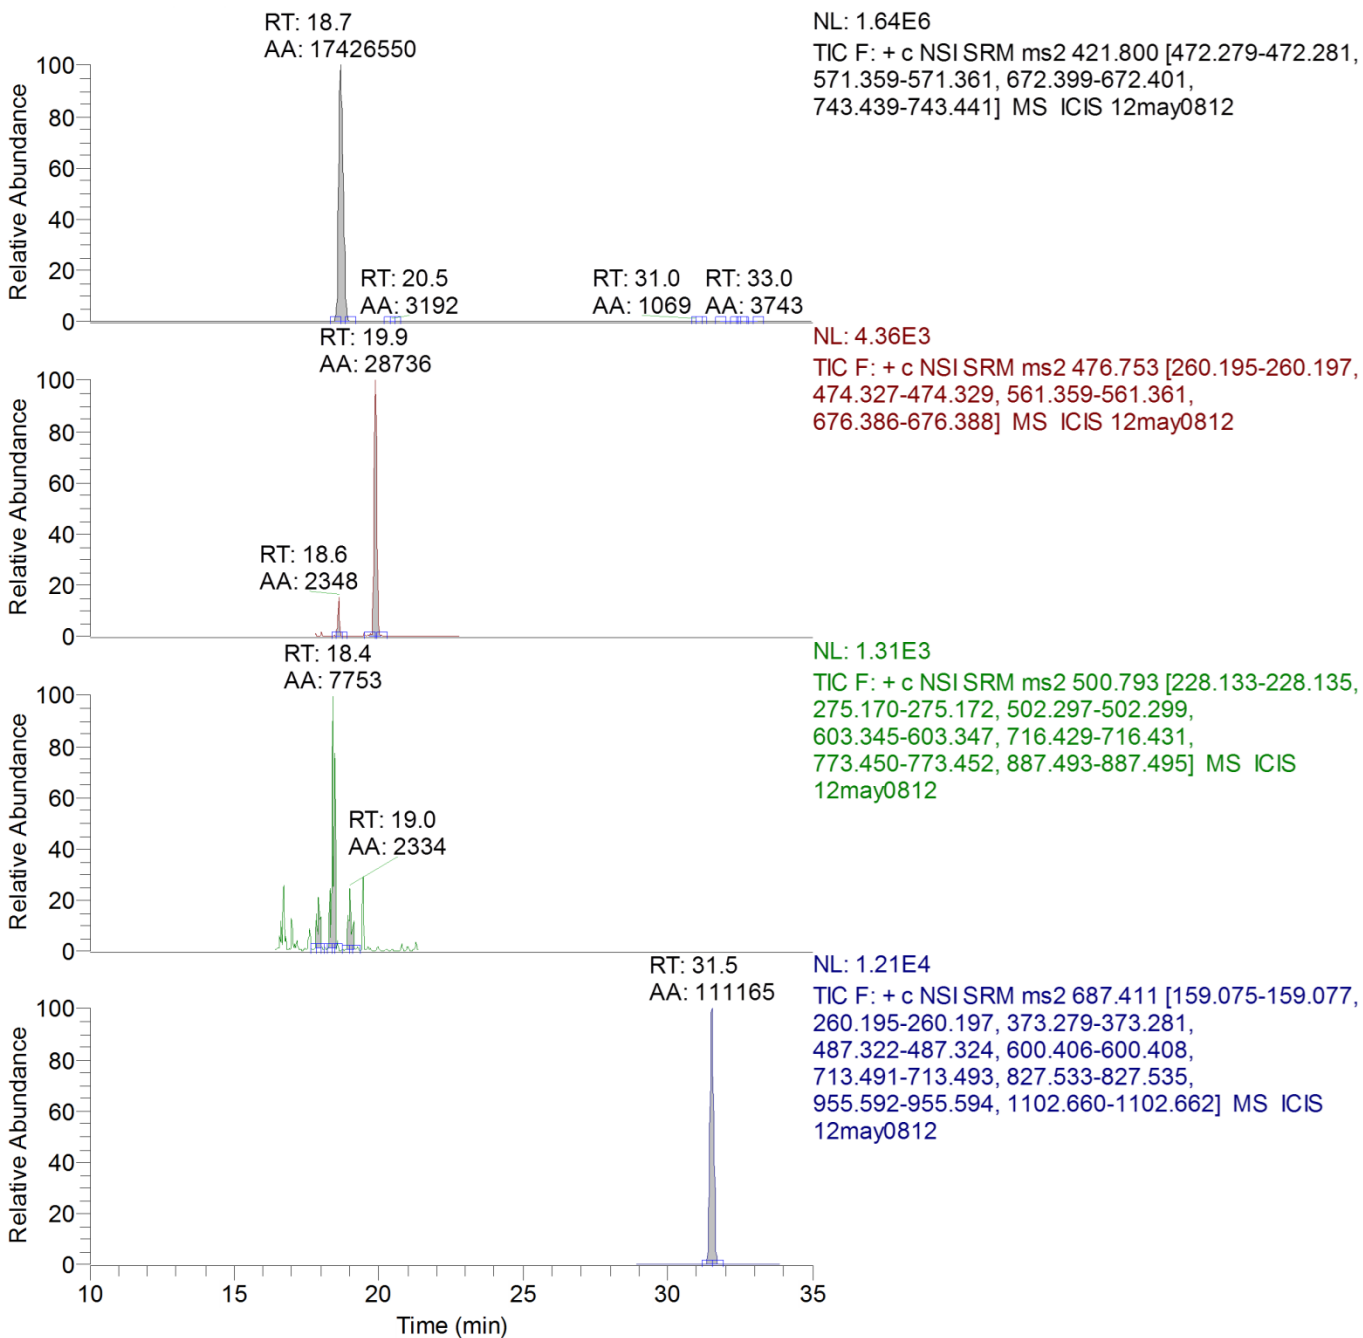

# OKP1

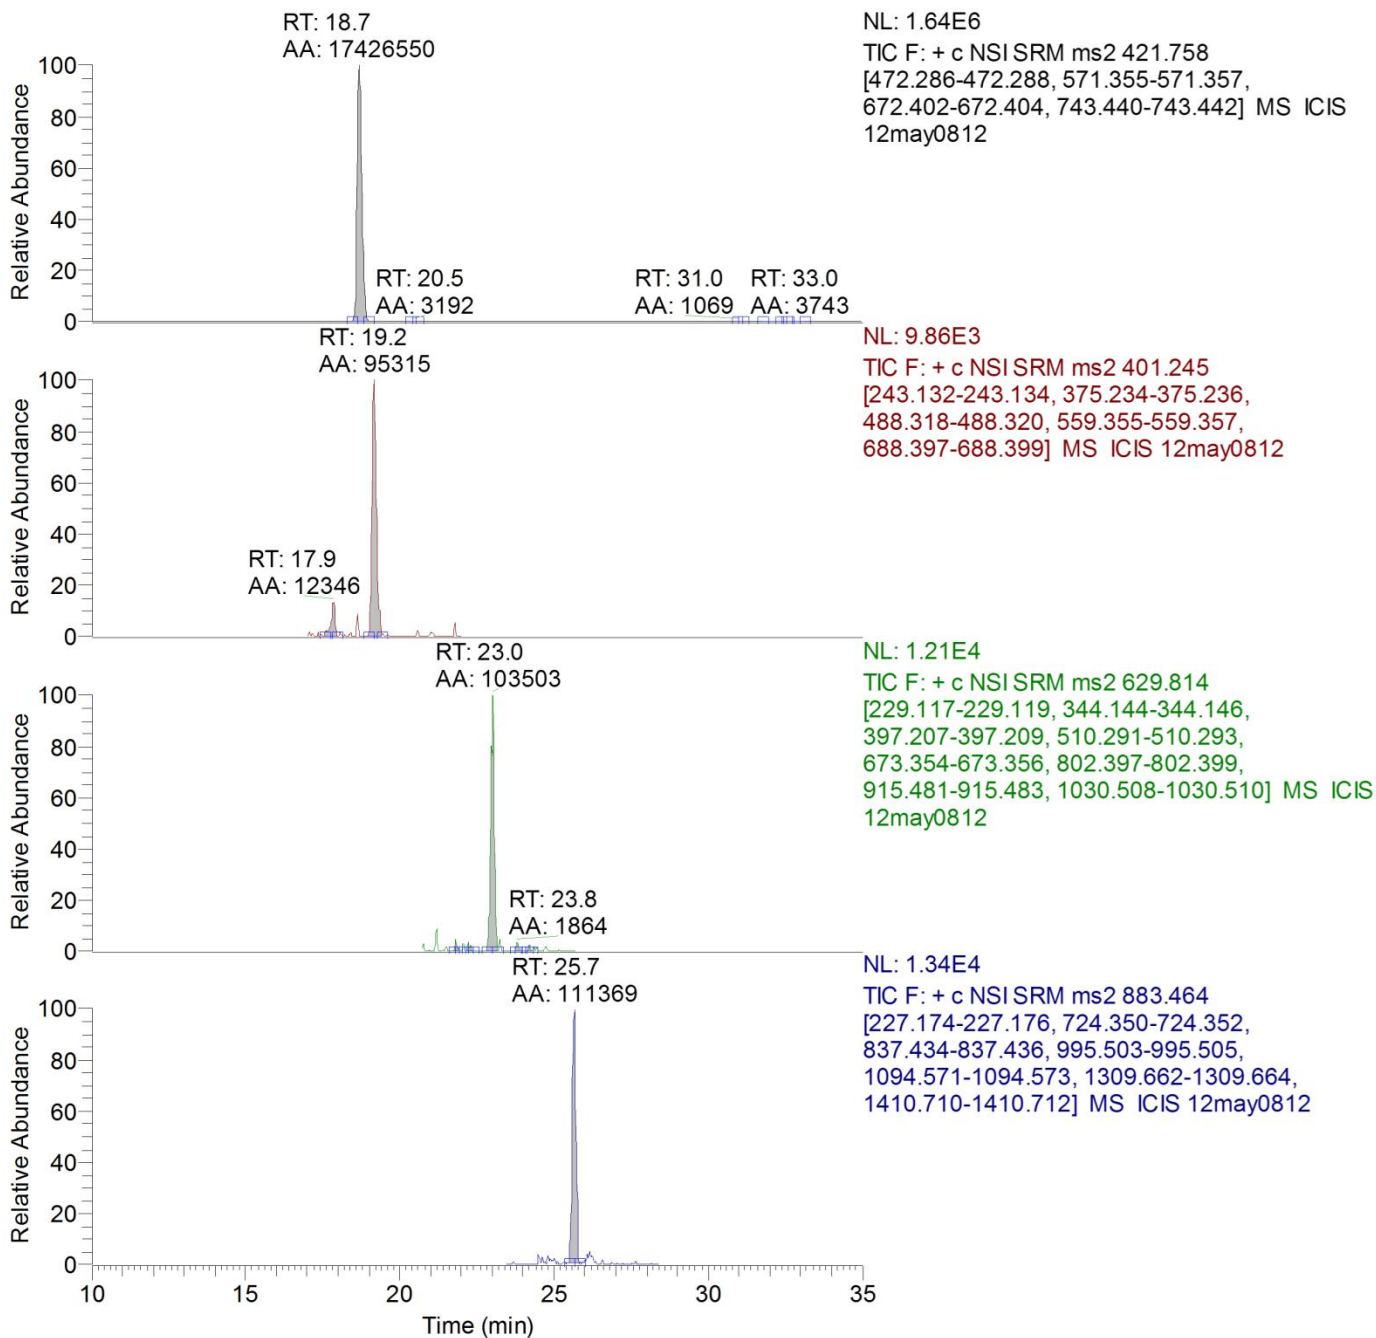



# AME1

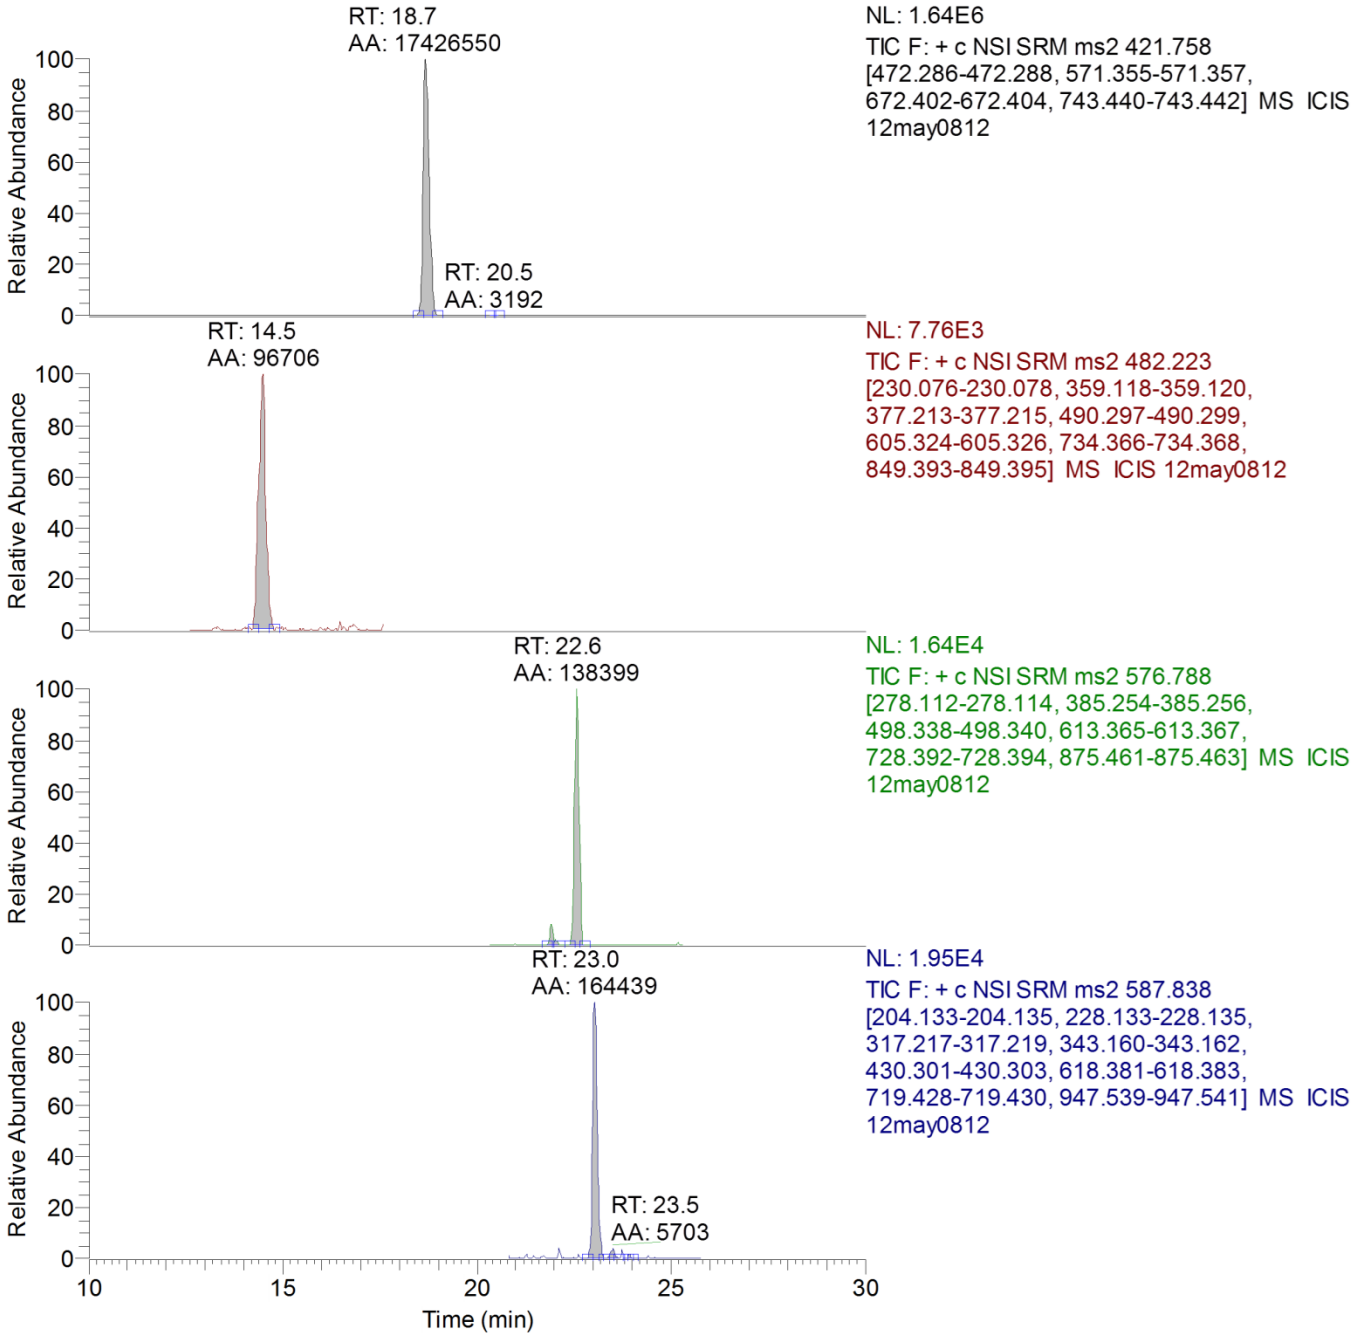

# MCM21

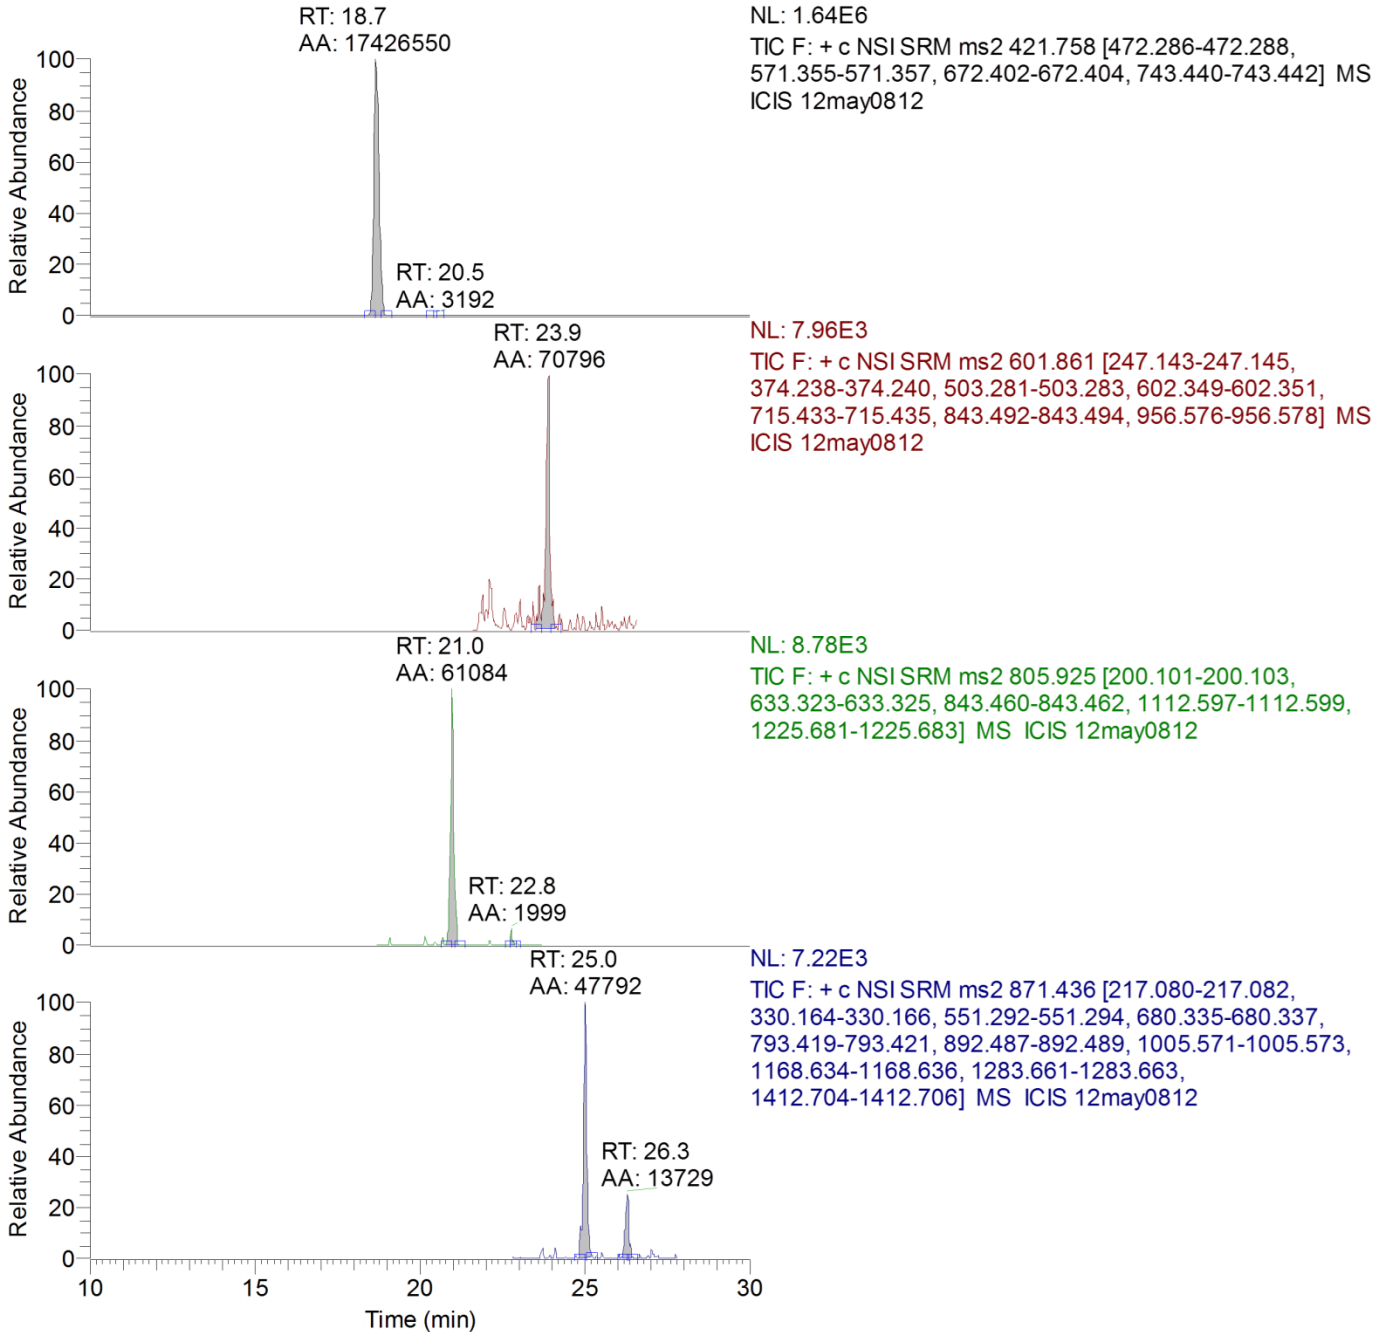

# MCM19

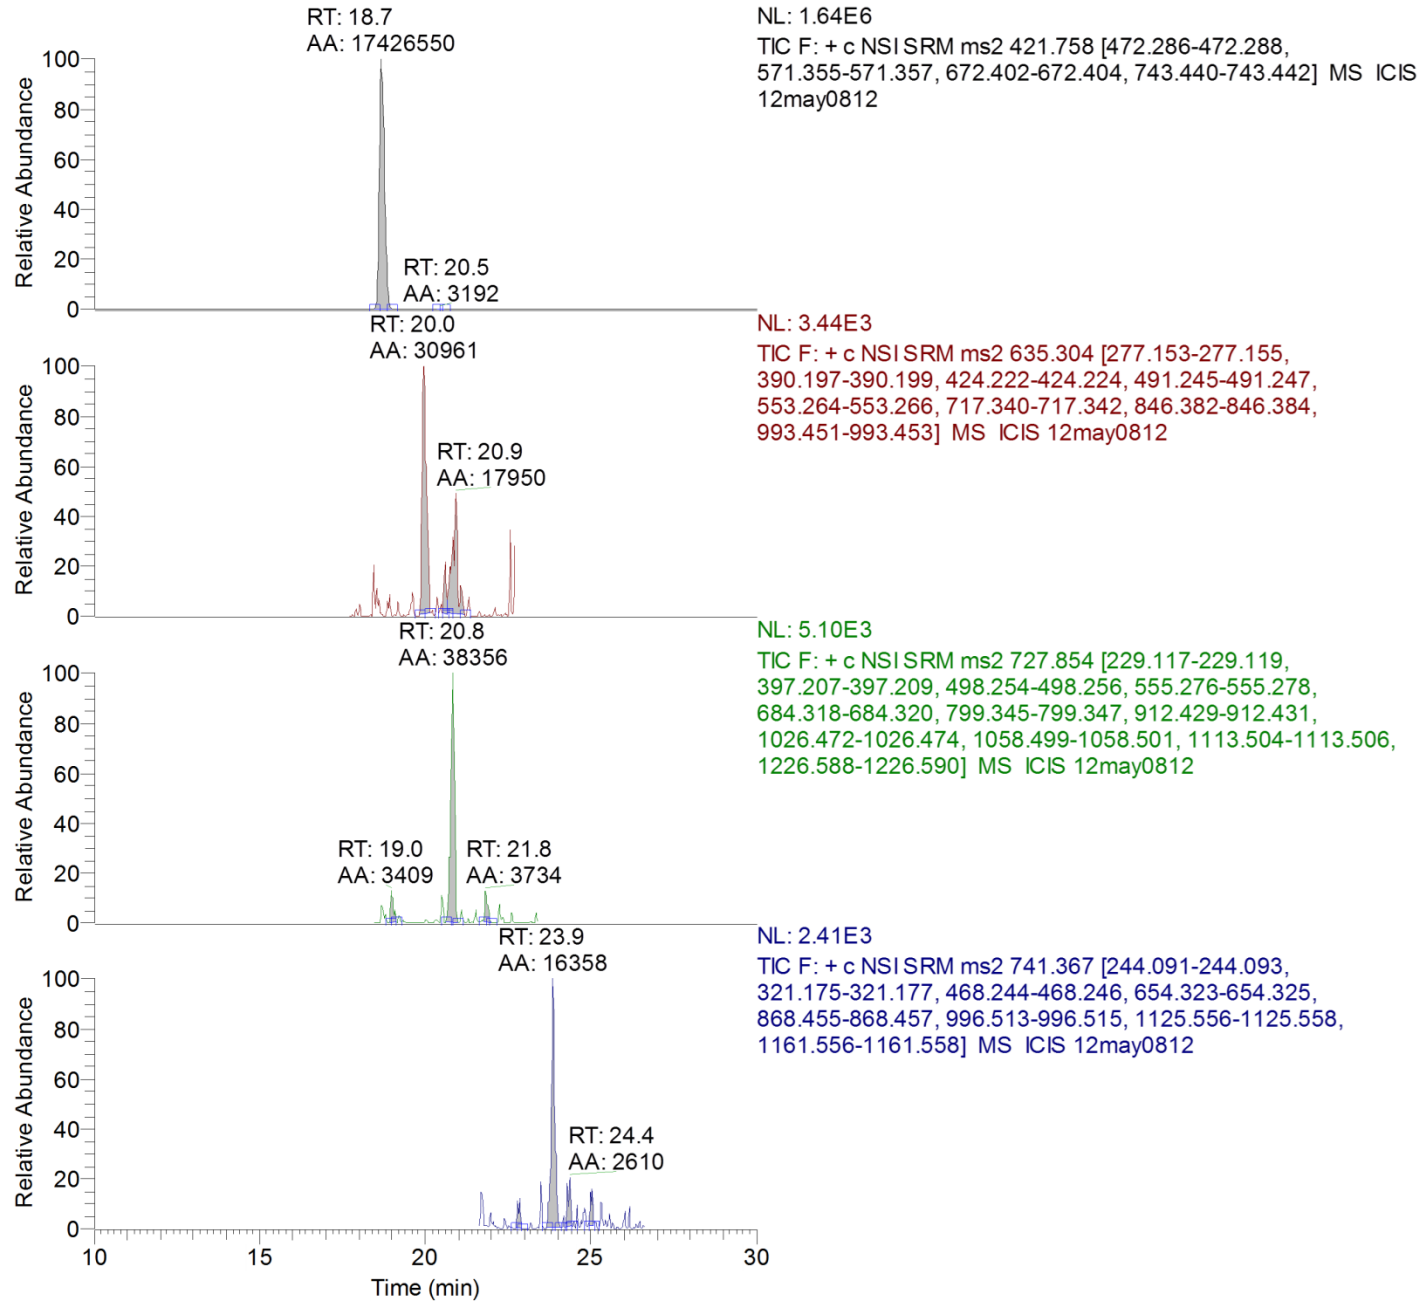

# CTF3

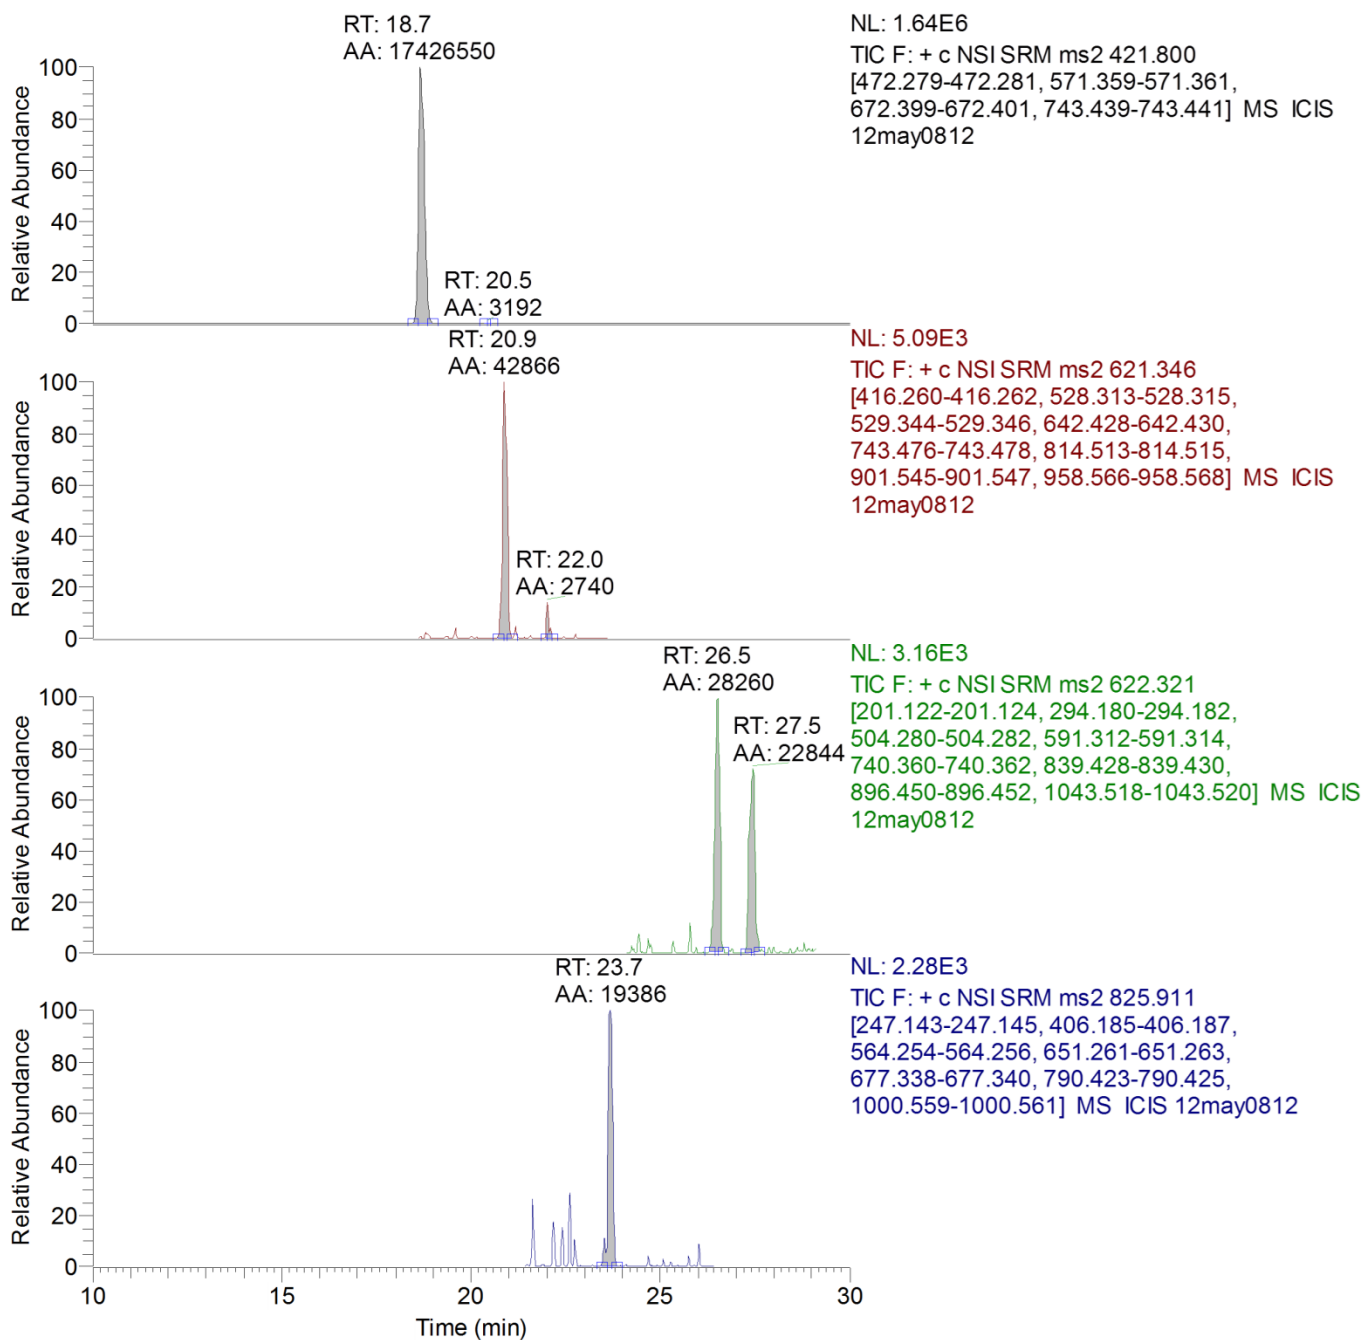

# NKP1

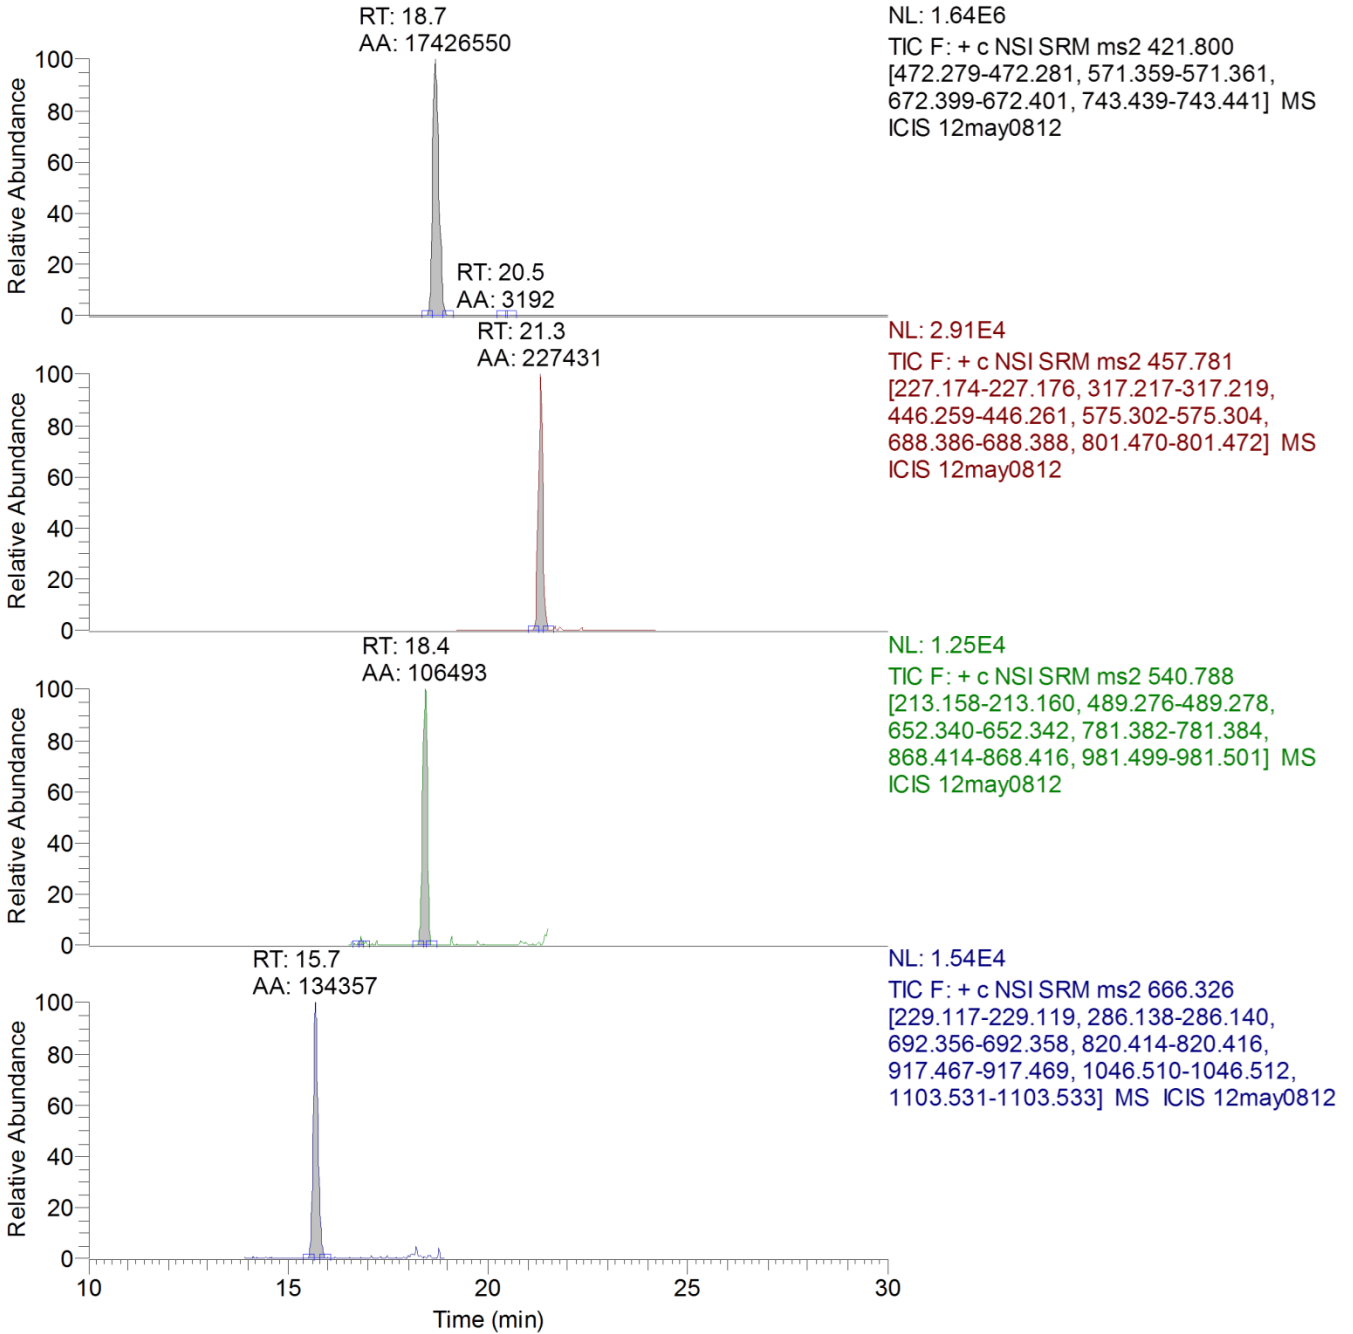

# NKP2

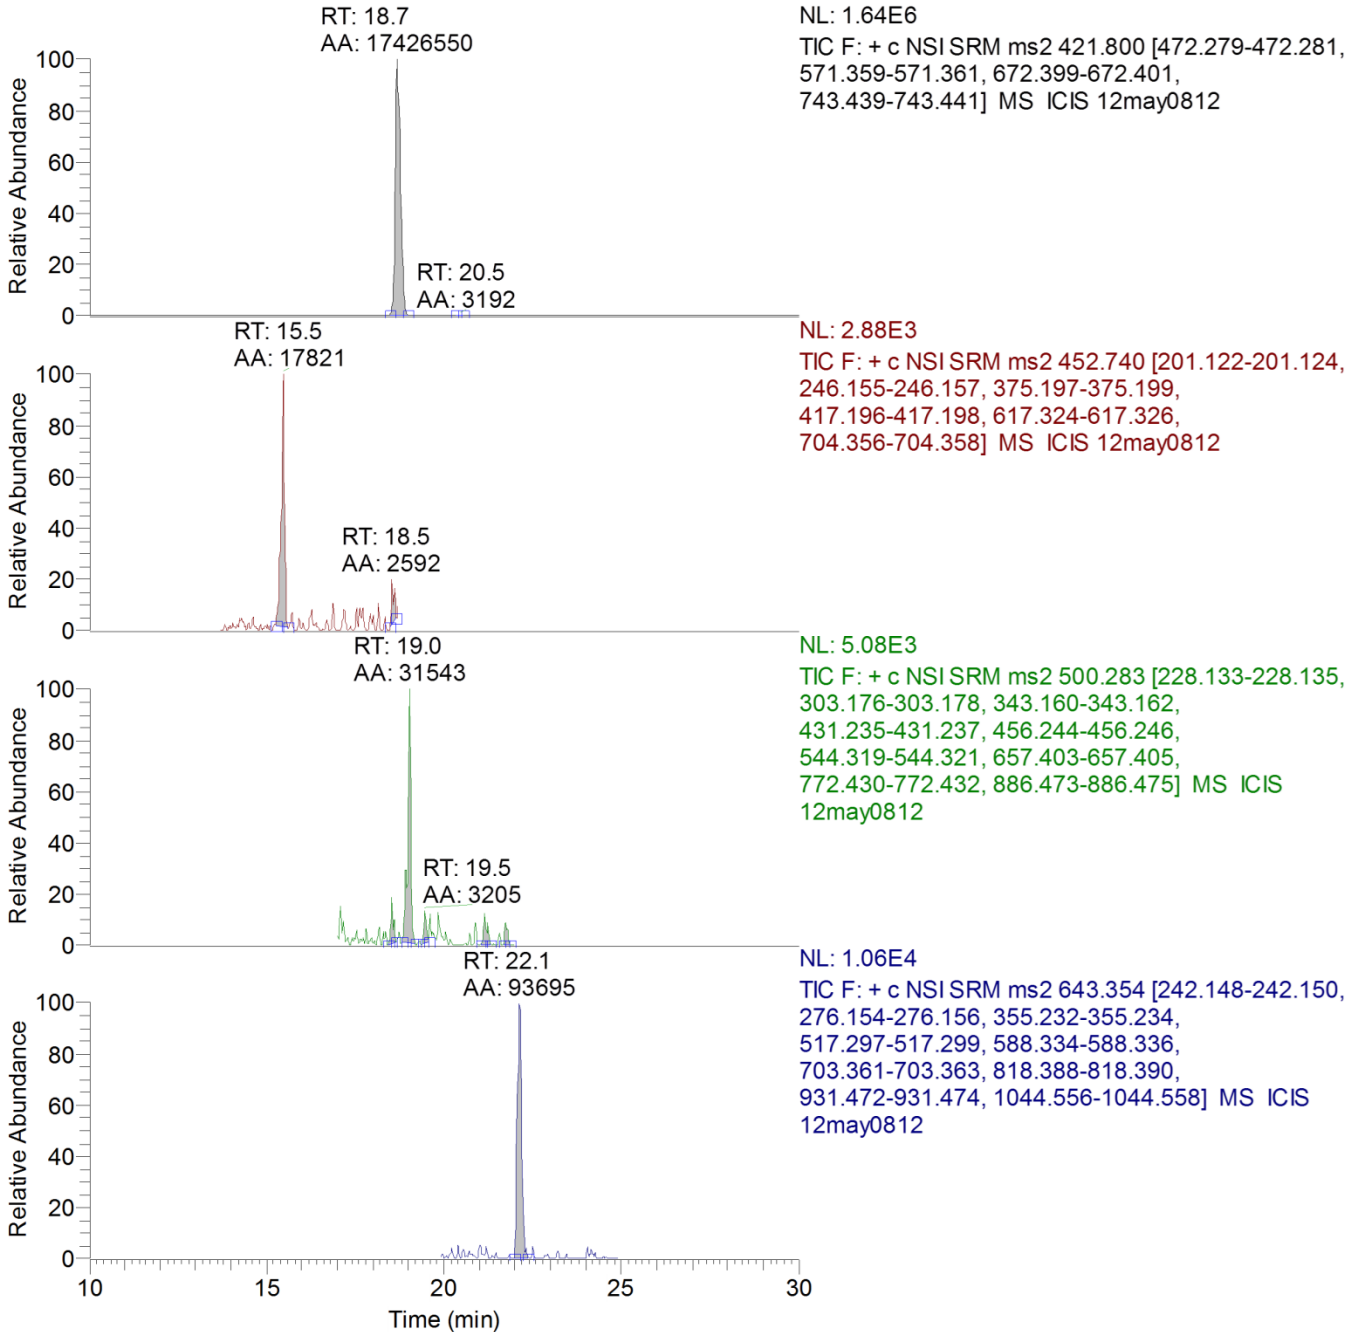

# CHL4

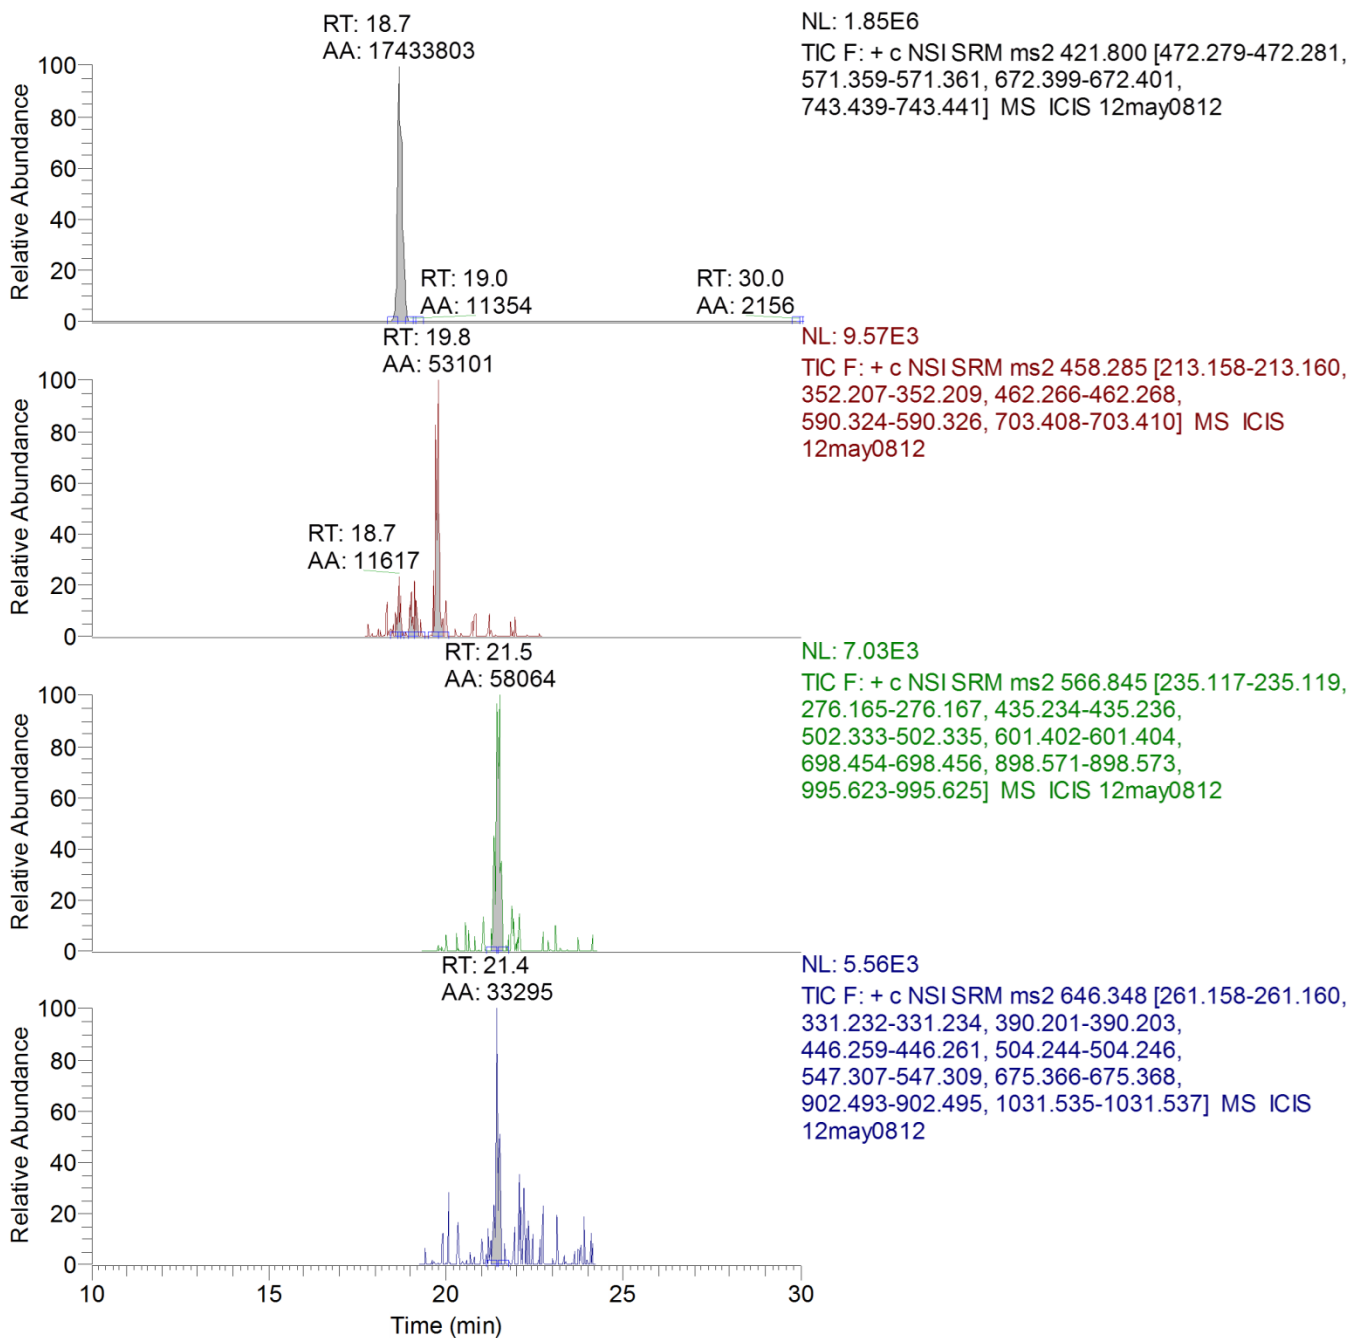

**Figure S4.** Representative chromatograms for each yeast kinetochore peptide detected in these analyses. For each protein, four chromatograms are shown. The top chromatogram is the trypsin peptide VATVSLPR that is used as a common marker in all analyses. The subsequent three chromatograms show the selective detection of the three peptides used to measure each kinetochore protein. The response for each protein is the sum of the integrated peak area, denoted AA in the chromatograms, for the three peptides that are monitored.

Abbreviations in these chromatograms

RT: – the retention time for the chromatographic peak

AA: – the automatically integrated peak area

NL: – normalized, the value used for data normalization in that chromatogram

TIC: – total ion current, the ion intensity for all fragment ions is used

F: + c NSI SRM ms2 – details of the data filtering to use positive ions in the centroid mode from nanospray ionization in a selected reaction monitoring tandem mass spectrometry experiment

MS ICIS: – a mass spectrometry experiment with the peak area measured using the Interactive Chemical Information System peak detection and integration algorithm



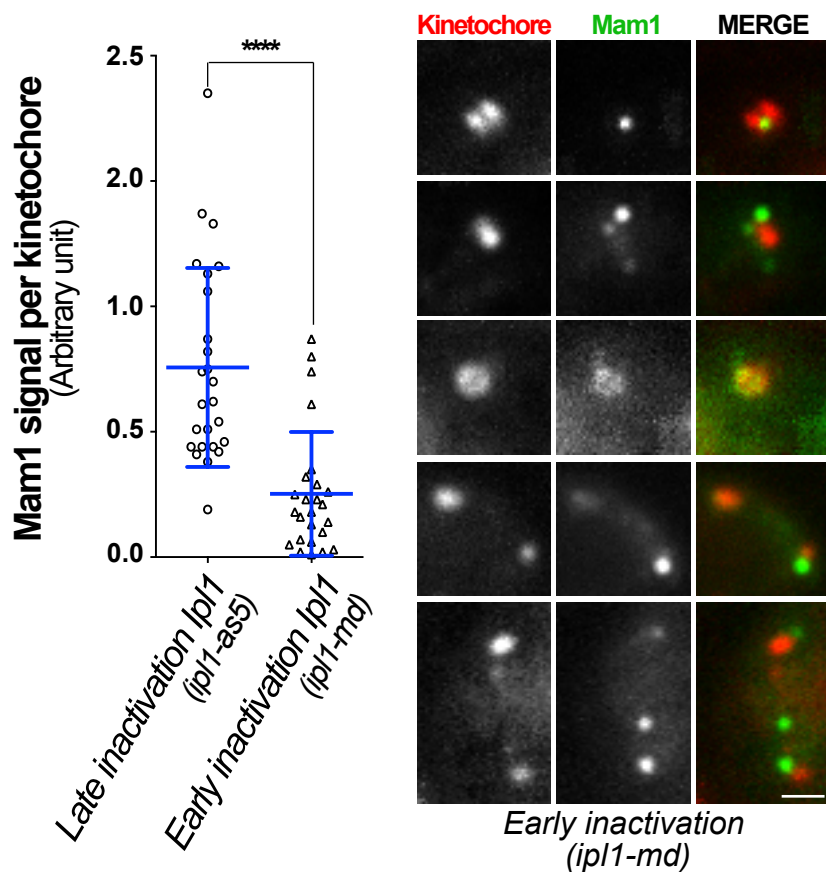

**Figure S5.** Quantifying the Mam1 signal at kinetochores in *ipl1* mutants. *ipl1-md*, and *ipl1-as5/ipl1-md* (*ipl1-as5*) diploid cells expressing Mam1-GFP and Mtw1-3xmCherry were switched to sporulation medium and released from a pachytene arrest ( $P_{GAL1-NDT80}$   $GAL4-ER$ ) at 4.5 hours by the addition of 5  $\mu$ M  $\beta$ -estradiol. *Ipl1-as5* was inhibited by the addition of 50  $\mu$ M 1NA-PP1 at the time of the release. As in Supplemental Figure S1, we defined the area around the kinetochores and measured the total signal in this area in the Mam1 channel (GFP) (A). We corrected for background by subtracting the signal in the GFP channel in an equivalently-sized close area (B). This value was divided by the corrected signal in the kinetochore channel (mCherry) for the same area (C minus D). Using this formula, we scored, for each cell ( $n \geq 25$ ), the relative amount of Mam1 per kinetochore between the early inactivation of *Ipl1* (using *ipl1-md* mutant) and late inactivation (using *ipl1-as5* with 1NA-PP1 inhibitor) at 150mn after the release. Graph shows values of individual cells, average, and one standard deviation. The student's t-test was used to evaluate the significance of observed differences. \*\*\*\* $p < 0.0001$ . The panel on the right shows representative images of Mam1-GFP patterns observed in *ipl1-md* cells. Note that these mutant cells frequently feature one or more bright foci of Mam1 signal that is not co-localized with kinetochores. Scale bar, 1 $\mu$ m.

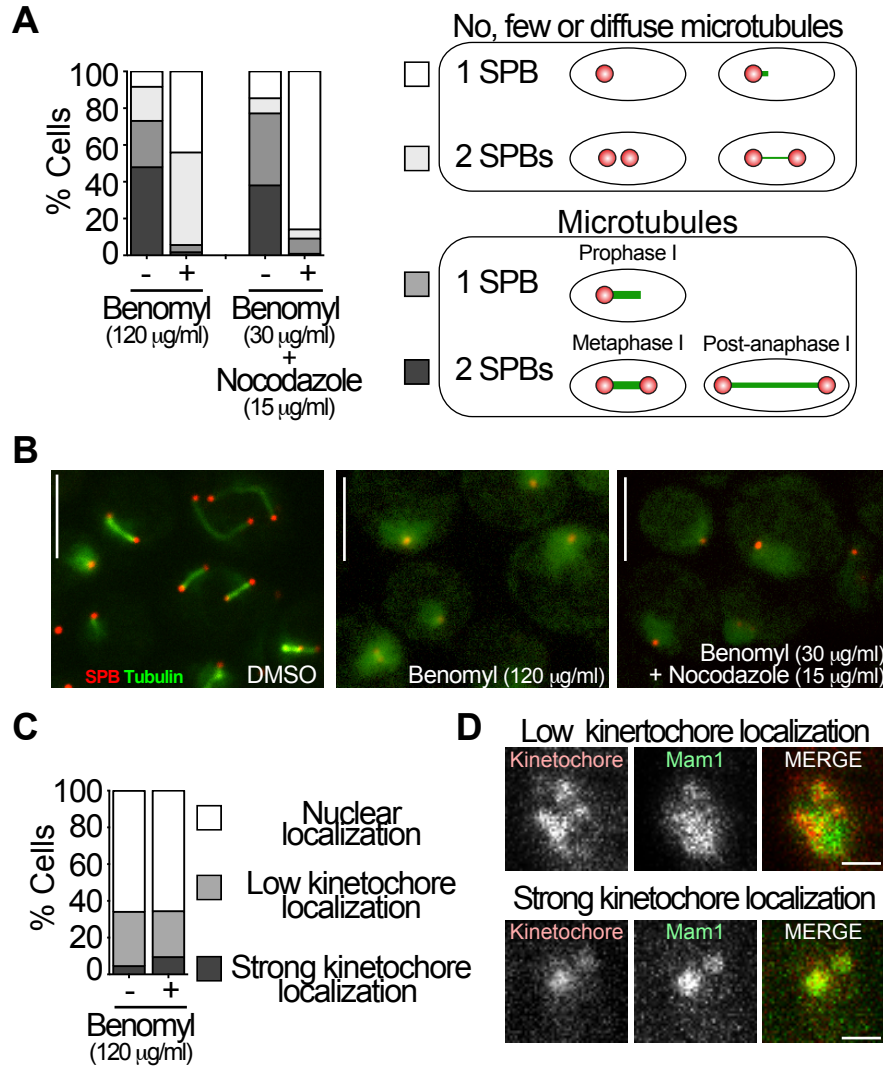

**Figure S6.** Effect of benomyl and nocodazole on microtubule dynamics and monopolin loading. (A-B) Wild-type diploid cells carrying SPB (Spc42-DsRed) and spindle (Tub1-GFP) markers were sporulated and released from a pachytene arrest ( $P_{GALI-NDT80} GAL4-ER$ ) at 6 hours by the addition of 5  $\mu$ M  $\beta$ -estradiol. Cells were scored according to Tubulin-GFP distribution as shown in (B) with either no or diffuse staining of Tub1-GFP with one (white) or two SPBs (light grey), or with strong staining of Tub1-GFP with one (medium grey) or two SPBs (dark grey). Benomyl (30  $\mu$ g/ml) and nocodazole (15  $\mu$ g/ml) were added to the cells at the time of release. Scale bars = 5  $\mu$ m. (C) *ipl1-md* diploid cells carrying Mam1-GFP and Mtw1-3xmCherry were sporulated and released from a pachytene arrest ( $P_{GALI-NDT80} GAL4-ER$ ) at 6 hours by the addition of 5  $\mu$ M  $\beta$ -estradiol. The protocol is summarized in Figure 6A. T=0 represents the time when cells were released from the arrest. Benomyl (120 $\mu$ g/ml) was added to the cells at the time of release. Cells were categorized according to Mam1-GFP distribution as shown in Figure 6E. (D) Representative cells for Figure 7B with low and strong kinetochore localization of Mam1-GFP in diploid cells are shown. Scale bars = 1  $\mu$ m.

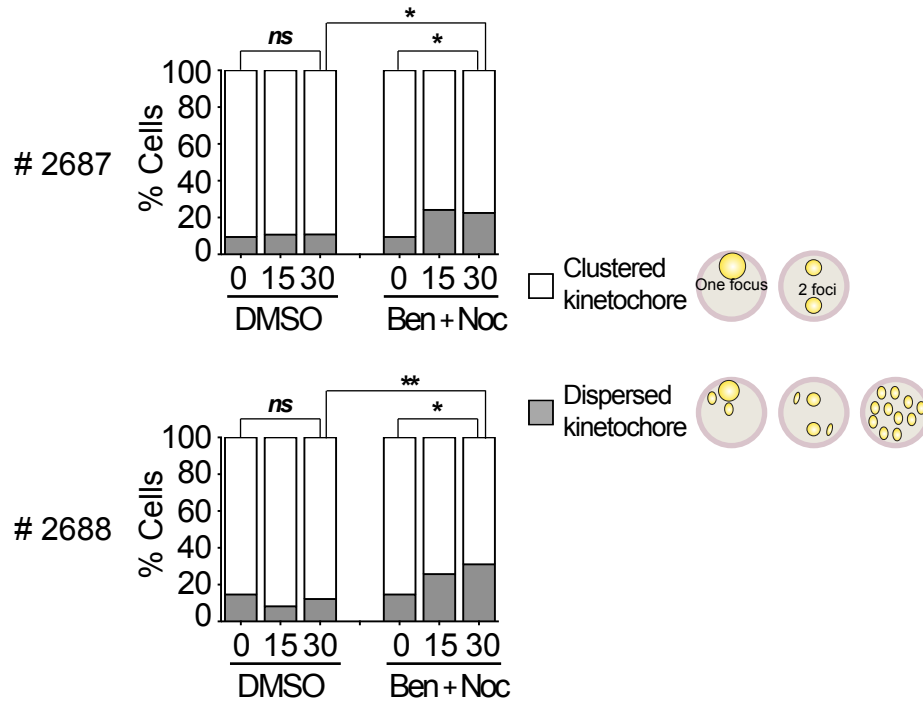

**Figure S7.** Effect of benomyl and nocodazole on kinetochore release in *ip11* cells. *ip11-md* diploid cells expressing Ndc80-GFP and Mtw1-3xmCherry were switched to sporulation medium. The strains used were *ndt80* mutants that arrest in pachytene. DMSO or benomyl (30  $\mu\text{g/ml}$ ) and nocodazole (15  $\mu\text{g/ml}$ ) were added to the cells 6 hours after induction of meiosis (T=0). Using the Mtw1-3xmCherry signal, cells were scored as having clustered kinetochores (< 3 kinetochore foci, white box) or dispersed kinetochores ( $\geq$  3 kinetochore foci, dark grey box). Two zygotes (DRM2687 and DRM2688) were used. ( $n \geq 50$  per time-point). Fisher's exact tests were used to evaluate the significance of observed differences. \* $p < 0.05$ , \*\* $p < 0.01$ .

**Table S1: Diploid strain list**

| Diploid       | Parents strain | Figure                                              |
|---------------|----------------|-----------------------------------------------------|
| DRM1845       | X454 * Y421    | Fig1A                                               |
| DRM1846       | X455 * Y422    | Fig1A                                               |
| DRM1811       | X1679 * Y1599  | Fig1B-E, Fig3E “Ndc80”, FigS1                       |
| DRM1812       | X1680 * Y1600  | Fig1B-E, Fig3E “Ndc80”                              |
| DRM2431       | X1460 * Y1425  | Fig1F                                               |
| DRM1839       | X1475 * Y1439  | Fig2B “Mif2-GFP”, FigS2B “Mif2”                     |
| DRM1840       | X1476 * Y1440  | Fig2B “Mif2-GFP”, FigS2B “Mif2”                     |
| DRM1841       | X1477 * Y1441  | Fig2B “Ndc10-GFP”, FigS2B “Ndc10”                   |
| DRM1842       | X1478 * Y1442  | Fig2B “Ndc10-GFP”, FigS2B “Ndc10”                   |
| DRM1843       | X2001 * Y1789  | Fig2B “Cnn1-GFP”, FigS2B “Cnn1”                     |
| DRM1844       | X2002 * Y1790  | Fig2B “Cnn1-GFP”, FigS2B “Cnn1”                     |
| DHC164 (3x)   | X1447 * Y1420  | Fig2D-E, Fig3A-B, D                                 |
| DRM1833       | X1469 * Y1433  | Fig2D “Ctf19-GFP”, FigS2B “Ctf19”                   |
| DRM1834       | X1470 * Y1434  | Fig2D “Ctf19-GFP”, FigS2B “Ctf19”                   |
| DRM1837       | X1473 * Y1437  | Fig2E “Ctf3-GFP”, FigS2B “Ctf3”                     |
| DRM1838       | X1474 * Y1438  | Fig2E “Ctf3-GFP”, FigS2B “Ctf3”                     |
| DRM1829       | X1365 * Y1339  | Fig3A “Dsn1-GFP”, Fig3F “Dsn1”, FigS2B “Dsn1”       |
| DRM1830       | X1366 * Y1340  | Fig3A “Dsn1-GFP”, Fig3F “Dsn1”, FigS2B “Dsn1”       |
| DRM2291, 2323 | X1957 * Y1763  | Fig3A “Nsl1-GFP”, Fig3F “Nsl1”, FigS2B “Nsl1”       |
| DRM2292, 2324 | X1958 * Y1764  | Fig3A “Nsl1-GFP”, Fig3F “Nsl1”, FigS2B “Nsl1”       |
| DRM1825       | X1363 * Y1337  | Fig3B “Spc105-GFP”, Fig3F “Spc105”, FigS2B “Spc105” |
| DRM1826       | X1364 * Y1338  | Fig3B “Spc105-GFP”, Fig3F “Spc105”, FigS2B “Spc105” |
| DRM1831       | X1367 * Y1341  | Fig3C “Spc24-GFP”                                   |
| DRM1832       | X1368 * Y1342  | Fig3C “Spc24-GFP”                                   |
| DRM2295, 2327 | X1959 * Y1765  | Fig3C “Nuf2-GFP”, Fig3F “Nuf2”, FigS2B “Nuf2”       |
| DRM2296, 2328 | X1960 * Y1766  | Fig3C “Nuf2-GFP”, Fig3F “Nuf2”, FigS2B “Nuf2”       |
| DRM1821       | X1335 * Y1275  | Fig3C “Ndc80-GFP”, FigS2B “Ndc80”                   |
| DRM1822       | X1336 * Y1276  | Fig3C “Ndc80-GFP”, FigS2B “Ndc80”                   |
| DRM2395       | X873 * Y1763   | Fig3D “Nsl1”                                        |
| DRM2396       | X874 * Y1764   | Fig3D “Nsl1”                                        |
| DRM2397       | X873 * Y1599   | Fig3D “Ndc80”                                       |
| DRM2398       | X874 * Y1600   | Fig3D “Ndc80”                                       |
| DRM2399       | X873 * Y1765   | Fig3D “Nuf2”                                        |
| DRM2400       | X874 * Y1766   | Fig3D “Nuf2”                                        |
| DRM2401       | X873 * Y1757   | Fig3D “Spc24”                                       |
| DRM2402       | X874 * Y1758   | Fig3D “Spc24”                                       |
| DRM2403       | X873 * Y1783   | Fig3D “Spc25”                                       |
| DRM2404       | X874 * Y1784   | Fig3D “Spc25”                                       |
| DRM1823       | X1355 * Y1335  | Fig3E “Dam1-GFP”, Fig3F “Dam1”, FigS2B “Dam1”       |
| DRM1824       | X1356 * Y1336  | Fig3E “Dam1-GFP”, Fig3F “Dam1”, FigS2B “Dam1”       |
| DRM2297, 2329 | X1955 * Y1757  | Fig3F “Spc24”, FigS2B “Spc24”                       |
| DRM2298, 2330 | X1956 * Y1758  | Fig3F “Spc24”, FigS2B “Spc24”                       |
| DRM1849       | X2080 * Y1859  | Fig4A “ <i>cdc28-as1</i> ”                          |
| DRM1850       | X2081 * Y1859  | Fig4A “ <i>cdc28-as1</i> ”                          |

| Diploid                                                 | Parents strain | Figure                                                                                    |
|---------------------------------------------------------|----------------|-------------------------------------------------------------------------------------------|
| DCH1801                                                 | X1531 * Y1492  | Fig4B “ <i>ndt80 cdc28-as1</i> ”                                                          |
| DCH1802                                                 | X1706 * Y1494  | Fig4B “ <i>ndt80 cdc28-as1</i> ”                                                          |
| DRM1005                                                 | X871 * Y909    | Fig4C “ <i>WT</i> ”                                                                       |
| DRM1006                                                 | X872 * Y910    | Fig4C “ <i>WT</i> ”                                                                       |
| DRM2447                                                 | X2151 * Y1921  | Fig4C “ <i>cdc6-md</i> ”                                                                  |
| DRM2448                                                 | X2152 * Y1922  | Fig4C “ <i>cdc6-md</i> ”                                                                  |
| DRM2319                                                 | X1217 * Y1192  | Fig4D “ <i>WT</i> ”                                                                       |
| DRM2320                                                 | X1218 * Y1192  | Fig4D “ <i>WT</i> ”                                                                       |
| DRM2321                                                 | X2019 * Y1799  | Fig4D “ <i>cdc6-md</i> ”                                                                  |
| DRM2322                                                 | X2020 * Y1800  | Fig4D “ <i>cdc6-md</i> ”                                                                  |
| DRM1817                                                 | X1519 * Y1471  | Fig5A “ <i>WT</i> ”                                                                       |
| DRM1818                                                 | X1520 * Y1472  | Fig5A “ <i>WT</i> ”                                                                       |
| DRM1783                                                 | X1589 * Y1511  | Fig5A “ <i>ipl1-md</i> ”                                                                  |
| DRM1784                                                 | X1590 * Y1514  | Fig5A “ <i>ipl1-md</i> ”                                                                  |
| DRM2432                                                 | X2120 * Y1426  | Fig5B “ <i>ipl1-md</i> ”                                                                  |
| DCH1793                                                 | X1611 * Y1529  | Fig5C “ <i>WT</i> ”                                                                       |
| DCH1794                                                 | X1612 * Y1530  | Fig5C “ <i>WT</i> ”                                                                       |
| DCH1795                                                 | X1609 * Y1527  | Fig5C “ <i>ipl1-md</i> ”                                                                  |
| DCH1796                                                 | X1610 * Y1528  | Fig5C “ <i>ipl1-md</i> ”                                                                  |
| DCH1789                                                 | X1603 * Y1521  | Fig5D “ <i>WT</i> ”                                                                       |
| DCH1790                                                 | X1604 * Y1522  | Fig5D “ <i>WT</i> ”                                                                       |
| DCH1791                                                 | X1601 * Y1519  | Fig5D “ <i>ipl1-md</i> ”                                                                  |
| DCH1792                                                 | X1602 * Y1520  | Fig5D “ <i>ipl1-md</i> ”                                                                  |
| DHC197 (3x),<br>DHC266 (2x),<br>DHC268 (2x),<br>DRM1903 | X1446 * Y1419  | Fig5E “ <i>WT</i> ”<br>Fig5E “ <i>WT</i> ”<br>Fig5E “ <i>WT</i> ”<br>FigS2A “Dsn1-3xFLAG” |
| DHC200 (3x),<br>DHC267 (2x)                             | X1571 * Y1500  | Fig5E “ <i>ipl1-md</i> ”<br>Fig5E “ <i>ipl1-md</i> ”                                      |
| DRM2433                                                 | X1675 * Y1583  | Fig6B-C “ <i>WT</i> ”                                                                     |
| DRM2435                                                 | X1691 * Y1586  | Fig6D-E “ <i>ipl1-md</i> ”                                                                |
| DRM2437                                                 | X1691 * Y1582  | Fig6D-E “ <i>ipl1-as5/ipl1-md</i> ”                                                       |
| DRM2438                                                 | X1692 * Y1582  | Fig6D-E “ <i>ipl1-as5/ipl1-md</i> ”                                                       |
| DRM2557,<br>DRM2611                                     | X1673 * Y1585  | Fig7A-B, FigS5 “ <i>ipl1-md</i> ”, FigS6C “ <i>ipl1-md</i> ”                              |
| DRM2558,<br>DRM2612                                     | X1674 * Y1586  | Fig7A-B, FigS5 “ <i>ipl1-md</i> ”, FigS6C “ <i>ipl1-md</i> ”                              |
| DRM2589                                                 | X2289 * Y2133  | Fig7B “ <i>ndc80-md</i> ”                                                                 |
| DRM2590                                                 | X2290 * Y2134  | Fig7B “ <i>ndc80-md</i> ”                                                                 |
| DRM2591                                                 | X2287 * Y2131  | Fig7B, FigS6D “ <i>ipl1-md ndc80-md</i> ”                                                 |
| DRM2592                                                 | X2298 * Y2132  | Fig7B, FigS6D “ <i>ipl1-md ndc80-md</i> ”                                                 |
| DRM2687                                                 | X1677 * Y2119  | Fig7C “ <i>ndt80 ipl1-md</i> ”, FigS7                                                     |
| DRM2688                                                 | X1678 * Y2120  | Fig7C “ <i>ndt80 ipl1-md</i> ”, FigS7                                                     |
| DRM2303                                                 | X2047 * Y1477  | FigS2A “Dam1-GFP”                                                                         |
| DRM2304                                                 | X2048 * Y1478  | FigS2A “Dam1-GFP”                                                                         |
| DRM2228                                                 | X1294 * Y1192  | FigS2A “Ndc80-GFP”                                                                        |

| Diploid | Parents strain | Figure                    |
|---------|----------------|---------------------------|
| DRM2287 | X1999 * Y1787  | FigS2A “Nuf2-GFP”         |
| DRM2288 | X2000 * Y1788  | FigS2A “Nuf2-GFP”         |
| DRM2243 | X2005 * Y1481  | FigS2A “Spc24-GFP”        |
| DRM2244 | X2006 * Y1482  | FigS2A “Spc24-GFP”        |
| DRM2245 | X2007 * Y1479  | FigS2A “Spc105-GFP”       |
| DRM2246 | X2008 * Y1480  | FigS2A “Spc105-GFP”       |
| DRM2459 | X2046 * Y1475  | FigS2A “Mam1-GFP”         |
| DRM2285 | X1997 * Y1785  | FigS2A “Nsl1-GFP”         |
| DRM2286 | X1998 * Y1786  | FigS2A “Nsl1-GFP”         |
| DRM2247 | X2009 * Y1473  | FigS2A “Dsn1-GFP”         |
| DRM2237 | X1287 * Y1279  | FigS2A “Mtw1-RFP”         |
| DRM2238 | X1288 * Y1280  | FigS2A “Mtw1-RFP”         |
| DRM2263 | X454 * Y399    | FigS2A “Mtw1-GFP”         |
| DRM2264 | X455 * Y400    | FigS2A “Mtw1-GFP”         |
| DRM2317 | X2049 * Y1815  | FigS2A “Ctf19-GFP”        |
| DRM2318 | X2050 * Y1816  | FigS2A “Ctf19-GFP”        |
| DRM2305 | X2051 * Y1817  | FigS2A “Chl4-GFP”         |
| DRM2306 | X2052 * Y1818  | FigS2A “Chl4-GFP”         |
| DRM2307 | X2053 * Y1819  | FigS2A “Ctf3-GFP”         |
| DRM2308 | X2054 * Y1820  | FigS2A “Ctf3-GFP”         |
| DRM2225 | X1907 * Y1731  | FigS2A “Cnn1-GFP”         |
| DRM2226 | X1908 * Y1732  | FigS2A “Cnn1-GFP”         |
| DRM2331 | X2055 * Y1823  | FigS2A “Ndc10-GFP”        |
| DRM2332 | X2056 * Y1824  | FigS2A “Ndc10-GFP”        |
| DRM2333 | Y1821 * Y1822  | FigS2A “Mif2-GFP”         |
| DRM00   | X55 * Y8       | FigS2A “Control”          |
| DRM2343 | X55 * Y169     | FigS2A “Control”          |
| DRM2344 | X206 * Y170    | FigS2A “Control”          |
| DRM1835 | X1471 * Y1435  | FigS2B “Chl4”             |
| DRM1836 | X1472 * Y1436  | FigS2B “Chl4”             |
| DRM2729 | X1673 * Y1581  | FigS5 “ <i>ipl1-as5</i> ” |
| DRM2730 | X1674 * Y1582  | FigS5 “ <i>ipl1-as5</i> ” |
| DRM2561 | X1581 * Y1507  | FigS6A-B                  |
| DRM2562 | X1582 * Y1508  | FigS6A-B                  |

**Table S2: Haploid strain list**

|       |                                                                                                                                                                                                      |
|-------|------------------------------------------------------------------------------------------------------------------------------------------------------------------------------------------------------|
| X454  | MAT $\alpha$ , ura3-13, trp1- $\Delta$ 63, leu2-?, tyr1-1, lys2-1, met13-d, can1-R, his3- $\Delta$ 1, MTW1-GFP-URA3                                                                                  |
| Y421  | MAT $\alpha$ , leu2, lys2-2, tyr1-2, met13-c, ura3-1, trp1- $\Delta$ 63, cyh2-1, his3- $\Delta$ 1, MTW1-GFP-URA3, SPC42-[MDE1145: URA3 SPC42-DSRed]                                                  |
| X455  | MAT $\alpha$ , ura3-13, trp1- $\Delta$ 63, leu2-?, tyr1-1, lys2-1, met13-d, can1-R, his3- $\Delta$ 1, MTW1-GFP-URA3                                                                                  |
| Y422  | MAT $\alpha$ , leu2, lys2-2, tyr1-2, met13-c, ura3-1, trp1- $\Delta$ 63, cyh2-1, his3- $\Delta$ 1, MTW1-GFP-URA3, SPC42-[MDE1145: URA3 SPC42-DSRed]                                                  |
| X1679 | MAT $\alpha$ , trp1- $\Delta$ 63, his3- $\Delta$ 1, leu2, met13-d, tyr1-1, lys2-1, can1-R, MTW1-3xmCherry-hphNT1, ura3::pKB80 [PGPD1-GAL4(848)-ER-URA3::hphNT1], natNT2-PGAL1-NDT80, NDC80-EGFP-TRP1 |
| Y1599 | MAT $\alpha$ , leu2, lys2-2, tyr1-2, met13-c, ura3-1, trp1- $\Delta$ 63, cyh2-1, his3- $\Delta$ 1, natNT2-PGAL1-NDT80, MTW1-3xmCherry-hphNT1, NDC80-EGFP-TRP1                                        |
| X1680 | MAT $\alpha$ , trp1- $\Delta$ 63, his3- $\Delta$ 1, leu2, met13-d, tyr1-1, lys2-1, can1-R, MTW1-3xmCherry-hphNT1, ura3::pKB80 [PGPD1-GAL4(848)-ER-URA3::hphNT1], natNT2-PGAL1-NDT80, NDC80-EGFP-TRP1 |
| Y1600 | MAT $\alpha$ , leu2, lys2-2, tyr1-2, met13-c, ura3-1, trp1- $\Delta$ 63, cyh2-1, his3- $\Delta$ 1, natNT2-PGAL1-NDT80, MTW1-3xmCherry-hphNT1, NDC80-EGFP-TRP1                                        |
| X1460 | MAT $\alpha$ , ura3-13, trp1- $\Delta$ 63, his3- $\Delta$ 1, leu2, met13-d, tyr1-1, lys2-1, can1-R, NDC80-EGFP-KanMx4, MTW1-13xMYC-TRP1, ndt80::LEU2                                                 |
| Y1425 | MAT $\alpha$ , leu2, lys2-2, met13-c, tyr1-2, ura3-1, trp1- $\Delta$ 63, cyh2-1, his3- $\Delta$ 1, NDC80-EGFP-TRP1, SPC42-[MDE1145: URA3 SPC42-DSRed], MTW1-13xMYC-HIS3MX, ndt80::LEU2               |
| X1475 | MAT $\alpha$ , ura3-13, trp1- $\Delta$ 63, his3-1, leu2, met13-d, tyr1-1, lys2-1, can1 (R), KanMX-PGAL1-NDT80, SPC42-[OPL29: URA3 SPC42-CFP], MTW1-3xmCherry-hphNT1, MIF2-yeGFP-TRP1                 |
| Y1439 | MAT $\alpha$ , leu2, lys2-2, met13-c, tyr1-2, trp1- $\Delta$ 63, cyh2-1, his3- $\Delta$ 1, KanMX-PGAL1-NDT80, ura3::pKB80 [PGPD1-GAL4(848)-ER-URA3::HIS], MTW1-3xmCherry-hphNT1, MIF2-yeGFP-TRP1     |
| X1476 | MAT $\alpha$ , ura3-13, trp1- $\Delta$ 63, his3-1, leu2, met13-d, tyr1-1, lys2-1, can1 (R), KanMX-PGAL1-NDT80, SPC42-[OPL29: URA3 SPC42-CFP], MTW1-3xmCherry-hphNT1, MIF2-yeGFP-TRP1                 |
| Y1440 | MAT $\alpha$ , leu2, lys2-2, met13-c, tyr1-2, trp1- $\Delta$ 63, cyh2-1, his3- $\Delta$ 1, KanMX-PGAL1-NDT80, ura3::pKB80 [PGPD1-GAL4(848)-ER-URA3::HIS], MTW1-3xmCherry-hphNT1, MIF2-yeGFP-TRP1     |
| X1477 | MAT $\alpha$ , ura3-13, trp1- $\Delta$ 63, his3-1, leu2, met13-d, tyr1-1, lys2-1, can1 (R), KanMX-PGAL1-NDT80, SPC42-[OPL29: URA3 SPC42-CFP], MTW1-3xmCherry-hphNT1, NDC10-yeGFP-TRP1                |
| Y1441 | MAT $\alpha$ , leu2, lys2-2, met13-c, tyr1-2, trp1- $\Delta$ 63, cyh2-1, his3- $\Delta$ 1, KanMX-PGAL1-NDT80, ura3::pKB80 [PGPD1-GAL4(848)-ER-URA3::HIS], MTW1-3xmCherry-hphNT1, NDC10-yeGFP-TRP1    |

|       |                                                                                                                                                                                                   |
|-------|---------------------------------------------------------------------------------------------------------------------------------------------------------------------------------------------------|
| X1478 | MAT $\alpha$ , ura3-13, trp1-63, his3-1, leu2, met13-d, tyr1-1, lys2-1, can1 (R), KanMX-PGAL1-NDT80, SPC42-[OPL29: URA3 SPC42-CFP], MTW1-3xmCherry-hphNT1, NDC10-yeGFP-TRP1                       |
| Y1442 | MATa, leu2, lys2-2, met13-c, tyr1-2, trp1- $\Delta$ 63, cyh2-1, his3- $\Delta$ 1, KanMX-PGAL1-NDT80, ura3::pKB80 [PGPD1-GAL4(848)-ER-URA3::HIS], MTW1-3xmCherry-hphNT1, NDC10-yeGFP-TRP1          |
| X2001 | MATa, ura3::pKB80 [PGPD1-GAL4(848)-ER-ura3::hphNT1], trp1-63, his3-1, leu2, met13-d, tyr1-1, lys2-1, can1 (R), CNN1-yeGFP-TRP1, natNT2-PGAL1-NDT80, MTW1-3xmCherry-hphNT1                         |
| Y1789 | MAT $\alpha$ , leu2, lys2-2, met13-c, tyr1-2, trp1- $\Delta$ 63, cyh2-1, his3- $\Delta$ 1, ura3-1, CNN1-yeGFP-TRP1, natNT2-PGAL1-NDT80, MTW1-3xmCherry-hphNT1                                     |
| X2002 | MAT $\alpha$ , ura3::pKB80 [PGPD1-GAL4(848)-ER-ura3::hphNT1], trp1-63, his3-1, leu2, met13-d, tyr1-1, lys2-1, can1 (R), CNN1-yeGFP-TRP1, natNT2-PGAL1-NDT80, MTW1-3xmCherry-hphNT1                |
| Y1790 | MATa, leu2, lys2-2, met13-c, tyr1-2, trp1- $\Delta$ 63, cyh2-1, his3- $\Delta$ 1, ura3-1, CNN1-yeGFP-TRP1, natNT2-PGAL1-NDT80, MTW1-3xmCherry-hphNT1                                              |
| X1447 | MATa, ura3-13, trp1- $\Delta$ 63, leu2-?, tyr1-1, lys2-1, met13-d, can1-R, his3- $\Delta$ 1, ndt80::LEU2, Dsn1-3XFLAG-KanMX                                                                       |
| Y1420 | MAT $\alpha$ , ura3-1, trp1- $\Delta$ 63, leu2-?, tyr1-2, lys2-2, met13-c, cyh2-1, ndt80::LEU2, his3- $\Delta$ 1, Dsn1-3xFLAG-KanMX                                                               |
| X1469 | MATa, ura3-13, trp1-63, his3-1, leu2, met13-d, tyr1-1, lys2-1, can1 (R), KanMX-PGAL1-NDT80, SPC42-[OPL29: URA3 SPC42-CFP], MTW1-3xmCherry-hphNT1, CTF19-yeGFP-TRP1                                |
| Y1433 | MAT $\alpha$ , leu2, lys2-2, met13-c, tyr1-2, trp1- $\Delta$ 63, cyh2-1, his3- $\Delta$ 1, KanMX-PGAL1-NDT80, ura3::pKB80 [PGPD1-GAL4(848)-ER-URA3::HIS], MTW1-3xmCherry-hphNT1, CTF19-yeGFP-TRP1 |
| X1470 | MAT $\alpha$ , ura3-13, trp1-63, his3-1, leu2, met13-d, tyr1-1, lys2-1, can1 (R), KanMX-PGAL1-NDT80, SPC42-[OPL29: URA3 SPC42-CFP], MTW1-3xmCherry-hphNT1, CTF19-yeGFP-TRP1                       |
| Y1434 | MATa, leu2, lys2-2, met13-c, tyr1-2, trp1- $\Delta$ 63, cyh2-1, his3- $\Delta$ 1, KanMX-PGAL1-NDT80, ura3::pKB80 [PGPD1-GAL4(848)-ER-URA3::HIS], MTW1-3xmCherry-hphNT1, CTF19-yeGFP-TRP1          |
| X1473 | MATa, ura3-13, trp1-63, his3-1, leu2, met13-d, tyr1-1, lys2-1, can1 (R), KanMX-PGAL1-NDT80, SPC42-[OPL29: URA3 SPC42-CFP], MTW1-3xmCherry-hphNT1, CTF3-yeGFP-TRP1                                 |
| Y1437 | MAT $\alpha$ , leu2, lys2-2, met13-c, tyr1-2, trp1- $\Delta$ 63, cyh2-1, his3- $\Delta$ 1, KanMX-PGAL1-NDT80, ura3::pKB80 [PGPD1-GAL4(848)-ER-URA3::HIS], MTW1-3xmCherry-hphNT1, CTF3-yeGFP-TRP1  |
| X1474 | MAT $\alpha$ , ura3-13, trp1-63, his3-1, leu2, met13-d, tyr1-1, lys2-1, can1 (R), KanMX-PGAL1-NDT80, SPC42-[OPL29: URA3 SPC42-CFP], MTW1-3xmCherry-hphNT1, CTF3-yeGFP-TRP1                        |
| Y1438 | MATa, leu2, lys2-2, met13-c, tyr1-2, trp1- $\Delta$ 63, cyh2-1, his3- $\Delta$ 1, KanMX-PGAL1-NDT80, ura3::pKB80 [PGPD1-GAL4(848)-ER-URA3::HIS], MTW1-3xmCherry-hphNT1, CTF3-yeGFP-TRP1           |



|       |                                                                                                                                                                                                      |
|-------|------------------------------------------------------------------------------------------------------------------------------------------------------------------------------------------------------|
| X1365 | MAT $\alpha$ , ura3-13, trp1-63, his3-1, leu2, met13-d, tyr1-1, lys2-1, can1 (R), KanMX-PGAL1-NDT80, SPC42-[OPL29: URA3 SPC42-CFP], MTW1-3xmCherry-hphNT1, DSN1-yeGFP-TRP1                           |
| Y1339 | MAT $\alpha$ , leu2, lys2-2, met13-c, tyr1-2, trp1- $\Delta$ 63, cyh2-1, his3- $\Delta$ 1, KanMX-PGAL1-NDT80, URA3::pKB80 [PGPD1-GAL4(848)-ER-URA3::HIS], MTW1-3xmCherry-hphNT1, DSN1-yeGFP-TRP1     |
| X1366 | MAT $\alpha$ , ura3-13, trp1-63, his3-1, leu2, met13-d, tyr1-1, lys2-1, can1 (R), KanMX-PGAL1-NDT80, SPC42-[OPL29: URA3 SPC42-CFP], MTW1-3xmCherry-hphNT1, DSN1-yeGFP-TRP1                           |
| Y1340 | MAT $\alpha$ , leu2, lys2-2, met13-c, tyr1-2, trp1- $\Delta$ 63, cyh2-1, his3- $\Delta$ 1, KanMX-PGAL1-NDT80, URA3::pKB80 [PGPD1-GAL4(848)-ER-URA3::HIS], MTW1-3xmCherry-hphNT1, DSN1-yeGFP-TRP1     |
| X1957 | MAT $\alpha$ , trp1- $\Delta$ 63, his3- $\Delta$ 1, leu2, met13-d, tyr1-1, lys2-1, can1-R, ura3::pKB80 [PGPD1-GAL4(848)-ER-ura3::hphNT1], natNT2-PGAL1-NDT80, MTW1-3xmCherry-hphNT1, NSL1-yeGFP-TRP1 |
| Y1763 | MAT $\alpha$ , leu2, lys2-2, tyr1-2, met13-c, ura3-1, trp1- $\Delta$ 63, cyh2-1, his3- $\Delta$ 1, MTW1-3xmCherry-hphNT1, NSL1-yeGFP-TRP1, natNT2-PGAL1-NDT80                                        |
| X1958 | MAT $\alpha$ , trp1- $\Delta$ 63, his3- $\Delta$ 1, leu2, met13-d, tyr1-1, lys2-1, can1-R, ura3::pKB80 [PGPD1-GAL4(848)-ER-ura3::hphNT1], natNT2-PGAL1-NDT80, MTW1-3xmCherry-hphNT1, NSL1-yeGFP-TRP1 |
| Y1764 | MAT $\alpha$ , leu2, lys2-2, tyr1-2, met13-c, ura3-1, trp1- $\Delta$ 63, cyh2-1, his3- $\Delta$ 1, MTW1-3xmCherry-hphNT1, NSL1-yeGFP-TRP1, natNT2-PGAL1-NDT80                                        |
| X1363 | MAT $\alpha$ , ura3-13, trp1-63, his3-1, leu2, met13-d, tyr1-1, lys2-1, can1 (R), KanMX-PGAL1-NDT80, SPC42-[OPL29: URA3 SPC42-CFP], MTW1-3xmCherry-hphNT1, SPC105-yeGFP-TRP1                         |
| Y1337 | MAT $\alpha$ , leu2, lys2-2, met13-c, tyr1-2, trp1- $\Delta$ 63, cyh2-1, his3- $\Delta$ 1, KanMX-PGAL1-NDT80, URA3::pKB80 [PGPD1-GAL4(848)-ER-URA3::HIS], MTW1-3xmCherry-hphNT1, SPC105-yeGFP-TRP1   |
| X1364 | MAT $\alpha$ , ura3-13, trp1-63, his3-1, leu2, met13-d, tyr1-1, lys2-1, can1 (R), KanMX-PGAL1-NDT80, SPC42-[OPL29: URA3 SPC42-CFP], MTW1-3xmCherry-hphNT1, SPC105-yeGFP-TRP1                         |
| Y1338 | MAT $\alpha$ , leu2, lys2-2, met13-c, tyr1-2, trp1- $\Delta$ 63, cyh2-1, his3- $\Delta$ 1, KanMX-PGAL1-NDT80, URA3::pKB80 [PGPD1-GAL4(848)-ER-URA3::HIS], MTW1-3xmCherry-hphNT1, SPC105-yeGFP-TRP1   |
| X1367 | MAT $\alpha$ , ura3-13, trp1-63, his3-1, leu2, met13-d, tyr1-1, lys2-1, can1 (R), KanMX-PGAL1-NDT80, SPC42-[OPL29: URA3 SPC42-CFP], MTW1-3xmCherry-hphNT1, SPC24-yeGFP-TRP1                          |
| Y1341 | MAT $\alpha$ , leu2, lys2-2, met13-c, tyr1-2, trp1- $\Delta$ 63, cyh2-1, his3- $\Delta$ 1, KanMX-PGAL1-NDT80, URA3::pKB80 [PGPD1-GAL4(848)-ER-URA3::HIS], MTW1-3xmCherry-hphNT1, SPC24-yeGFP-TRP1    |
| X1368 | MAT $\alpha$ , ura3-13, trp1-63, his3-1, leu2, met13-d, tyr1-1, lys2-1, can1 (R), KanMX-PGAL1-NDT80, SPC42-[OPL29: URA3 SPC42-CFP], MTW1-3xmCherry-hphNT1, SPC24-yeGFP-TRP1                          |
| Y1342 | MAT $\alpha$ , leu2, lys2-2, met13-c, tyr1-2, trp1- $\Delta$ 63, cyh2-1, his3- $\Delta$ 1, KanMX-PGAL1-NDT80, URA3::pKB80 [PGPD1-GAL4(848)-ER-URA3::HIS], MTW1-3xmCherry-hphNT1, SPC24-yeGFP-TRP1    |

|       |                                                                                                                                                                                                       |
|-------|-------------------------------------------------------------------------------------------------------------------------------------------------------------------------------------------------------|
| X1959 | MAT $\alpha$ , trp1- $\Delta$ 63, his3- $\Delta$ 1, leu2, met13-d, tyr1-1, lys2-1, can1-R, ura3::pKB80 [PGPD1-GAL4(848)-ER-ura3::hphNT1], natNT2-PGAL1-NDT80, MTW1-3xmCherry-hphNT1, NUF2-yeGFP-TRP1  |
| Y1765 | MAT $\alpha$ , leu2, lys2-2, tyr1-2, met13-c, ura3-1, trp1- $\Delta$ 63, cyh2-1, his3- $\Delta$ 1, MTW1-3xmCherry-hphNT1, NUF2-yeGFP-TRP1, natNT2-PGAL1-NDT80                                         |
| X1960 | MAT $\alpha$ , trp1- $\Delta$ 63, his3- $\Delta$ 1, leu2, met13-d, tyr1-1, lys2-1, can1-R, ura3::pKB80 [PGPD1-GAL4(848)-ER-ura3::hphNT1], natNT2-PGAL1-NDT80, MTW1-3xmCherry-hphNT1, NUF2-yeGFP-TRP1  |
| Y1766 | MAT $\alpha$ , leu2, lys2-2, tyr1-2, met13-c, ura3-1, trp1- $\Delta$ 63, cyh2-1, his3- $\Delta$ 1, MTW1-3xmCherry-hphNT1, NUF2-yeGFP-TRP1, natNT2-PGAL1-NDT80                                         |
| X1335 | MAT $\alpha$ , met13-d, trp1- $\Delta$ 63, tyr1-1, ura3-13, his3- $\Delta$ 1, can1-R, leu2, lys2-1, KanMX-PGAL1-NDT80, NDC80-EGFP-TRP1, SPC42-[OPL29: URA3 SPC42-CFP], MTW1-3xmCherry-hphNT1          |
| Y1275 | MAT $\alpha$ , leu2, lys2-2, met13-c, tyr1-2, trp1- $\Delta$ 63, cyh2-1, his3- $\Delta$ 1, NDC80-EGFP-TRP1, KanMX-PGAL1-NDT80, URA3::pKB80 [PGPD1-GAL4(848)-ER-URA3::HIS], MTW1-3xmCherry-hphNT1      |
| X1336 | MAT $\alpha$ , met13-d, trp1- $\Delta$ 63, tyr1-1, ura3-13, his3- $\Delta$ 1, can1-R, leu2, lys2-1, KanMX-PGAL1-NDT80, NDC80-EGFP-TRP1, SPC42-[OPL29: URA3 SPC42-CFP], MTW1-3xmCherry-hphNT1          |
| Y1276 | MAT $\alpha$ , leu2, lys2-2, met13-c, tyr1-2, trp1- $\Delta$ 63, cyh2-1, his3- $\Delta$ 1, NDC80-EGFP-TRP1, KanMX-PGAL1-NDT80, URA3::pKB80 [PGPD1-GAL4(848)-ER-URA3::HIS], MTW1-3xmCherry-hphNT1      |
| X1355 | MAT $\alpha$ , ura3-13, trp1-63, his3-1, leu2, met13-d, tyr1-1, lys2-1, can1 (R), KanMX-PGAL1-NDT80, SPC42-[OPL29: URA3 SPC42-CFP], MTW1-3xmCherry-hphNT1, DAM1-yeGFP-TRP1                            |
| Y1335 | MAT $\alpha$ , leu2, lys2-2, met13-c, tyr1-2, trp1- $\Delta$ 63, cyh2-1, his3- $\Delta$ 1, KanMX-PGAL1-NDT80, URA3::pKB80 [PGPD1-GAL4(848)-ER-URA3::HIS], MTW1-3xmCherry-hphNT1, DAM1-yeGFP-TRP1      |
| X1356 | MAT $\alpha$ , ura3-13, trp1-63, his3-1, leu2, met13-d, tyr1-1, lys2-1, can1 (R), KanMX-PGAL1-NDT80, SPC42-[OPL29: URA3 SPC42-CFP], MTW1-3xmCherry-hphNT1, DAM1-yeGFP-TRP1                            |
| Y1336 | MAT $\alpha$ , leu2, lys2-2, met13-c, tyr1-2, trp1- $\Delta$ 63, cyh2-1, his3- $\Delta$ 1, KanMX-PGAL1-NDT80, URA3::pKB80 [PGPD1-GAL4(848)-ER-URA3::HIS], MTW1-3xmCherry-hphNT1, DAM1-yeGFP-TRP1      |
| X1955 | MAT $\alpha$ , trp1- $\Delta$ 63, his3- $\Delta$ 1, leu2, met13-d, tyr1-1, lys2-1, can1-R, MTW1-3xmCherry-hphNT1, ura3::pKB80 [PGPD1-GAL4(848)-ER-ura3::hphNT1], SPC24-yeGFP-TRP1, natNT2-PGAL1-NDT80 |
| Y1757 | MAT $\alpha$ , leu2, lys2-2, tyr1-2, met13-c, ura3-1, trp1- $\Delta$ 63, cyh2-1, his3- $\Delta$ 1, MTW1-3xmCherry-hphNT1, natNT2-PGAL1-NDT80, SPC24-yeGFP-TRP1                                        |
| X1956 | MAT $\alpha$ , trp1- $\Delta$ 63, his3- $\Delta$ 1, leu2, met13-d, tyr1-1, lys2-1, can1-R, MTW1-3xmCherry-hphNT1, ura3::pKB80 [PGPD1-GAL4(848)-ER-ura3::hphNT1], SPC24-yeGFP-TRP1, natNT2-PGAL1-NDT80 |
| Y1758 | MAT $\alpha$ , leu2, lys2-2, tyr1-2, met13-c, ura3-1, trp1- $\Delta$ 63, cyh2-1, his3- $\Delta$ 1, MTW1-3xmCherry-hphNT1, natNT2-PGAL1-NDT80, SPC24-yeGFP-TRP1                                        |

|       |                                                                                                                                                                                                                                                |
|-------|------------------------------------------------------------------------------------------------------------------------------------------------------------------------------------------------------------------------------------------------|
| X2080 | MAT $\alpha$ , ura3-13, trp1- $\Delta$ 63, leu2-?, tyr1-1, lys2-1, met13-d, can1-R, his3- $\Delta$ 1, MTW1-GFP-URA3, cdc28-as1                                                                                                                 |
| X2081 | MAT $\alpha$ , ura3-13, trp1- $\Delta$ 63, leu2-?, tyr1-1, lys2-1, met13-d, can1-R, his3- $\Delta$ 1, MTW1-GFP-URA3, cdc28-as1                                                                                                                 |
| Y1859 | MAT $\alpha$ , leu2, lys2-2, tyr1-2, met13-c, ura3-1, trp1- $\Delta$ 63, cyh2-1, his3- $\Delta$ 1, MTW1-GFP-URA3, SPC42-[MDE1145: URA3 SPC42-DSRed], cdc28-as1                                                                                 |
| X1531 | MAT $\alpha$ , ura3::pKB80 [PGPD1-GAL4(848)-ER-URA3::hphNT1], trp1-63, his3-1, leu2, met13-d, tyr1-1, lys2-1, can1 (R), NDC80-EGFP-TRP1, natNT2-PGAL1-NDT80, cdc28-as1                                                                         |
| Y1492 | MAT $\alpha$ , leu2, lys2-2, tyr1-2, met13-c, ura3-1, trp1- $\Delta$ 63, cyh2-1, his3- $\Delta$ 1, natNT2-PGAL1-NDT80, NDC80-EGFP-TRP1, cdc28-as1, SPC42-[MDE1145: URA3 SPC42-DSRed]                                                           |
| X1706 | MAT $\alpha$ , ura3::pKB80 [PGPD1-GAL4(848)-ER-URA3::hphNT1], trp1-63, his3-1, leu2, met13-d, tyr1-1, lys2-1, can1 (R), SPC42-[MDE1145: URA3::HIS SPC42-DSRed], cdc28-as1, NDC80-EGFP-TRP1, natNT2-PGAL1-NDT80                                 |
| Y1494 | MAT $\alpha$ , leu2, lys2-2, tyr1-2, met13-c, ura3-1, trp1- $\Delta$ 63, cyh2-1, his3- $\Delta$ 1, natNT2-PGAL1-NDT80, NDC80-EGFP-TRP1, cdc28-as1                                                                                              |
| X1519 | MAT $\alpha$ , ura3::pKB80 [PGPD1-GAL4(848)-ER-URA3::hphNT1], trp1-63, his3-1, leu2, met13-d, tyr1-1, lys2-1, can1 (R), SPC42-[MDE1145: URA3::HIS SPC42-DSRed], NDC80-EGFP-TRP1, natNT2-PGAL1-NDT80                                            |
| Y1471 | MAT $\alpha$ , leu2, lys2-2, tyr1-2, met13-c, ura3-1, trp1- $\Delta$ 63, cyh2-1, his3- $\Delta$ 1, natNT2-PGAL1-NDT80, NDC80-EGFP-TRP1                                                                                                         |
| X1520 | MAT $\alpha$ , ura3::pKB80 [PGPD1-GAL4(848)-ER-URA3::hphNT1], trp1-63, his3-1, leu2, met13-d, tyr1-1, lys2-1, can1 (R), SPC42-[MDE1145: URA3::HIS SPC42-DSRed], NDC80-EGFP-TRP1, natNT2-PGAL1-NDT80                                            |
| Y1472 | MAT $\alpha$ , leu2, lys2-2, tyr1-2, met13-c, ura3-1, trp1- $\Delta$ 63, cyh2-1, his3- $\Delta$ 1, natNT2-PGAL1-NDT80, NDC80-EGFP-TRP1                                                                                                         |
| X1589 | MAT $\alpha$ , ura3::pKB80 [PGPD1-GAL4(848)-ER-URA3::hphNT1], trp1- $\Delta$ 63, leu2-?, tyr1-1, lys2-1, met13-d, can1-R, his3- $\Delta$ 1, NDC80-EGFP-TRP1, SPC42-[MDE1145: URA3::HIS SPC42-DSRed], natNT2-PGAL1-NDT80, PCLB2-3HA-IPL1 KanMX6 |
| Y1511 | MAT $\alpha$ , leu2, lys2-2, tyr1-2, met13-c, ura3-1, trp1- $\Delta$ 63, cyh2-1, his3- $\Delta$ 1, natNT2-PGAL1-NDT80, PCLB2-3HA-IPL1 KanMX6, NDC80-EGFP-TRP1                                                                                  |
| X1590 | MAT $\alpha$ , ura3::pKB80 [PGPD1-GAL4(848)-ER-URA3::hphNT1], trp1- $\Delta$ 63, leu2-?, tyr1-1, lys2-1, met13-d, can1-R, his3- $\Delta$ 1, NDC80-EGFP-TRP1, natNT2-PGAL1-NDT80, PCLB2-3HA-IPL1 KanMX6                                         |
| Y1514 | MAT $\alpha$ , leu2, lys2-2, tyr1-2, met13-c, ura3-1, trp1- $\Delta$ 63, cyh2-1, his3- $\Delta$ 1, natNT2-PGAL1-NDT80, PCLB2-3HA-IPL1 KanMX6, NDC80-EGFP-TRP1, SPC42-[MDE1145: URA3 SPC42-DSRed]                                               |
| X1611 | MAT $\alpha$ , trp1- $\Delta$ 63, his3- $\Delta$ 1, leu2, met13-d, tyr1-1, lys2-1, can1-R, ura3::pKB80 [PGPD1-GAL4(848)-ER-URA3::hphNT1], natNT2-PGAL1-NDT80, SPC42-[MDE1145: URA3::HIS SPC42-DSRed], SPC24-yeGFP-TRP1                         |
| Y1529 | MAT $\alpha$ , leu2, lys2-2, tyr1-2, met13-c, ura3-1, trp1- $\Delta$ 63, cyh2-1, his3- $\Delta$ 1, natNT2-PGAL1-NDT80, SPC24-yeGFP-TRP1                                                                                                        |

|       |                                                                                                                                                                                                                                               |
|-------|-----------------------------------------------------------------------------------------------------------------------------------------------------------------------------------------------------------------------------------------------|
| X1612 | MAT $\alpha$ , trp1- $\Delta$ 63, his3- $\Delta$ 1, leu2, met13-d, tyr1-1, lys2-1, can1-R, ura3::pKB80 [PGPD1-GAL4(848)-ER-URA3::hphNT1], natNT2-PGAL1-NDT80, SPC42-[MDE1145: URA3::HIS SPC42-DSRed], SPC24-yeGFP-TRP1                        |
| Y1530 | MATa, leu2, lys2-2, tyr1-2, met13-c, ura3-1, trp1- $\Delta$ 63, cyh2-1, his3- $\Delta$ 1, natNT2-PGAL1-NDT80, SPC24-yeGFP-TRP1                                                                                                                |
| X1609 | MATa, trp1- $\Delta$ 63, his3- $\Delta$ 1, leu2, met13-d, tyr1-1, lys2-1, can1-R, ura3::pKB80 [PGPD1-GAL4(848)-ER-URA3::hphNT1], natNT2-PGAL1-NDT80, SPC42-[MDE1145: URA3::HIS SPC42-DSRed], SPC24-yeGFP-TRP1, PCLB2-3HA-IPL1 KanMX6          |
| Y1527 | MAT $\alpha$ , leu2, lys2-2, tyr1-2, met13-c, ura3-1, trp1- $\Delta$ 63, cyh2-1, his3- $\Delta$ 1, natNT2-PGAL1-NDT80, PCLB2-3HA-IPL1 KanMX6, SPC24-yeGFP-TRP1                                                                                |
| X1610 | MAT $\alpha$ , trp1- $\Delta$ 63, his3- $\Delta$ 1, leu2, met13-d, tyr1-1, lys2-1, can1-R, ura3::pKB80 [PGPD1-GAL4(848)-ER-URA3::hphNT1], natNT2-PGAL1-NDT80, SPC42-[MDE1145: URA3::HIS SPC42-DSRed], SPC24-yeGFP-TRP1, PCLB2-3HA-IPL1 KanMX6 |
| Y1528 | MATa, leu2, lys2-2, tyr1-2, met13-c, ura3-1, trp1- $\Delta$ 63, cyh2-1, his3- $\Delta$ 1, natNT2-PGAL1-NDT80, PCLB2-3HA-IPL1 KanMX6, SPC24-yeGFP-TRP1                                                                                         |
| X1603 | MATa, trp1- $\Delta$ 63, his3- $\Delta$ 1, leu2, met13-d, tyr1-1, lys2-1, can1-R, ura3::pKB80 [PGPD1-GAL4(848)-ER-URA3::hphNT1], natNT2-PGAL1-NDT80, SPC42-[MDE1145: URA3::HIS SPC42-DSRed], DAM1-yeGFP-TRP1                                  |
| Y1521 | MAT $\alpha$ , leu2, lys2-2, tyr1-2, met13-c, ura3-1, trp1- $\Delta$ 63, cyh2-1, his3- $\Delta$ 1, natNT2-PGAL1-NDT80, DAM1-yeGFP-TRP1                                                                                                        |
| X1604 | MAT $\alpha$ , trp1- $\Delta$ 63, his3- $\Delta$ 1, leu2, met13-d, tyr1-1, lys2-1, can1-R, ura3::pKB80 [PGPD1-GAL4(848)-ER-URA3::hphNT1], natNT2-PGAL1-NDT80, SPC42-[MDE1145: URA3::HIS SPC42-DSRed], DAM1-yeGFP-TRP1                         |
| Y1522 | MATa, leu2, lys2-2, tyr1-2, met13-c, ura3-1, trp1- $\Delta$ 63, cyh2-1, his3- $\Delta$ 1, natNT2-PGAL1-NDT80, DAM1-yeGFP-TRP1                                                                                                                 |
| X1601 | MATa, trp1- $\Delta$ 63, his3- $\Delta$ 1, leu2, met13-d, tyr1-1, lys2-1, can1-R, ura3::pKB80 [PGPD1-GAL4(848)-ER-URA3::hphNT1], natNT2-PGAL1-NDT80, PCLB2-3HA-IPL1 KanMX6, SPC42-[MDE1145: URA3::HIS SPC42-DSRed], DAM1-yeGFP-TRP1           |
| Y1519 | MAT $\alpha$ , leu2, lys2-2, tyr1-2, met13-c, ura3-1, trp1- $\Delta$ 63, cyh2-1, his3- $\Delta$ 1, natNT2-PGAL1-NDT80, PCLB2-3HA-IPL1 KanMX6, DAM1-yeGFP-TRP1                                                                                 |
| X1602 | MAT $\alpha$ , trp1- $\Delta$ 63, his3- $\Delta$ 1, leu2, met13-d, tyr1-1, lys2-1, can1-R, ura3::pKB80 [PGPD1-GAL4(848)-ER-URA3::hphNT1], natNT2-PGAL1-NDT80, PCLB2-3HA-IPL1 KanMX6, SPC42-[MDE1145: URA3::HIS SPC42-DSRed], DAM1-yeGFP-TRP1  |
| Y1520 | MATa, leu2, lys2-2, tyr1-2, met13-c, ura3-1, trp1- $\Delta$ 63, cyh2-1, his3- $\Delta$ 1, natNT2-PGAL1-NDT80, PCLB2-3HA-IPL1 KanMX6, DAM1-yeGFP-TRP1                                                                                          |
| X2120 | MAT $\alpha$ , ura3-13, trp1- $\Delta$ 63, his3- $\Delta$ 1, leu2, met13-d, tyr1-1, lys2-1, can1-R, NDC80-EGFP-KanMx4, MTW1-13xMYC-TRP1, ndt80::LEU2, PCLB2-3HA-IPL1 KanMX6                                                                   |
| Y1426 | MATa, leu2, lys2-2, met13-c, tyr1-2, ura3-1, trp1- $\Delta$ 63, cyh2-1, his3- $\Delta$ 1, NDC80-EGFP-TRP1, PCLB2-3HA-IPL1 KanMX6, SPC42-[MDE1145: URA3 SPC42-DSRed], MTW1-13xMYC-HIS3MX, ndt80::LEU2                                          |

|       |                                                                                                                                                                                                                                                       |
|-------|-------------------------------------------------------------------------------------------------------------------------------------------------------------------------------------------------------------------------------------------------------|
| X1446 | MAT <sub>a</sub> , ura3-13, trp1-Δ63, his3-Δ1, leu2-?, met13-d, tyr1-1, lys2-1, can1-R, Dsn1-3FLAG-kanMX                                                                                                                                              |
| Y1419 | MAT <sub>α</sub> , leu2-?, lys2-2, met13-c, tyr1-2, ura3-1, trp1-Δ63, cyh2-1, his3-Δ1, Dsn1-3xFLAG-KanMX                                                                                                                                              |
| X1571 | MAT <sub>a</sub> , ura3-13, trp1-Δ63, his3-Δ1, leu2-?, met13-d, tyr1-1, lys2-1, can1-R, Dsn1-3FLAG-kanMX, PCLB2-3HA-IPL1 KanMX6                                                                                                                       |
| Y1500 | MAT <sub>α</sub> , leu2-?, lys2-2, met13-c, tyr1-2, ura3-1, trp1-Δ63, cyh2-1, his3-Δ1, Dsn1-3xFLAG-KanMX, PCLB2-3HA-IPL1 KanMX6                                                                                                                       |
| X1675 | MAT <sub>a</sub> , trp1-Δ63, his3-Δ1, leu2, met13-d, tyr1-1, lys2-1, can1-R, MTW1-3xmCherry-hphNT1, ura3::pKB80 [PGPD1-GAL4(848)-ER-URA3::hphNT1], MAM1-yeGFP-TRP1, natNT2-PGAL1-NDT80                                                                |
| Y1583 | MAT <sub>α</sub> , leu2, lys2-2, tyr1-2, met13-c, ura3-1, trp1-Δ63, cyh2-1, his3-Δ1, natNT2-PGAL1-NDT80, MTW1-3xmCherry-hphNT1, MAM1-yeGFP-TRP1                                                                                                       |
| X1691 | MAT <sub>α</sub> , trp1-Δ63, his3-Δ1, leu2, met13-d, tyr1-1, lys2-1, can1-R, MTW1-3xmCherry-hphNT1, ura3::pKB80 [PGPD1-GAL4(848)-ER-URA3::hphNT1], MAM1-yeGFP-TRP1, SPC42-[MDE1145: URA3::HIS SPC42-DSRed], natNT2-PGAL1-NDT80, PCLB2-3HA-IPL1 KanMX6 |
| Y1586 | MAT <sub>a</sub> , leu2, lys2-2, tyr1-2, met13-c, ura3-1, trp1-Δ63, cyh2-1, his3-Δ1, natNT2-PGAL1-NDT80, PCLB2-3HA-IPL1 KanMX6, MAM1-yeGFP-TRP1, MTW1-3xmCherry-hphNT1                                                                                |
| X1692 | MAT <sub>α</sub> , trp1-Δ63, his3-Δ1, leu2, met13-d, tyr1-1, lys2-1, can1-R, MTW1-3xmCherry-hphNT1, ura3::pKB80 [PGPD1-GAL4(848)-ER-URA3::hphNT1], MAM1-yeGFP-TRP1, SPC42-[MDE1145: URA3::HIS SPC42-DSRed], natNT2-PGAL1-NDT80, PCLB2-3HA-IPL1 KanMX6 |
| Y1582 | MAT <sub>a</sub> , leu2, lys2-2, tyr1-2, met13-c, ura3-1, trp1-Δ63, cyh2-1, his3-Δ1, natNT2-PGAL1-NDT80, MTW1-3xmCherry-hphNT1, ipl1ΔKAN:ipl1-as5-MYC:HIS3:LEU2, MAM1-yeGFP-TRP1                                                                      |
| X2047 | MAT <sub>a</sub> , ura3-13, trp1-63, his3-1, leu2, met13-d, tyr1-1, lys2-1, can1 (R), DAM1-yeGFP-TRP1                                                                                                                                                 |
| Y1477 | MAT <sub>α</sub> , leu2, lys2-2, met13-c, tyr1-2, trp1-Δ63, cyh2-1, his3-Δ1, ura3-1, DAM1-yeGFP-TRP1                                                                                                                                                  |
| X2048 | MAT <sub>α</sub> , ura3-13, trp1-63, his3-1, leu2, met13-d, tyr1-1, lys2-1, can1 (R), DAM1-yeGFP-TRP1                                                                                                                                                 |
| Y1478 | MAT <sub>a</sub> , leu2, lys2-2, met13-c, tyr1-2, trp1-Δ63, cyh2-1, his3-Δ1, ura3-1, DAM1-yeGFP-TRP1                                                                                                                                                  |
| X1294 | MAT <sub>α</sub> , ura3-13, trp1-Δ63, his3-Δ1, leu2, met13-d, tyr1-1, lys2-1, can1-R, NDC80-EGFP-TRP1                                                                                                                                                 |
| Y1192 | MAT <sub>a</sub> , leu2, lys2-2, met13-c, tyr1-2, ura3-1, trp1-Δ63, cyh2-1, his3-Δ1, NDC80-EGFP-TRP1                                                                                                                                                  |
| X1999 | MAT <sub>a</sub> , trp1-Δ63, his3-Δ1, leu2, met13-d, tyr1-1, lys2-1, can1-R, ura3-13, NUF2-yeGFP-TRP1                                                                                                                                                 |
| Y1787 | MAT <sub>α</sub> , leu2, lys2-2, tyr1-2, met13-c, ura3-1, trp1-Δ63, cyh2-1, his3-Δ1, NUF2-yeGFP-TRP1                                                                                                                                                  |
| X2000 | MAT <sub>α</sub> , trp1-Δ63, his3-Δ1, leu2, met13-d, tyr1-1, lys2-1, can1-R, ura3-13, NUF2-yeGFP-TRP1                                                                                                                                                 |
| Y1788 | MAT <sub>a</sub> , leu2, lys2-2, tyr1-2, met13-c, ura3-1, trp1-Δ63, cyh2-1, his3-Δ1, NUF2-yeGFP-TRP1                                                                                                                                                  |

|       |                                                                                                  |
|-------|--------------------------------------------------------------------------------------------------|
| X2005 | MATa, can1-R, leu2, lys2-1, met13-d, trp1-Δ63, tyr1-1, ura3-13, his3-Δ1, SPC24-yeGFP-TRP1        |
| Y1481 | MATα, leu2, lys2-2, met13-c, tyr1-2, trp1-Δ63, cyh2-1, his3-Δ1, ura3-1, SPC24-yeGFP-TRP1         |
| X2006 | MATα, can1-R, leu2, lys2-1, met13-d, trp1-Δ63, tyr1-1, ura3-13, his3-Δ1, SPC24-yeGFP-TRP1        |
| Y1482 | MATa, leu2, lys2-2, met13-c, tyr1-2, trp1-Δ63, cyh2-1, his3-Δ1, ura3-1, SPC24-yeGFP-TRP1         |
| X2007 | MATa, ura3-13, trp1-63, his3-1, leu2, met13-d, tyr1-1, lys2-1, can1 (R), SPC105-yeGFP-TRP1       |
| Y1479 | MATα, leu2, lys2-2, met13-c, tyr1-2, trp1-Δ63, cyh2-1, his3-Δ1, ura3-1, SPC105-yeGFP-TRP1        |
| X2008 | MATα, ura3-13, trp1-63, his3-1, leu2, met13-d, tyr1-1, lys2-1, can1 (R), SPC105-yeGFP-TRP1       |
| Y1480 | MATa, leu2, lys2-2, met13-c, tyr1-2, trp1-Δ63, cyh2-1, his3-Δ1, ura3-1, SPC105-yeGFP-TRP1        |
| X2046 | MATa, ura3-13, trp1-Δ63, his3-Δ1, leu2-?, met13-d, tyr1-1, lys2-1, can1-R, MAM1-yeGFP-TRP1       |
| Y1475 | MATα, leu2, lys2-2, met13-c, tyr1-2, trp1-Δ63, cyh2-1, his3-Δ1, ura3-1, MAM1-yeGFP-TRP1          |
| X1997 | MATa, trp1-Δ63, his3-Δ1, leu2, met13-d, tyr1-1, lys2-1, can1-R, ura3-13, NSL1-yeGFP-TRP1         |
| Y1785 | MATα, leu2, lys2-2, tyr1-2, met13-c, ura3-1, trp1-Δ63, cyh2-1, his3-Δ1, NSL1-yeGFP-TRP1          |
| X1998 | MATα, trp1-Δ63, his3-Δ1, leu2, met13-d, tyr1-1, lys2-1, can1-R, ura3-13, NSL1-yeGFP-TRP1         |
| Y1786 | MATa, leu2, lys2-2, tyr1-2, met13-c, ura3-1, trp1-Δ63, cyh2-1, his3-Δ1, NSL1-yeGFP-TRP1          |
| X2009 | MATa, ura3-13, trp1-63, his3-1, leu2, met13-d, tyr1-1, lys2-1, can1 (R), DSN1-yeGFP-TRP1         |
| Y1473 | MATα, leu2, lys2-2, met13-c, tyr1-2, trp1-Δ63, cyh2-1, his3-Δ1, ura3-1, DSN1-yeGFP-TRP1          |
| X1287 | MATa, ura3-13, trp1-Δ63, his3-Δ1, leu2-?, met13-d, tyr1-1, lys2-1, can1-R, MTW1-3xmCherry-hphNT1 |
| Y1279 | MATα, leu2-?, lys2-2, met13-c, tyr1-2, ura3-1, trp1-Δ63, cyh2-1, his3-Δ1, MTW1-3xmCherry-hphNT1  |
| X1288 | MATα, ura3-13, trp1-Δ63, his3-Δ1, leu2-?, met13-d, tyr1-1, lys2-1, can1-R, MTW1-3xmCherry-hphNT1 |
| Y1280 | MATa, leu2-?, lys2-2, met13-c, tyr1-2, ura3-1, trp1-Δ63, cyh2-1, his3-Δ1, MTW1-3xmCherry-hphNT1  |
| Y399  | MATα, leu2, lys2-2, tyr1-2, met13-c, ura3-1, trp1-Δ63, cyh2-1, his3-Δ1, MTW1-GFP-URA3            |
| Y400  | MATa, leu2, lys2-2, tyr1-2, met13-c, ura3-1, trp1-Δ63, cyh2-1, his3-Δ1, MTW1-GFP-URA3            |
| X2049 | MATa, ura3-13, trp1-63, his3-1, leu2, met13-d, tyr1-1, lys2-1, can1 (R), CTF19-yeGFP-TRP1        |
| Y1815 | MATα, leu2, lys2-2, tyr1-2, met13-c, ura3-1, trp1-Δ63, cyh2-1, his3-Δ1, CTF19-                   |

|       |                                                                                                                     |
|-------|---------------------------------------------------------------------------------------------------------------------|
|       | yeGFP-TRP1                                                                                                          |
| X2050 | MAT $\alpha$ , ura3-13, trp1-63, his3-1, leu2, met13-d, tyr1-1, lys2-1, can1 (R), CTF19-yeGFP-TRP1                  |
| Y1816 | MATa, leu2, lys2-2, tyr1-2, met13-c, ura3-1, trp1- $\Delta$ 63, cyh2-1, his3- $\Delta$ 1, CTF19-yeGFP-TRP1          |
| X2051 | MATa, ura3-13, trp1-63, his3-1, leu2, met13-d, tyr1-1, lys2-1, can1 (R), CHL4-yeGFP-TRP1                            |
| Y1817 | MAT $\alpha$ , leu2, lys2-2, tyr1-2, met13-c, ura3-1, trp1- $\Delta$ 63, cyh2-1, his3- $\Delta$ 1, CHL4-yeGFP-TRP1  |
| X2052 | MAT $\alpha$ , ura3-13, trp1-63, his3-1, leu2, met13-d, tyr1-1, lys2-1, can1 (R), CHL4-yeGFP-TRP1                   |
| Y1818 | MATa, leu2, lys2-2, tyr1-2, met13-c, ura3-1, trp1- $\Delta$ 63, cyh2-1, his3- $\Delta$ 1, CHL4-yeGFP-TRP1           |
| X2053 | MATa, ura3-13, trp1-63, his3-1, leu2, met13-d, tyr1-1, lys2-1, can1 (R), CTF3-yeGFP-TRP1                            |
| Y1819 | MAT $\alpha$ , leu2, lys2-2, tyr1-2, met13-c, ura3-1, trp1- $\Delta$ 63, cyh2-1, his3- $\Delta$ 1, CTF3-yeGFP-TRP1  |
| X2054 | MAT $\alpha$ , ura3-13, trp1-63, his3-1, leu2, met13-d, tyr1-1, lys2-1, can1 (R), CTF3-yeGFP-TRP1                   |
| Y1820 | MATa, leu2, lys2-2, tyr1-2, met13-c, ura3-1, trp1- $\Delta$ 63, cyh2-1, his3- $\Delta$ 1, CTF3-yeGFP-TRP1           |
| X1907 | MATa, ura3-13, trp1-63, his3-1, leu2, met13-d, tyr1-1, lys2-1, can1 (R), CNN1-yeGFP-TRP1                            |
| Y1731 | MAT $\alpha$ , leu2, lys2-2, met13-c, tyr1-2, trp1- $\Delta$ 63, cyh2-1, his3- $\Delta$ 1, ura3-1, CNN1-yeGFP-TRP1  |
| X1908 | MAT $\alpha$ , ura3-13, trp1-63, his3-1, leu2, met13-d, tyr1-1, lys2-1, can1 (R), CNN1-yeGFP-TRP1                   |
| Y1732 | MATa, leu2, lys2-2, met13-c, tyr1-2, trp1- $\Delta$ 63, cyh2-1, his3- $\Delta$ 1, ura3-1, CNN1-yeGFP-TRP1           |
| X2055 | MATa, ura3-13, trp1-63, his3-1, leu2, met13-d, tyr1-1, lys2-1, can1 (R), NDC10-yeGFP-TRP1                           |
| Y1823 | MAT $\alpha$ , leu2, lys2-2, tyr1-2, met13-c, ura3-1, trp1- $\Delta$ 63, cyh2-1, his3- $\Delta$ 1, NDC10-yeGFP-TRP1 |
| X2056 | MAT $\alpha$ , ura3-13, trp1-63, his3-1, leu2, met13-d, tyr1-1, lys2-1, can1 (R), NDC10-yeGFP-TRP1                  |
| Y1824 | MATa, leu2, lys2-2, tyr1-2, met13-c, ura3-1, trp1- $\Delta$ 63, cyh2-1, his3- $\Delta$ 1, NDC10-yeGFP-TRP1          |
| Y1821 | MAT $\alpha$ , leu2, lys2-2, tyr1-2, met13-c, ura3-1, trp1- $\Delta$ 63, cyh2-1, his3- $\Delta$ 1, MIF2-yeGFP-TRP1  |
| Y1822 | MATa, leu2, lys2-2, tyr1-2, met13-c, ura3-1, trp1- $\Delta$ 63, cyh2-1, his3- $\Delta$ 1, MIF2-yeGFP-TRP1           |
| X55   | MATa, ura3-13, trp1- $\Delta$ 63, his3- $\Delta$ 1, leu2-?, met13-d, tyr1-1, lys2-1, can1-R                         |
| Y8    | MAT $\alpha$ , ura3-1, trp1-63, his3-1, HIS7, leu2, met13-c, tyr1-2, ade2, cyh2-1 (R)                               |
| Y169  | MAT $\alpha$ , leu2-?, lys2-2, met13-c, tyr1-2, ura3-1, trp1- $\Delta$ 63, cyh2-1, his3- $\Delta$ 1                 |
| X206  | MAT $\alpha$ , ura3-13, trp1- $\Delta$ 63, leu2, tyr1-1, lys2-1, met13-d, can1-R, his3- $\Delta$ 1                  |
| Y170  | MATa, leu2-?, lys2-2, met13-c, tyr1-2, ura3-1, trp1- $\Delta$ 63, cyh2-1, his3- $\Delta$ 1                          |

|       |                                                                                                                                                                                                  |
|-------|--------------------------------------------------------------------------------------------------------------------------------------------------------------------------------------------------|
| X1471 | MAT $\alpha$ , ura3-13, trp1-63, his3-1, leu2, met13-d, tyr1-1, lys2-1, can1 (R), KanMX-PGAL1-NDT80, SPC42-[OPL29: URA3 SPC42-CFP], MTW1-3xmCherry-hphNT1, CHL4-yeGFP-TRP1                       |
| Y1435 | MAT $\alpha$ , leu2, lys2-2, met13-c, tyr1-2, trp1- $\Delta$ 63, cyh2-1, his3- $\Delta$ 1, KanMX-PGAL1-NDT80, ura3::pKB80 [PGPD1-GAL4(848)-ER-URA3::HIS], MTW1-3xmCherry-hphNT1, CHL4-yeGFP-TRP1 |
| X1472 | MAT $\alpha$ , ura3-13, trp1-63, his3-1, leu2, met13-d, tyr1-1, lys2-1, can1 (R), KanMX-PGAL1-NDT80, SPC42-[OPL29: URA3 SPC42-CFP], MTW1-3xmCherry-hphNT1, CHL4-yeGFP-TRP1                       |
| Y1436 | MAT $\alpha$ , leu2, lys2-2, met13-c, tyr1-2, trp1- $\Delta$ 63, cyh2-1, his3- $\Delta$ 1, KanMX-PGAL1-NDT80, ura3::pKB80 [PGPD1-GAL4(848)-ER-URA3::HIS], MTW1-3xmCherry-hphNT1, CHL4-yeGFP-TRP1 |
| X873  | MAT $\alpha$ , ura3-13, trp1- $\Delta$ 63, leu2-?, tyr1-1, lys2-1, met13-d, can1-R, his3- $\Delta$ 1, ndt80::LEU2                                                                                |
| Y1783 | MAT $\alpha$ , leu2, lys2-2, tyr1-2, met13-c, ura3-1, trp1- $\Delta$ 63, cyh2-1, his3- $\Delta$ 1, MTW1-3xmCherry-hphNT1, natNT2-PGAL1-NDT80, SPC25-yeGFP-TRP1                                   |
| X874  | MAT $\alpha$ , ura3-13, trp1- $\Delta$ 63, leu2-?, tyr1-1, lys2-1, met13-d, can1-R, his3- $\Delta$ 1, ndt80::LEU2                                                                                |
| Y1784 | MAT $\alpha$ , leu2, lys2-2, tyr1-2, met13-c, ura3-1, trp1- $\Delta$ 63, cyh2-1, his3- $\Delta$ 1, MTW1-3xmCherry-hphNT1, natNT2-PGAL1-NDT80, SPC25-yeGFP-TRP1                                   |
| X871  | MAT $\alpha$ , ura3-13, trp1- $\Delta$ 63, leu2-?, tyr1-1, lys2-1, met13-d, can1-R, his3- $\Delta$ 1, MTW1-GFP-URA3, ndt80::LEU2                                                                 |
| Y909  | MAT $\alpha$ , leu2, lys2-2, tyr1-2, met13-c, ura3-1, trp1- $\Delta$ 63, cyh2-1, his3- $\Delta$ 1, MTW1-GFP-URA3, SPC42-[MDE1145: URA3 SPC42-DSRed], ndt80::LEU2, his7-1                         |
| X872  | MAT $\alpha$ , ura3-13, trp1- $\Delta$ 63, leu2-?, tyr1-1, lys2-1, met13-d, can1-R, his3- $\Delta$ 1, MTW1-GFP-URA3, ndt80::LEU2                                                                 |
| Y910  | MAT $\alpha$ , leu2, lys2-2, tyr1-2, met13-c, ura3-1, trp1- $\Delta$ 63, cyh2-1, his3- $\Delta$ 1, MTW1-GFP-URA3, SPC42-[MDE1145: URA3 SPC42-DSRed], ndt80::LEU2                                 |
| X2151 | MAT $\alpha$ , ura3-13, trp1- $\Delta$ 63, his3- $\Delta$ 1, leu2-?, met13-d, tyr1-1, lys2-1, can1-R, PSCC1-CDC6 KanMX6, MTW1-GFP-URA3, ndt80::LEU2                                              |
| Y1921 | MAT $\alpha$ , leu2-?, lys2-2, met13-c, tyr1-2, ura3-1, trp1- $\Delta$ 63, cyh2-1, his3- $\Delta$ 1, PSCC1-CDC6 KANMX6, SPC42-[MDE1145: URA3 SPC42-DSRed], MTW1-GFP-URA3, ndt80::LEU2            |
| X2152 | MAT $\alpha$ , ura3-13, trp1- $\Delta$ 63, his3- $\Delta$ 1, leu2-?, met13-d, tyr1-1, lys2-1, can1-R, PSCC1-CDC6 KanMX6, MTW1-GFP-URA3, ndt80::LEU2                                              |
| Y1922 | MAT $\alpha$ , leu2-?, lys2-2, met13-c, tyr1-2, ura3-1, trp1- $\Delta$ 63, cyh2-1, his3- $\Delta$ 1, PSCC1-CDC6 KANMX6, SPC42-[MDE1145: URA3 SPC42-DSRed], MTW1-GFP-URA3, ndt80::LEU2            |
| X1217 | MAT $\alpha$ , ura3-13, trp1- $\Delta$ 63, his3- $\Delta$ 1, leu2, met13-d, tyr1-1, lys2-1, can1-R, NDC80-EGFP-KanMx4, SPC42-[MDE1145: URA3 SPC42-DSRed]                                         |
| X1218 | MAT $\alpha$ , ura3-13, trp1- $\Delta$ 63, his3- $\Delta$ 1, leu2, met13-d, tyr1-1, lys2-1, can1-R, NDC80-EGFP-KanMx4, SPC42-[MDE1145: URA3 SPC42-DSRed]                                         |
| Y1192 | MAT $\alpha$ , leu2, lys2-2, met13-c, tyr1-2, ura3-1, trp1- $\Delta$ 63, cyh2-1, his3- $\Delta$ 1, NDC80-EGFP-TRP1                                                                               |



|       |                                                                                                                                                                                                                                                     |
|-------|-----------------------------------------------------------------------------------------------------------------------------------------------------------------------------------------------------------------------------------------------------|
| X2019 | MAT $\alpha$ , ura3-13, trp1- $\Delta$ 63, his3- $\Delta$ 1, leu2-?, met13-d, tyr1-1, lys2-1, can1-R, PSCC1-CDC6 KanMX6, NDC80-EGFP-KanMx4, SPC42-[MDE1145: URA3 SPC42-DSRed]                                                                       |
| Y1799 | MAT $\alpha$ , leu2-?, lys2-2, met13-c, tyr1-2, ura3-1, trp1- $\Delta$ 63, cyh2-1, his3- $\Delta$ 1, PSCC1-CDC6 KANMX6, NDC80-EGFP-TRP1                                                                                                             |
| X2020 | MAT $\alpha$ , ura3-13, trp1- $\Delta$ 63, his3- $\Delta$ 1, leu2-?, met13-d, tyr1-1, lys2-1, can1-R, PSCC1-CDC6 KanMX6, NDC80-EGFP-KanMx4, SPC42-[MDE1145: URA3 SPC42-DSRed]                                                                       |
| Y1800 | MAT $\alpha$ , leu2-?, lys2-2, met13-c, tyr1-2, ura3-1, trp1- $\Delta$ 63, cyh2-1, his3- $\Delta$ 1, PSCC1-CDC6 KANMX6, NDC80-EGFP-TRP1                                                                                                             |
| X1673 | MAT $\alpha$ , trp1- $\Delta$ 63, his3- $\Delta$ 1, leu2, met13-d, tyr1-1, lys2-1, can1-R, MTW1-3xmCherry-hphNT1, ura3::pKB80 [PGPD1-GAL4(848)-ER-URA3::hphNT1], MAM1-yeGFP-TRP1, natNT2-PGAL1-NDT80, PCLB2-3HA-IPL1 KanMX6                         |
| Y1585 | MAT $\alpha$ , leu2, lys2-2, tyr1-2, met13-c, ura3-1, trp1- $\Delta$ 63, cyh2-1, his3- $\Delta$ 1, natNT2-PGAL1-NDT80, PCLB2-3HA-IPL1 KanMX6, MAM1-yeGFP-TRP1, MTW1-3xmCherry-hphNT1                                                                |
| X1674 | MAT $\alpha$ , trp1- $\Delta$ 63, his3- $\Delta$ 1, leu2, met13-d, tyr1-1, lys2-1, can1-R, MTW1-3xmCherry-hphNT1, ura3::pKB80 [PGPD1-GAL4(848)-ER-URA3::hphNT1], MAM1-yeGFP-TRP1, natNT2-PGAL1-NDT80, PCLB2-3HA-IPL1 KanMX6                         |
| X2289 | MAT $\alpha$ , trp1- $\Delta$ 63, his3- $\Delta$ 1, leu2, met13-d, tyr1-1, lys2-1, can1-R, MTW1-3xmCherry-hphNT1, ura3::pKB80 [PGPD1-GAL4(848)-ER-URA3::hphNT1], MAM1-yeGFP-TRP1, natNT2-PGAL1-NDT80, PCLB2-3HA-NDC80 KanMX6                        |
| Y2133 | MAT $\alpha$ , leu2, lys2-2, tyr1-2, met13-c, ura3-1, trp1- $\Delta$ 63, cyh2-1, his3- $\Delta$ 1, natNT2-PGAL1-NDT80, MAM1-yeGFP-TRP1, MTW1-3xmCherry-hphNT1, PCLB2-3HA-NDC80 KanMX6                                                               |
| X2290 | MAT $\alpha$ , trp1- $\Delta$ 63, his3- $\Delta$ 1, leu2, met13-d, tyr1-1, lys2-1, can1-R, MTW1-3xmCherry-hphNT1, ura3::pKB80 [PGPD1-GAL4(848)-ER-URA3::hphNT1], MAM1-yeGFP-TRP1, natNT2-PGAL1-NDT80, PCLB2-3HA-NDC80 KanMX6                        |
| Y2134 | MAT $\alpha$ , leu2, lys2-2, tyr1-2, met13-c, ura3-1, trp1- $\Delta$ 63, cyh2-1, his3- $\Delta$ 1, natNT2-PGAL1-NDT80, MAM1-yeGFP-TRP1, MTW1-3xmCherry-hphNT1, PCLB2-3HA-NDC80 KanMX6                                                               |
| X2287 | MAT $\alpha$ , trp1- $\Delta$ 63, his3- $\Delta$ 1, leu2, met13-d, tyr1-1, lys2-1, can1-R, MTW1-3xmCherry-hphNT1, ura3::pKB80 [PGPD1-GAL4(848)-ER-URA3::hphNT1], MAM1-yeGFP-TRP1, natNT2-PGAL1-NDT80, PCLB2-3HA-IPL1 KanMX6, PCLB2-3HA-NDC80 KanMX6 |
| Y2131 | MAT $\alpha$ , leu2, lys2-2, tyr1-2, met13-c, ura3-1, trp1- $\Delta$ 63, cyh2-1, his3- $\Delta$ 1, natNT2-PGAL1-NDT80, PCLB2-3HA-IPL1 KanMX6, MAM1-yeGFP-TRP1, MTW1-3xmCherry-hphNT1, PCLB2-3HA-NDC80 KanMX6                                        |
| X2298 | MAT $\alpha$ , trp1- $\Delta$ 63, his3- $\Delta$ 1, leu2, met13-d, tyr1-1, lys2-1, can1-R, MTW1-3xmCherry-hphNT1, ura3::pKB80 [PGPD1-GAL4(848)-ER-URA3::hphNT1], MAM1-yeGFP-TRP1, natNT2-PGAL1-NDT80, PCLB2-3HA-IPL1 KanMX6, PCLB2-3HA-NDC80 KanMX6 |
| Y2132 | MAT $\alpha$ , leu2, lys2-2, tyr1-2, met13-c, ura3-1, trp1- $\Delta$ 63, cyh2-1, his3- $\Delta$ 1, natNT2-PGAL1-NDT80, PCLB2-3HA-IPL1 KanMX6, MAM1-yeGFP-TRP1, MTW1-3xmCherry-hphNT1, PCLB2-3HA-NDC80 KanMX6                                        |

|       |                                                                                                                                                                                                               |
|-------|---------------------------------------------------------------------------------------------------------------------------------------------------------------------------------------------------------------|
| X1677 | MAT <sub>a</sub> , trp1-Δ63, his3-Δ1, leu2, met13-d, tyr1-1, lys2-1, can1-R, MTW1-3xmCherry-hphNT1, ura3::pKB80 [PGPD1-GAL4(848)-ER-URA3::hphNT1], PCLB2-3HA-IPL1 KanMX6, natNT2-PGAL1-NDT80, NDC80-EGFP-TRP1 |
| Y2119 | MAT <sub>α</sub> , leu2, lys2-2, tyr1-2, met13-c, ura3-1, trp1-Δ63, cyh2-1, his3-Δ1, natNT2-PGAL1-NDT80, MTW1-3xmCherry-hphNT1, NDC80-EGFP-TRP1, PCLB2-3HA-IPL1 KanMX6                                        |
| X1678 | MAT <sub>α</sub> , trp1-Δ63, his3-Δ1, leu2, met13-d, tyr1-1, lys2-1, can1-R, MTW1-3xmCherry-hphNT1, ura3::pKB80 [PGPD1-GAL4(848)-ER-URA3::hphNT1], PCLB2-3HA-IPL1 KanMX6, natNT2-PGAL1-NDT80, NDC80-EGFP-TRP1 |
| Y2120 | MAT <sub>a</sub> , leu2, lys2-2, tyr1-2, met13-c, ura3-1, trp1-Δ63, cyh2-1, his3-Δ1, natNT2-PGAL1-NDT80, MTW1-3xmCherry-hphNT1, NDC80-EGFP-TRP1, PCLB2-3HA-IPL1 KanMX6                                        |
| X1581 | MAT <sub>a</sub> , ura3::pKB80 [PGPD1-GAL4(848)-ER-URA3::hphNT1], trp1-63, his3-1, leu2, met13-d, tyr1-1, lys2-1, can1 (R), SPC42-[MDE1145: URA3::HIS SPC42-DSRed], natNT2-PGAL1-NDT80                        |
| Y1507 | MAT <sub>α</sub> , leu2, lys2-2, tyr1-2, met13-c, ura3::pAFS125[PHIS3-GFP-TUB1, URA3], trp1-Δ63, cyh2-1, his3-Δ1, natNT2-PGAL1-NDT80                                                                          |
| X1582 | MAT <sub>α</sub> , ura3::pKB80 [PGPD1-GAL4(848)-ER-URA3::hphNT1], trp1-63, his3-1, leu2, met13-d, tyr1-1, lys2-1, can1 (R), SPC42-[MDE1145: URA3::HIS SPC42-DSRed], natNT2-PGAL1-NDT80                        |
| Y1508 | MAT <sub>a</sub> , leu2, lys2-2, tyr1-2, met13-c, ura3::pAFS125[PHIS3-GFP-TUB1, URA3], trp1-Δ63, cyh2-1, his3-Δ1, natNT2-PGAL1-NDT80                                                                          |
| Y1581 | MAT <sub>α</sub> , leu2, lys2-2, tyr1-2, met13-c, ura3-1, trp1-Δ63, cyh2-1, his3-Δ1, natNT2-PGAL1-NDT80, MTW1-3xmCherry-hphNT1, ipl1ΔKAN:ipl1-as5-MYC:HIS3:LEU2, MAM1-yeGFP-TRP1                              |

Table S3. Descriptors used for the selected reaction monitoring experiment. Each protein was quantified by the detection of three peptides formed in a tryptic digest. The m/z resolution was set to 0.7Da for both the parent ion m/z and production ion m/z. The collision energy was set based on the parent ion m/z. Scheduling was used to defined a time window in which the peptide eluted, as seen in the start time and end time.

| Parent ion, m/z | Fragment ion, m/z | Collision energy, eV | Start time | End time | Charge | Peptide sequence | Gene name   |
|-----------------|-------------------|----------------------|------------|----------|--------|------------------|-------------|
| 623.83          | 243.13            | 25                   | 18.7       | 23.7     | +      | LESLLNSVDK       | <i>MTW1</i> |
| 623.83          | 448.24            | 25                   | 18.7       | 23.7     | +      | LESLLNSVDK       |             |
| 623.83          | 562.28            | 25                   | 18.7       | 23.7     | +      | LESLLNSVDK       |             |
| 623.83          | 691.33            | 25                   | 18.7       | 23.7     | +      | LESLLNSVDK       |             |
| 623.83          | 804.41            | 25                   | 18.7       | 23.7     | +      | LESLLNSVDK       |             |
| 623.83          | 917.49            | 25                   | 18.7       | 23.7     | +      | LESLLNSVDK       |             |
| 623.83          | 1004.53           | 25                   | 18.7       | 23.7     | +      | LESLLNSVDK       |             |
| 623.83          | 1133.57           | 25                   | 18.7       | 23.7     | +      | LESLLNSVDK       |             |
| 643.85          | 229.12            | 25                   | 19.9       | 24.9     | +      | DLVIVDENELK      |             |
| 643.85          | 389.24            | 25                   | 19.9       | 24.9     | +      | DLVIVDENELK      |             |
| 643.85          | 503.28            | 25                   | 19.9       | 24.9     | +      | DLVIVDENELK      |             |
| 643.85          | 632.33            | 25                   | 19.9       | 24.9     | +      | DLVIVDENELK      |             |
| 643.85          | 747.35            | 25                   | 19.9       | 24.9     | +      | DLVIVDENELK      |             |
| 643.85          | 846.42            | 25                   | 19.9       | 24.9     | +      | DLVIVDENELK      |             |
| 643.85          | 959.50            | 25                   | 19.9       | 24.9     | +      | DLVIVDENELK      |             |
| 643.85          | 1058.57           | 25                   | 19.9       | 24.9     | +      | DLVIVDENELK      |             |
| 733.37          | 211.14            | 28                   | 21.1       | 26.1     | +      | IPEEYLDANVFR     |             |
| 733.37          | 535.30            | 28                   | 21.1       | 26.1     | +      | IPEEYLDANVFR     |             |
| 733.37          | 606.34            | 28                   | 21.1       | 26.1     | +      | IPEEYLDANVFR     |             |
| 733.37          | 676.83            | 28                   | 21.1       | 26.1     | +      | IPEEYLDANVFR     |             |
| 733.37          | 721.36            | 28                   | 21.1       | 26.1     | +      | IPEEYLDANVFR     |             |
| 733.37          | 834.45            | 28                   | 21.1       | 26.1     | +      | IPEEYLDANVFR     |             |
| 733.37          | 997.51            | 28                   | 21.1       | 26.1     | +      | IPEEYLDANVFR     |             |
| 733.37          | 1126.55           | 28                   | 21.1       | 26.1     | +      | IPEEYLDANVFR     |             |
| 733.37          | 1255.60           | 28                   | 21.1       | 26.1     | +      | IPEEYLDANVFR     |             |
| 378.74          | 171.11            | 16                   | 15.9       | 20.9     | +      | IGVLQAR          | <i>NSL1</i> |
| 378.74          | 374.21            | 16                   | 15.9       | 20.9     | +      | IGVLQAR          |             |
| 378.74          | 487.30            | 16                   | 15.9       | 20.9     | +      | IGVLQAR          |             |
| 378.74          | 586.37            | 16                   | 15.9       | 20.9     | +      | IGVLQAR          |             |
| 378.74          | 643.39            | 16                   | 15.9       | 20.9     | +      | IGVLQAR          |             |
| 590.29          | 245.08            | 23                   | 18.0       | 23.0     | +      | DEYLAQLDGR       |             |
| 590.29          | 460.25            | 23                   | 18.0       | 23.0     | +      | DEYLAQLDGR       |             |
| 590.29          | 588.31            | 23                   | 18.0       | 23.0     | +      | DEYLAQLDGR       |             |
| 590.29          | 659.35            | 23                   | 18.0       | 23.0     | +      | DEYLAQLDGR       |             |
| 590.29          | 772.43            | 23                   | 18.0       | 23.0     | +      | DEYLAQLDGR       |             |
| 590.29          | 935.49            | 23                   | 18.0       | 23.0     | +      | DEYLAQLDGR       |             |
| 616.33          | 201.12            | 24                   | 16.7       | 21.7     | +      | SLEVVNADTVGK     |             |
| 616.33          | 519.28            | 24                   | 16.7       | 21.7     | +      | SLEVVNADTVGK     |             |
| 616.33          | 590.31            | 24                   | 16.7       | 21.7     | +      | SLEVVNADTVGK     |             |
| 616.33          | 704.36            | 24                   | 16.7       | 21.7     | +      | SLEVVNADTVGK     |             |
| 616.33          | 803.43            | 24                   | 16.7       | 21.7     | +      | SLEVVNADTVGK     |             |
| 616.33          | 902.49            | 24                   | 16.7       | 21.7     | +      | SLEVVNADTVGK     |             |
| 616.33          | 1031.54           | 24                   | 16.7       | 21.7     | +      | SLEVVNADTVGK     |             |
| 778.37          | 243.11            | 30                   | 16.0       | 21.0     | +      | NQEEEGELEHLTK    | <i>DSN1</i> |
| 778.37          | 627.35            | 30                   | 16.0       | 21.0     | +      | NQEEEGELEHLTK    |             |
| 778.37          | 926.49            | 30                   | 16.0       | 21.0     | +      | NQEEEGELEHLTK    |             |
| 778.37          | 1055.54           | 30                   | 16.0       | 21.0     | +      | NQEEEGELEHLTK    |             |
| 778.37          | 1184.58           | 30                   | 16.0       | 21.0     | +      | NQEEEGELEHLTK    |             |
| 855.89          | 227.18            | 32                   | 17.0       | 22.0     | +      | ILDNTENYDDTELK   |             |
| 855.89          | 518.29            | 32                   | 17.0       | 22.0     | +      | ILDNTENYDDTELK   |             |
| 855.89          | 748.35            | 32                   | 17.0       | 22.0     | +      | ILDNTENYDDTELK   |             |

|        |         |    |      |      |   |                    |              |
|--------|---------|----|------|------|---|--------------------|--------------|
| 855.89 | 911.41  | 32 | 17.0 | 22.0 | + | ILDNTENYDDTELR     |              |
| 855.89 | 1025.45 | 32 | 17.0 | 22.0 | + | ILDNTENYDDTELR     |              |
| 855.89 | 1154.50 | 32 | 17.0 | 22.0 | + | ILDNTENYDDTELR     |              |
| 855.89 | 1255.54 | 32 | 17.0 | 22.0 | + | ILDNTENYDDTELR     |              |
| 994.47 | 680.34  | 35 | 22.7 | 27.7 | + | DIPEEDFYTVVGNASFGK |              |
| 994.47 | 779.40  | 35 | 22.7 | 27.7 | + | DIPEEDFYTVVGNASFGK |              |
| 994.47 | 880.41  | 35 | 22.7 | 27.7 | + | DIPEEDFYTVVGNASFGK |              |
| 994.47 | 979.52  | 35 | 22.7 | 27.7 | + | DIPEEDFYTVVGNASFGK |              |
| 994.47 | 1289.65 | 35 | 22.7 | 27.7 | + | DIPEEDFYTVVGNASFGK |              |
| <hr/>  |         |    |      |      |   |                    |              |
| 595.30 | 229.12  | 24 | 16.2 | 21.2 | + | DLETQVEVEK         | <i>NNF1</i>  |
| 595.30 | 375.22  | 24 | 16.2 | 21.2 | + | DLETQVEVEK         |              |
| 595.30 | 504.27  | 24 | 16.2 | 21.2 | + | DLETQVEVEK         |              |
| 595.30 | 603.33  | 24 | 16.2 | 21.2 | + | DLETQVEVEK         |              |
| 595.30 | 832.44  | 24 | 16.2 | 21.2 | + | DLETQVEVEK         |              |
| 595.30 | 961.48  | 24 | 16.2 | 21.2 | + | DLETQVEVEK         |              |
| 700.39 | 218.15  | 28 | 23.4 | 28.4 | + | LNELDELILEAK       |              |
| 700.39 | 228.13  | 28 | 23.4 | 28.4 | + | LNELDELILEAK       |              |
| 700.39 | 460.28  | 28 | 23.4 | 28.4 | + | LNELDELILEAK       |              |
| 700.39 | 573.36  | 28 | 23.4 | 28.4 | + | LNELDELILEAK       |              |
| 700.39 | 686.44  | 28 | 23.4 | 28.4 | + | LNELDELILEAK       |              |
| 700.39 | 815.49  | 28 | 23.4 | 28.4 | + | LNELDELILEAK       |              |
| 700.39 | 930.51  | 28 | 23.4 | 28.4 | + | LNELDELILEAK       |              |
| 700.39 | 1043.60 | 28 | 23.4 | 28.4 | + | LNELDELILEAK       |              |
| 700.39 | 1172.64 | 28 | 23.4 | 28.4 | + | LNELDELILEAK       |              |
| 708.34 | 187.11  | 28 | 16.7 | 21.7 | + | VSSC[160]FPQYVNSK  |              |
| 708.34 | 447.26  | 28 | 16.7 | 21.7 | + | VSSC[160]FPQYVNSK  |              |
| 708.34 | 610.32  | 28 | 16.7 | 21.7 | + | VSSC[160]FPQYVNSK  |              |
| 708.34 | 835.43  | 28 | 16.7 | 21.7 | + | VSSC[160]FPQYVNSK  |              |
| 708.34 | 982.50  | 28 | 16.7 | 21.7 | + | VSSC[160]FPQYVNSK  |              |
| 708.34 | 1229.56 | 28 | 16.7 | 21.7 | + | VSSC[160]FPQYVNSK  |              |
| <hr/>  |         |    |      |      |   |                    |              |
| 555.80 | 261.12  | 22 | 20.1 | 25.1 | + | YPFLESINK          | <i>NDC80</i> |
| 555.80 | 461.27  | 22 | 20.1 | 25.1 | + | YPFLESINK          |              |
| 555.80 | 474.26  | 22 | 20.1 | 25.1 | + | YPFLESINK          |              |
| 555.80 | 590.31  | 22 | 20.1 | 25.1 | + | YPFLESINK          |              |
| 555.80 | 703.40  | 22 | 20.1 | 25.1 | + | YPFLESINK          |              |
| 555.80 | 850.47  | 22 | 20.1 | 25.1 | + | YPFLESINK          |              |
| 555.80 | 947.52  | 22 | 20.1 | 25.1 | + | YPFLESINK          |              |
| 696.36 | 227.18  | 27 | 23.4 | 28.4 | + | LLIDYFTESYK        |              |
| 696.36 | 397.21  | 27 | 23.4 | 28.4 | + | LLIDYFTESYK        |              |
| 696.36 | 526.25  | 27 | 23.4 | 28.4 | + | LLIDYFTESYK        |              |
| 696.36 | 627.30  | 27 | 23.4 | 28.4 | + | LLIDYFTESYK        |              |
| 696.36 | 774.37  | 27 | 23.4 | 28.4 | + | LLIDYFTESYK        |              |
| 696.36 | 937.43  | 27 | 23.4 | 28.4 | + | LLIDYFTESYK        |              |
| 696.36 | 1052.46 | 27 | 23.4 | 28.4 | + | LLIDYFTESYK        |              |
| 696.36 | 1165.54 | 27 | 23.4 | 28.4 | + | LLIDYFTESYK        |              |
| 839.91 | 171.11  | 32 | 17.7 | 22.7 | + | GISTEQFELQNQER     |              |
| 839.91 | 546.26  | 32 | 17.7 | 22.7 | + | GISTEQFELQNQER     |              |
| 839.91 | 674.32  | 32 | 17.7 | 22.7 | + | GISTEQFELQNQER     |              |
| 839.91 | 787.41  | 32 | 17.7 | 22.7 | + | GISTEQFELQNQER     |              |
| 839.91 | 916.45  | 32 | 17.7 | 22.7 | + | GISTEQFELQNQER     |              |
| 839.91 | 1063.52 | 32 | 17.7 | 22.7 | + | GISTEQFELQNQER     |              |
| 839.91 | 1191.58 | 32 | 17.7 | 22.7 | + | GISTEQFELQNQER     |              |
| <hr/>  |         |    |      |      |   |                    |              |
| 553.32 | 227.18  | 22 | 18.7 | 23.7 | + | LLSAVVNYAR         | <i>NUF2</i>  |
| 553.32 | 523.26  | 22 | 18.7 | 23.7 | + | LLSAVVNYAR         |              |
| 553.32 | 622.33  | 22 | 18.7 | 23.7 | + | LLSAVVNYAR         |              |
| 553.32 | 721.40  | 22 | 18.7 | 23.7 | + | LLSAVVNYAR         |              |
| 553.32 | 792.44  | 22 | 18.7 | 23.7 | + | LLSAVVNYAR         |              |
| 553.32 | 879.47  | 22 | 18.7 | 23.7 | + | LLSAVVNYAR         |              |

|        |         |    |      |      |   |                   |        |
|--------|---------|----|------|------|---|-------------------|--------|
| 557.32 | 303.18  | 22 | 19.7 | 24.7 | + | ELNDLLIQR         |        |
| 557.32 | 416.26  | 22 | 19.7 | 24.7 | + | ELNDLLIQR         |        |
| 557.32 | 529.35  | 22 | 19.7 | 24.7 | + | ELNDLLIQR         |        |
| 557.32 | 642.43  | 22 | 19.7 | 24.7 | + | ELNDLLIQR         |        |
| 557.32 | 757.46  | 22 | 19.7 | 24.7 | + | ELNDLLIQR         |        |
| 557.32 | 871.50  | 22 | 19.7 | 24.7 | + | ELNDLLIQR         |        |
| 566.80 | 215.14  | 23 | 15.3 | 20.3 | + | TLDDLTAQQK        |        |
| 566.80 | 474.27  | 23 | 15.3 | 20.3 | + | TLDDLTAQQK        |        |
| 566.80 | 575.31  | 23 | 15.3 | 20.3 | + | TLDDLTAQQK        |        |
| 566.80 | 688.40  | 23 | 15.3 | 20.3 | + | TLDDLTAQQK        |        |
| 566.80 | 803.43  | 23 | 15.3 | 20.3 | + | TLDDLTAQQK        |        |
| 566.80 | 918.45  | 23 | 15.3 | 20.3 | + | TLDDLTAQQK        |        |
| <hr/>  |         |    |      |      |   |                   |        |
| 409.21 | 229.12  | 17 | 15.7 | 20.7 | + | DLDGLER           | SPC24  |
| 409.21 | 304.16  | 17 | 15.7 | 20.7 | + | DLDGLER           |        |
| 409.21 | 417.25  | 17 | 15.7 | 20.7 | + | DLDGLER           |        |
| 409.21 | 474.27  | 17 | 15.7 | 20.7 | + | DLDGLER           |        |
| 409.21 | 589.29  | 17 | 15.7 | 20.7 | + | DLDGLER           |        |
| 409.21 | 702.38  | 17 | 15.7 | 20.7 | + | DLDGLER           |        |
| 624.31 | 203.07  | 25 | 14.9 | 19.9 | + | DSEIISTPNGSK      |        |
| 624.31 | 291.17  | 25 | 14.9 | 19.9 | + | DSEIISTPNGSK      |        |
| 624.31 | 405.21  | 25 | 14.9 | 19.9 | + | DSEIISTPNGSK      |        |
| 624.31 | 502.26  | 25 | 14.9 | 19.9 | + | DSEIISTPNGSK      |        |
| 624.31 | 603.31  | 25 | 14.9 | 19.9 | + | DSEIISTPNGSK      |        |
| 624.31 | 690.34  | 25 | 14.9 | 19.9 | + | DSEIISTPNGSK      |        |
| 624.31 | 803.43  | 25 | 14.9 | 19.9 | + | DSEIISTPNGSK      |        |
| 624.31 | 916.51  | 25 | 14.9 | 19.9 | + | DSEIISTPNGSK      |        |
| 624.31 | 1045.55 | 25 | 14.9 | 19.9 | + | DSEIISTPNGSK      |        |
| 708.87 | 407.27  | 27 | 23.6 | 28.6 | + | DNLLDNPVEFLK      |        |
| 708.87 | 536.31  | 27 | 23.6 | 28.6 | + | DNLLDNPVEFLK      |        |
| 708.87 | 732.43  | 27 | 23.6 | 28.6 | + | DNLLDNPVEFLK      |        |
| 708.87 | 846.47  | 27 | 23.6 | 28.6 | + | DNLLDNPVEFLK      |        |
| 708.87 | 961.50  | 27 | 23.6 | 28.6 | + | DNLLDNPVEFLK      |        |
| 708.87 | 1074.58 | 27 | 23.6 | 28.6 | + | DNLLDNPVEFLK      |        |
| <hr/>  |         |    |      |      |   |                   |        |
| 436.25 | 215.10  | 18 | 16.8 | 21.8 | + | DVAQVLAR          | SPC25  |
| 436.25 | 246.16  | 18 | 16.8 | 21.8 | + | DVAQVLAR          |        |
| 436.25 | 359.24  | 18 | 16.8 | 21.8 | + | DVAQVLAR          |        |
| 436.25 | 458.31  | 18 | 16.8 | 21.8 | + | DVAQVLAR          |        |
| 436.25 | 586.37  | 18 | 16.8 | 21.8 | + | DVAQVLAR          |        |
| 436.25 | 657.40  | 18 | 16.8 | 21.8 | + | DVAQVLAR          |        |
| 471.72 | 247.14  | 19 | 17.7 | 22.7 | + | FVFGDDSR          |        |
| 471.72 | 377.18  | 19 | 17.7 | 22.7 | + | FVFGDDSR          |        |
| 471.72 | 549.23  | 19 | 17.7 | 22.7 | + | FVFGDDSR          |        |
| 471.72 | 696.29  | 19 | 17.7 | 22.7 | + | FVFGDDSR          |        |
| 925.94 | 258.12  | 35 | 18.7 | 23.7 | + | WAAQSGNDAAEVALYER |        |
| 925.94 | 467.22  | 35 | 18.7 | 23.7 | + | WAAQSGNDAAEVALYER |        |
| 925.94 | 651.35  | 35 | 18.7 | 23.7 | + | WAAQSGNDAAEVALYER |        |
| 925.94 | 750.41  | 35 | 18.7 | 23.7 | + | WAAQSGNDAAEVALYER |        |
| 925.94 | 879.46  | 35 | 18.7 | 23.7 | + | WAAQSGNDAAEVALYER |        |
| 925.94 | 950.49  | 35 | 18.7 | 23.7 | + | WAAQSGNDAAEVALYER |        |
| 925.94 | 1021.53 | 35 | 18.7 | 23.7 | + | WAAQSGNDAAEVALYER |        |
| 925.94 | 1136.56 | 35 | 18.7 | 23.7 | + | WAAQSGNDAAEVALYER |        |
| 925.94 | 1250.60 | 35 | 18.7 | 23.7 | + | WAAQSGNDAAEVALYER |        |
| 925.94 | 1307.62 | 35 | 18.7 | 23.7 | + | WAAQSGNDAAEVALYER |        |
| 925.94 | 1394.65 | 35 | 18.7 | 23.7 | + | WAAQSGNDAAEVALYER |        |
| <hr/>  |         |    |      |      |   |                   |        |
| 466.26 | 202.08  | 19 | 19.0 | 24.0 | + | SNDILTLR          | SPC105 |
| 466.26 | 389.25  | 19 | 19.0 | 24.0 | + | SNDILTLR          |        |
| 466.26 | 502.33  | 19 | 19.0 | 24.0 | + | SNDILTLR          |        |
| 466.26 | 615.42  | 19 | 19.0 | 24.0 | + | SNDILTLR          |        |

|        |         |    |      |      |   |                |              |
|--------|---------|----|------|------|---|----------------|--------------|
| 466.26 | 730.45  | 19 | 19.0 | 24.0 | + | SNDILTLR       |              |
| 524.81 | 201.12  | 21 | 19.8 | 24.8 | + | ISGVLPSFTK     |              |
| 524.81 | 579.31  | 21 | 19.8 | 24.8 | + | ISGVLPSFTK     |              |
| 524.81 | 692.40  | 21 | 19.8 | 24.8 | + | ISGVLPSFTK     |              |
| 524.81 | 848.49  | 21 | 19.8 | 24.8 | + | ISGVLPSFTK     |              |
| 524.81 | 935.52  | 21 | 19.8 | 24.8 | + | ISGVLPSFTK     |              |
| 784.40 | 277.12  | 30 | 22.9 | 27.9 | + | EFINEVGVGFLDTK |              |
| 784.40 | 680.36  | 30 | 22.9 | 27.9 | + | EFINEVGVGFLDTK |              |
| 784.40 | 779.43  | 30 | 22.9 | 27.9 | + | EFINEVGVGFLDTK |              |
| 784.40 | 836.45  | 30 | 22.9 | 27.9 | + | EFINEVGVGFLDTK |              |
| 784.40 | 935.52  | 30 | 22.9 | 27.9 | + | EFINEVGVGFLDTK |              |
| 784.40 | 1064.56 | 30 | 22.9 | 27.9 | + | EFINEVGVGFLDTK |              |
| 784.40 | 1178.61 | 30 | 22.9 | 27.9 | + | EFINEVGVGFLDTK |              |
| <hr/>  |         |    |      |      |   |                |              |
| 553.25 | 230.08  | 22 | 14.5 | 19.5 | + | NDESLDVEGK     | <i>KRE28</i> |
| 553.25 | 333.18  | 22 | 14.5 | 19.5 | + | NDESLDVEGK     |              |
| 553.25 | 432.25  | 22 | 14.5 | 19.5 | + | NDESLDVEGK     |              |
| 553.25 | 547.27  | 22 | 14.5 | 19.5 | + | NDESLDVEGK     |              |
| 553.25 | 660.36  | 22 | 14.5 | 19.5 | + | NDESLDVEGK     |              |
| 553.25 | 747.39  | 22 | 14.5 | 19.5 | + | NDESLDVEGK     |              |
| 553.25 | 876.43  | 22 | 14.5 | 19.5 | + | NDESLDVEGK     |              |
| 681.35 | 634.34  | 26 | 19.6 | 24.6 | + | AGGNIVTDIEASSK |              |
| 681.35 | 749.37  | 26 | 19.6 | 24.6 | + | AGGNIVTDIEASSK |              |
| 681.35 | 850.42  | 26 | 19.6 | 24.6 | + | AGGNIVTDIEASSK |              |
| 681.35 | 949.48  | 26 | 19.6 | 24.6 | + | AGGNIVTDIEASSK |              |
| 681.35 | 1062.57 | 26 | 19.6 | 24.6 | + | AGGNIVTDIEASSK |              |
| 919.45 | 215.14  | 35 | 26.6 | 31.6 | + | LTYLEQETLDYFFR |              |
| 919.45 | 469.26  | 35 | 26.6 | 31.6 | + | LTYLEQETLDYFFR |              |
| 919.45 | 632.32  | 35 | 26.6 | 31.6 | + | LTYLEQETLDYFFR |              |
| 919.45 | 747.35  | 35 | 26.6 | 31.6 | + | LTYLEQETLDYFFR |              |
| 919.45 | 860.43  | 35 | 26.6 | 31.6 | + | LTYLEQETLDYFFR |              |
| 919.45 | 961.48  | 35 | 26.6 | 31.6 | + | LTYLEQETLDYFFR |              |
| 919.45 | 1090.52 | 35 | 26.6 | 31.6 | + | LTYLEQETLDYFFR |              |
| 919.45 | 1218.58 | 35 | 26.6 | 31.6 | + | LTYLEQETLDYFFR |              |
| 919.45 | 1347.62 | 35 | 26.6 | 31.6 | + | LTYLEQETLDYFFR |              |
| <hr/>  |         |    |      |      |   |                |              |
| 476.75 | 260.20  | 20 | 17.8 | 22.8 | + | FEDSTLLK       | <i>CTF19</i> |
| 476.75 | 474.33  | 20 | 17.8 | 22.8 | + | FEDSTLLK       |              |
| 476.75 | 561.36  | 20 | 17.8 | 22.8 | + | FEDSTLLK       |              |
| 476.75 | 676.39  | 20 | 17.8 | 22.8 | + | FEDSTLLK       |              |
| 500.79 | 228.13  | 20 | 16.4 | 21.4 | + | INGLTNLQK      |              |
| 500.79 | 275.17  | 20 | 16.4 | 21.4 | + | INGLTNLQK      |              |
| 500.79 | 502.30  | 20 | 16.4 | 21.4 | + | INGLTNLQK      |              |
| 500.79 | 603.35  | 20 | 16.4 | 21.4 | + | INGLTNLQK      |              |
| 500.79 | 716.43  | 20 | 16.4 | 21.4 | + | INGLTNLQK      |              |
| 500.79 | 773.45  | 20 | 16.4 | 21.4 | + | INGLTNLQK      |              |
| 500.79 | 887.49  | 20 | 16.4 | 21.4 | + | INGLTNLQK      |              |
| 687.41 | 159.08  | 27 | 28.9 | 33.9 | + | TGIFQNLINLLK   |              |
| 687.41 | 260.20  | 27 | 28.9 | 33.9 | + | TGIFQNLINLLK   |              |
| 687.41 | 373.28  | 27 | 28.9 | 33.9 | + | TGIFQNLINLLK   |              |
| 687.41 | 487.32  | 27 | 28.9 | 33.9 | + | TGIFQNLINLLK   |              |
| 687.41 | 600.41  | 27 | 28.9 | 33.9 | + | TGIFQNLINLLK   |              |
| 687.41 | 713.49  | 27 | 28.9 | 33.9 | + | TGIFQNLINLLK   |              |
| 687.41 | 827.53  | 27 | 28.9 | 33.9 | + | TGIFQNLINLLK   |              |
| 687.41 | 955.59  | 27 | 28.9 | 33.9 | + | TGIFQNLINLLK   |              |
| 687.41 | 1102.66 | 27 | 28.9 | 33.9 | + | TGIFQNLINLLK   |              |
| <hr/>  |         |    |      |      |   |                |              |
| 401.25 | 243.13  | 17 | 17.0 | 22.0 | + | LEAILSR        | <i>OKP1</i>  |
| 401.25 | 375.24  | 17 | 17.0 | 22.0 | + | LEAILSR        |              |
| 401.25 | 488.32  | 17 | 17.0 | 22.0 | + | LEAILSR        |              |
| 401.25 | 559.36  | 17 | 17.0 | 22.0 | + | LEAILSR        |              |

|        |         |    |      |      |   |                  |       |
|--------|---------|----|------|------|---|------------------|-------|
| 401.25 | 688.40  | 17 | 17.0 | 22.0 | + | LEAILSR          |       |
| 629.81 | 229.12  | 25 | 20.7 | 25.7 | + | DL DIEIYISK      |       |
| 629.81 | 344.15  | 25 | 20.7 | 25.7 | + | DL DIEIYISK      |       |
| 629.81 | 397.21  | 25 | 20.7 | 25.7 | + | DL DIEIYISK      |       |
| 629.81 | 510.29  | 25 | 20.7 | 25.7 | + | DL DIEIYISK      |       |
| 629.81 | 673.36  | 25 | 20.7 | 25.7 | + | DL DIEIYISK      |       |
| 629.81 | 802.40  | 25 | 20.7 | 25.7 | + | DL DIEIYISK      |       |
| 629.81 | 915.48  | 25 | 20.7 | 25.7 | + | DL DIEIYISK      |       |
| 629.81 | 1030.51 | 25 | 20.7 | 25.7 | + | DL DIEIYISK      |       |
| 883.46 | 227.18  | 33 | 23.4 | 28.4 | + | LLETNTVSALDSVFEK |       |
| 883.46 | 724.35  | 33 | 23.4 | 28.4 | + | LLETNTVSALDSVFEK |       |
| 883.46 | 837.44  | 33 | 23.4 | 28.4 | + | LLETNTVSALDSVFEK |       |
| 883.46 | 995.50  | 33 | 23.4 | 28.4 | + | LLETNTVSALDSVFEK |       |
| 883.46 | 1094.57 | 33 | 23.4 | 28.4 | + | LLETNTVSALDSVFEK |       |
| 883.46 | 1309.66 | 33 | 23.4 | 28.4 | + | LLETNTVSALDSVFEK |       |
| 883.46 | 1410.71 | 33 | 23.4 | 28.4 | + | LLETNTVSALDSVFEK |       |
| 482.22 | 230.08  | 20 | 12.6 | 17.6 | + | NDEDLTTR         | AME1  |
| 482.22 | 359.12  | 20 | 12.6 | 17.6 | + | NDEDLTTR         |       |
| 482.22 | 377.21  | 20 | 12.6 | 17.6 | + | NDEDLTTR         |       |
| 482.22 | 490.30  | 20 | 12.6 | 17.6 | + | NDEDLTTR         |       |
| 482.22 | 605.33  | 20 | 12.6 | 17.6 | + | NDEDLTTR         |       |
| 482.22 | 734.37  | 20 | 12.6 | 17.6 | + | NDEDLTTR         |       |
| 482.22 | 849.39  | 20 | 12.6 | 17.6 | + | NDEDLTTR         |       |
| 576.79 | 278.11  | 23 | 20.3 | 25.3 | + | YNFDDIPR         |       |
| 576.79 | 385.26  | 23 | 20.3 | 25.3 | + | YNFDDIPR         |       |
| 576.79 | 498.34  | 23 | 20.3 | 25.3 | + | YNFDDIPR         |       |
| 576.79 | 613.37  | 23 | 20.3 | 25.3 | + | YNFDDIPR         |       |
| 576.79 | 728.39  | 23 | 20.3 | 25.3 | + | YNFDDIPR         |       |
| 576.79 | 875.46  | 23 | 20.3 | 25.3 | + | YNFDDIPR         |       |
| 587.84 | 204.13  | 24 | 20.8 | 25.8 | + | LNDLTSTLLGK      |       |
| 587.84 | 228.13  | 24 | 20.8 | 25.8 | + | LNDLTSTLLGK      |       |
| 587.84 | 317.22  | 24 | 20.8 | 25.8 | + | LNDLTSTLLGK      |       |
| 587.84 | 343.16  | 24 | 20.8 | 25.8 | + | LNDLTSTLLGK      |       |
| 587.84 | 430.30  | 24 | 20.8 | 25.8 | + | LNDLTSTLLGK      |       |
| 587.84 | 618.38  | 24 | 20.8 | 25.8 | + | LNDLTSTLLGK      |       |
| 587.84 | 719.43  | 24 | 20.8 | 25.8 | + | LNDLTSTLLGK      |       |
| 587.84 | 947.54  | 24 | 20.8 | 25.8 | + | LNDLTSTLLGK      |       |
| 601.86 | 247.14  | 24 | 21.6 | 26.6 | + | VFLQLVEVQK       | MCM21 |
| 601.86 | 374.24  | 24 | 21.6 | 26.6 | + | VFLQLVEVQK       |       |
| 601.86 | 503.28  | 24 | 21.6 | 26.6 | + | VFLQLVEVQK       |       |
| 601.86 | 602.35  | 24 | 21.6 | 26.6 | + | VFLQLVEVQK       |       |
| 601.86 | 715.43  | 24 | 21.6 | 26.6 | + | VFLQLVEVQK       |       |
| 601.86 | 843.49  | 24 | 21.6 | 26.6 | + | VFLQLVEVQK       |       |
| 601.86 | 956.58  | 24 | 21.6 | 26.6 | + | VFLQLVEVQK       |       |
| 805.93 | 200.10  | 31 | 18.7 | 23.7 | + | AQADIPATPIPYEPK  |       |
| 805.93 | 633.32  | 31 | 18.7 | 23.7 | + | AQADIPATPIPYEPK  |       |
| 805.93 | 843.46  | 31 | 18.7 | 23.7 | + | AQADIPATPIPYEPK  |       |
| 805.93 | 1112.60 | 31 | 18.7 | 23.7 | + | AQADIPATPIPYEPK  |       |
| 805.93 | 1225.68 | 31 | 18.7 | 23.7 | + | AQADIPATPIPYEPK  |       |
| 871.44 | 217.08  | 33 | 22.8 | 27.8 | + | SELEDYIVLENVYR   |       |
| 871.44 | 330.17  | 33 | 22.8 | 27.8 | + | SELEDYIVLENVYR   |       |
| 871.44 | 551.29  | 33 | 22.8 | 27.8 | + | SELEDYIVLENVYR   |       |
| 871.44 | 680.34  | 33 | 22.8 | 27.8 | + | SELEDYIVLENVYR   |       |
| 871.44 | 793.42  | 33 | 22.8 | 27.8 | + | SELEDYIVLENVYR   |       |
| 871.44 | 892.49  | 33 | 22.8 | 27.8 | + | SELEDYIVLENVYR   |       |
| 871.44 | 1005.57 | 33 | 22.8 | 27.8 | + | SELEDYIVLENVYR   |       |
| 871.44 | 1168.64 | 33 | 22.8 | 27.8 | + | SELEDYIVLENVYR   |       |
| 871.44 | 1283.66 | 33 | 22.8 | 27.8 | + | SELEDYIVLENVYR   |       |

|        |         |    |      |      |   |                     |              |
|--------|---------|----|------|------|---|---------------------|--------------|
| 871.44 | 1412.71 | 33 | 22.8 | 27.8 | + | SELEDYIVLENVYR      |              |
| 635.30 | 277.15  | 25 | 17.7 | 22.7 | + | LYFEPETQDK          | <i>MCM19</i> |
| 635.30 | 390.20  | 25 | 17.7 | 22.7 | + | LYFEPETQDK          |              |
| 635.30 | 424.22  | 25 | 17.7 | 22.7 | + | LYFEPETQDK          |              |
| 635.30 | 491.25  | 25 | 17.7 | 22.7 | + | LYFEPETQDK          |              |
| 635.30 | 553.27  | 25 | 17.7 | 22.7 | + | LYFEPETQDK          |              |
| 635.30 | 717.34  | 25 | 17.7 | 22.7 | + | LYFEPETQDK          |              |
| 635.30 | 846.38  | 25 | 17.7 | 22.7 | + | LYFEPETQDK          |              |
| 635.30 | 993.45  | 25 | 17.7 | 22.7 | + | LYFEPETQDK          |              |
| 727.85 | 229.12  | 28 | 18.4 | 23.4 | + | LDISNLDEGTYSK       |              |
| 727.85 | 397.21  | 28 | 18.4 | 23.4 | + | LDISNLDEGTYSK       |              |
| 727.85 | 498.26  | 28 | 18.4 | 23.4 | + | LDISNLDEGTYSK       |              |
| 727.85 | 555.28  | 28 | 18.4 | 23.4 | + | LDISNLDEGTYSK       |              |
| 727.85 | 684.32  | 28 | 18.4 | 23.4 | + | LDISNLDEGTYSK       |              |
| 727.85 | 799.35  | 28 | 18.4 | 23.4 | + | LDISNLDEGTYSK       |              |
| 727.85 | 912.43  | 28 | 18.4 | 23.4 | + | LDISNLDEGTYSK       |              |
| 727.85 | 1026.47 | 28 | 18.4 | 23.4 | + | LDISNLDEGTYSK       |              |
| 727.85 | 1058.50 | 28 | 18.4 | 23.4 | + | LDISNLDEGTYSK       |              |
| 727.85 | 1113.51 | 28 | 18.4 | 23.4 | + | LDISNLDEGTYSK       |              |
| 727.85 | 1226.59 | 28 | 18.4 | 23.4 | + | LDISNLDEGTYSK       |              |
| 741.37 | 244.09  | 29 | 21.6 | 26.6 | + | ENIEQITWFSSK        |              |
| 741.37 | 321.18  | 29 | 21.6 | 26.6 | + | ENIEQITWFSSK        |              |
| 741.37 | 468.25  | 29 | 21.6 | 26.6 | + | ENIEQITWFSSK        |              |
| 741.37 | 654.32  | 29 | 21.6 | 26.6 | + | ENIEQITWFSSK        |              |
| 741.37 | 868.46  | 29 | 21.6 | 26.6 | + | ENIEQITWFSSK        |              |
| 741.37 | 996.51  | 29 | 21.6 | 26.6 | + | ENIEQITWFSSK        |              |
| 741.37 | 1125.56 | 29 | 21.6 | 26.6 | + | ENIEQITWFSSK        |              |
| 741.37 | 1161.56 | 29 | 21.6 | 26.6 | + | ENIEQITWFSSK        |              |
| 621.35 | 416.26  | 24 | 18.6 | 23.6 | + | DAPGSATLILQR        | <i>CTF3</i>  |
| 621.35 | 528.31  | 24 | 18.6 | 23.6 | + | DAPGSATLILQR        |              |
| 621.35 | 529.35  | 24 | 18.6 | 23.6 | + | DAPGSATLILQR        |              |
| 621.35 | 642.43  | 24 | 18.6 | 23.6 | + | DAPGSATLILQR        |              |
| 621.35 | 743.48  | 24 | 18.6 | 23.6 | + | DAPGSATLILQR        |              |
| 621.35 | 814.51  | 24 | 18.6 | 23.6 | + | DAPGSATLILQR        |              |
| 621.35 | 901.55  | 24 | 18.6 | 23.6 | + | DAPGSATLILQR        |              |
| 621.35 | 958.57  | 24 | 18.6 | 23.6 | + | DAPGSATLILQR        |              |
| 622.32 | 201.12  | 24 | 24.1 | 29.1 | + | SLFGVSPDFFK         |              |
| 622.32 | 294.18  | 24 | 24.1 | 29.1 | + | SLFGVSPDFFK         |              |
| 622.32 | 504.28  | 24 | 24.1 | 29.1 | + | SLFGVSPDFFK         |              |
| 622.32 | 591.31  | 24 | 24.1 | 29.1 | + | SLFGVSPDFFK         |              |
| 622.32 | 740.36  | 24 | 24.1 | 29.1 | + | SLFGVSPDFFK         |              |
| 622.32 | 839.43  | 24 | 24.1 | 29.1 | + | SLFGVSPDFFK         |              |
| 622.32 | 896.45  | 24 | 24.1 | 29.1 | + | SLFGVSPDFFK         |              |
| 622.32 | 1043.52 | 24 | 24.1 | 29.1 | + | SLFGVSPDFFK         |              |
| 825.91 | 247.14  | 31 | 21.4 | 26.4 | + | VFSSDDPLLSAAC[160]R |              |
| 825.91 | 406.19  | 31 | 21.4 | 26.4 | + | VFSSDDPLLSAAC[160]R |              |
| 825.91 | 564.26  | 31 | 21.4 | 26.4 | + | VFSSDDPLLSAAC[160]R |              |
| 825.91 | 651.26  | 31 | 21.4 | 26.4 | + | VFSSDDPLLSAAC[160]R |              |
| 825.91 | 677.34  | 31 | 21.4 | 26.4 | + | VFSSDDPLLSAAC[160]R |              |
| 825.91 | 790.42  | 31 | 21.4 | 26.4 | + | VFSSDDPLLSAAC[160]R |              |
| 825.91 | 1000.56 | 31 | 21.4 | 26.4 | + | VFSSDDPLLSAAC[160]R |              |
| 457.78 | 227.18  | 19 | 19.2 | 24.2 | + | LLLEEAVK            | <i>NKP1</i>  |
| 457.78 | 317.22  | 19 | 19.2 | 24.2 | + | LLLEEAVK            |              |
| 457.78 | 446.26  | 19 | 19.2 | 24.2 | + | LLLEEAVK            |              |
| 457.78 | 575.30  | 19 | 19.2 | 24.2 | + | LLLEEAVK            |              |
| 457.78 | 688.39  | 19 | 19.2 | 24.2 | + | LLLEEAVK            |              |
| 457.78 | 801.47  | 19 | 19.2 | 24.2 | + | LLLEEAVK            |              |
| 540.79 | 213.16  | 22 | 16.5 | 21.5 | + | VLSEYSNLR           |              |



|        |         |    |      |      |   |              |             |
|--------|---------|----|------|------|---|--------------|-------------|
| 540.79 | 489.28  | 22 | 16.5 | 21.5 | + | VLSEYSNLR    |             |
| 540.79 | 652.34  | 22 | 16.5 | 21.5 | + | VLSEYSNLR    |             |
| 540.79 | 781.38  | 22 | 16.5 | 21.5 | + | VLSEYSNLR    |             |
| 540.79 | 868.42  | 22 | 16.5 | 21.5 | + | VLSEYSNLR    |             |
| 540.79 | 981.50  | 22 | 16.5 | 21.5 | + | VLSEYSNLR    |             |
| 666.33 | 229.12  | 26 | 13.9 | 18.9 | + | VEGEPQSTSIER |             |
| 666.33 | 286.14  | 26 | 13.9 | 18.9 | + | VEGEPQSTSIER |             |
| 666.33 | 692.36  | 26 | 13.9 | 18.9 | + | VEGEPQSTSIER |             |
| 666.33 | 820.42  | 26 | 13.9 | 18.9 | + | VEGEPQSTSIER |             |
| 666.33 | 917.47  | 26 | 13.9 | 18.9 | + | VEGEPQSTSIER |             |
| 666.33 | 1046.51 | 26 | 13.9 | 18.9 | + | VEGEPQSTSIER |             |
| 666.33 | 1103.53 | 26 | 13.9 | 18.9 | + | VEGEPQSTSIER |             |
| 452.74 | 201.12  | 19 | 13.7 | 18.7 | + | VTSELEAR     | <i>NKP2</i> |
| 452.74 | 246.16  | 19 | 13.7 | 18.7 | + | VTSELEAR     |             |
| 452.74 | 375.20  | 19 | 13.7 | 18.7 | + | VTSELEAR     |             |
| 452.74 | 417.20  | 19 | 13.7 | 18.7 | + | VTSELEAR     |             |
| 452.74 | 617.33  | 19 | 13.7 | 18.7 | + | VTSELEAR     |             |
| 452.74 | 704.36  | 19 | 13.7 | 18.7 | + | VTSELEAR     |             |
| 500.28 | 228.13  | 20 | 17.0 | 22.0 | + | INDLLQQR     |             |
| 500.28 | 303.18  | 20 | 17.0 | 22.0 | + | INDLLQQR     |             |
| 500.28 | 343.16  | 20 | 17.0 | 22.0 | + | INDLLQQR     |             |
| 500.28 | 431.24  | 20 | 17.0 | 22.0 | + | INDLLQQR     |             |
| 500.28 | 456.25  | 20 | 17.0 | 22.0 | + | INDLLQQR     |             |
| 500.28 | 544.32  | 20 | 17.0 | 22.0 | + | INDLLQQR     |             |
| 500.28 | 657.40  | 20 | 17.0 | 22.0 | + | INDLLQQR     |             |
| 500.28 | 772.43  | 20 | 17.0 | 22.0 | + | INDLLQQR     |             |
| 500.28 | 886.47  | 20 | 17.0 | 22.0 | + | INDLLQQR     |             |
| 643.35 | 242.15  | 25 | 19.9 | 24.9 | + | LQILDDAIQEK  |             |
| 643.35 | 276.16  | 25 | 19.9 | 24.9 | + | LQILDDAIQEK  |             |
| 643.35 | 355.23  | 25 | 19.9 | 24.9 | + | LQILDDAIQEK  |             |
| 643.35 | 517.30  | 25 | 19.9 | 24.9 | + | LQILDDAIQEK  |             |
| 643.35 | 588.34  | 25 | 19.9 | 24.9 | + | LQILDDAIQEK  |             |
| 643.35 | 703.36  | 25 | 19.9 | 24.9 | + | LQILDDAIQEK  |             |
| 643.35 | 818.39  | 25 | 19.9 | 24.9 | + | LQILDDAIQEK  |             |
| 643.35 | 931.47  | 25 | 19.9 | 24.9 | + | LQILDDAIQEK  |             |
| 643.35 | 1044.56 | 25 | 19.9 | 24.9 | + | LQILDDAIQEK  |             |
| 458.29 | 213.16  | 19 | 17.7 | 22.7 | + | LVLQSISR     | <i>CHL4</i> |
| 458.29 | 352.21  | 19 | 17.7 | 22.7 | + | LVLQSISR     |             |
| 458.29 | 462.27  | 19 | 17.7 | 22.7 | + | LVLQSISR     |             |
| 458.29 | 590.33  | 19 | 17.7 | 22.7 | + | LVLQSISR     |             |
| 458.29 | 703.41  | 19 | 17.7 | 22.7 | + | LVLQSISR     |             |
| 566.85 | 235.12  | 23 | 19.3 | 24.3 | + | HPSLPVLITR   |             |
| 566.85 | 276.17  | 23 | 19.3 | 24.3 | + | HPSLPVLITR   |             |
| 566.85 | 435.24  | 23 | 19.3 | 24.3 | + | HPSLPVLITR   |             |
| 566.85 | 502.33  | 23 | 19.3 | 24.3 | + | HPSLPVLITR   |             |
| 566.85 | 601.40  | 23 | 19.3 | 24.3 | + | HPSLPVLITR   |             |
| 566.85 | 698.46  | 23 | 19.3 | 24.3 | + | HPSLPVLITR   |             |
| 566.85 | 898.57  | 23 | 19.3 | 24.3 | + | HPSLPVLITR   |             |
| 566.85 | 995.62  | 23 | 19.3 | 24.3 | + | HPSLPVLITR   |             |
| 646.35 | 261.16  | 25 | 19.2 | 24.2 | + | FIENLQTDLAK  |             |
| 646.35 | 331.23  | 25 | 19.2 | 24.2 | + | FIENLQTDLAK  |             |
| 646.35 | 390.20  | 25 | 19.2 | 24.2 | + | FIENLQTDLAK  |             |
| 646.35 | 446.26  | 25 | 19.2 | 24.2 | + | FIENLQTDLAK  |             |
| 646.35 | 504.25  | 25 | 19.2 | 24.2 | + | FIENLQTDLAK  |             |
| 646.35 | 547.31  | 25 | 19.2 | 24.2 | + | FIENLQTDLAK  |             |
| 646.35 | 675.37  | 25 | 19.2 | 24.2 | + | FIENLQTDLAK  |             |
| 646.35 | 902.49  | 25 | 19.2 | 24.2 | + | FIENLQTDLAK  |             |
| 646.35 | 1031.54 | 25 | 19.2 | 24.2 | + | FIENLQTDLAK  |             |

|        |        |    |      |      |   |            |                      |
|--------|--------|----|------|------|---|------------|----------------------|
| 421.76 | 472.29 | 17 | 5    | 35   | + | VATVSLPR   | porcine trypsin      |
| 421.76 | 571.36 | 15 | 5    | 35   | + | VATVSLPR   |                      |
| 421.76 | 672.40 | 15 | 5    | 35   | + | VATVSLPR   |                      |
| 421.76 | 743.44 | 17 | 5    | 35   | + | VATVSLPR   |                      |
| 523.29 | 661.36 | 25 | 5    | 35   | + | LSSPATLNSR |                      |
| 523.29 | 758.42 | 19 | 5    | 35   | + | LSSPATLNSR |                      |
| 523.29 | 845.45 | 17 | 5    | 35   | + | LSSPATLNSR |                      |
| 523.29 | 932.48 | 21 | 5    | 35   | + | LSSPATLNSR |                      |
| 395.24 | 361.24 | 18 | 15.4 | 20.4 | + | LVTDLTK    | bovine serum albumin |
| 395.24 | 476.27 | 16 | 15.4 | 20.4 | + | LVTDLTK    |                      |
| 395.24 | 577.32 | 12 | 15.4 | 20.4 | + | LVTDLTK    |                      |
| 395.24 | 676.39 | 14 | 15.4 | 20.4 | + | LVTDLTK    |                      |
| 464.25 | 359.24 | 19 | 17.7 | 22.7 | + | YLYEIAR    |                      |
| 464.25 | 488.28 | 15 | 17.7 | 22.7 | + | YLYEIAR    |                      |
| 464.25 | 651.35 | 15 | 17.7 | 22.7 | + | YLYEIAR    |                      |
| 464.25 | 764.43 | 17 | 17.7 | 22.7 | + | YLYEIAR    |                      |
| 582.32 | 595.31 | 19 | 19.9 | 24.9 | + | LVNELTEFAK |                      |
| 582.32 | 708.39 | 19 | 19.9 | 24.9 | + | LVNELTEFAK |                      |
| 582.32 | 837.44 | 19 | 19.9 | 24.9 | + | LVNELTEFAK |                      |
| 582.32 | 951.48 | 19 | 19.9 | 24.9 | + | LVNELTEFAK |                      |
